# Supplementary material for: MicroRNA-mediated repression of nonsense mRNAs
Source: eLife journal article supplement (doi:10.7554/elife.03032), 2014-08-08
Supplement: supp [file elife-03032-supp-v1.zip]

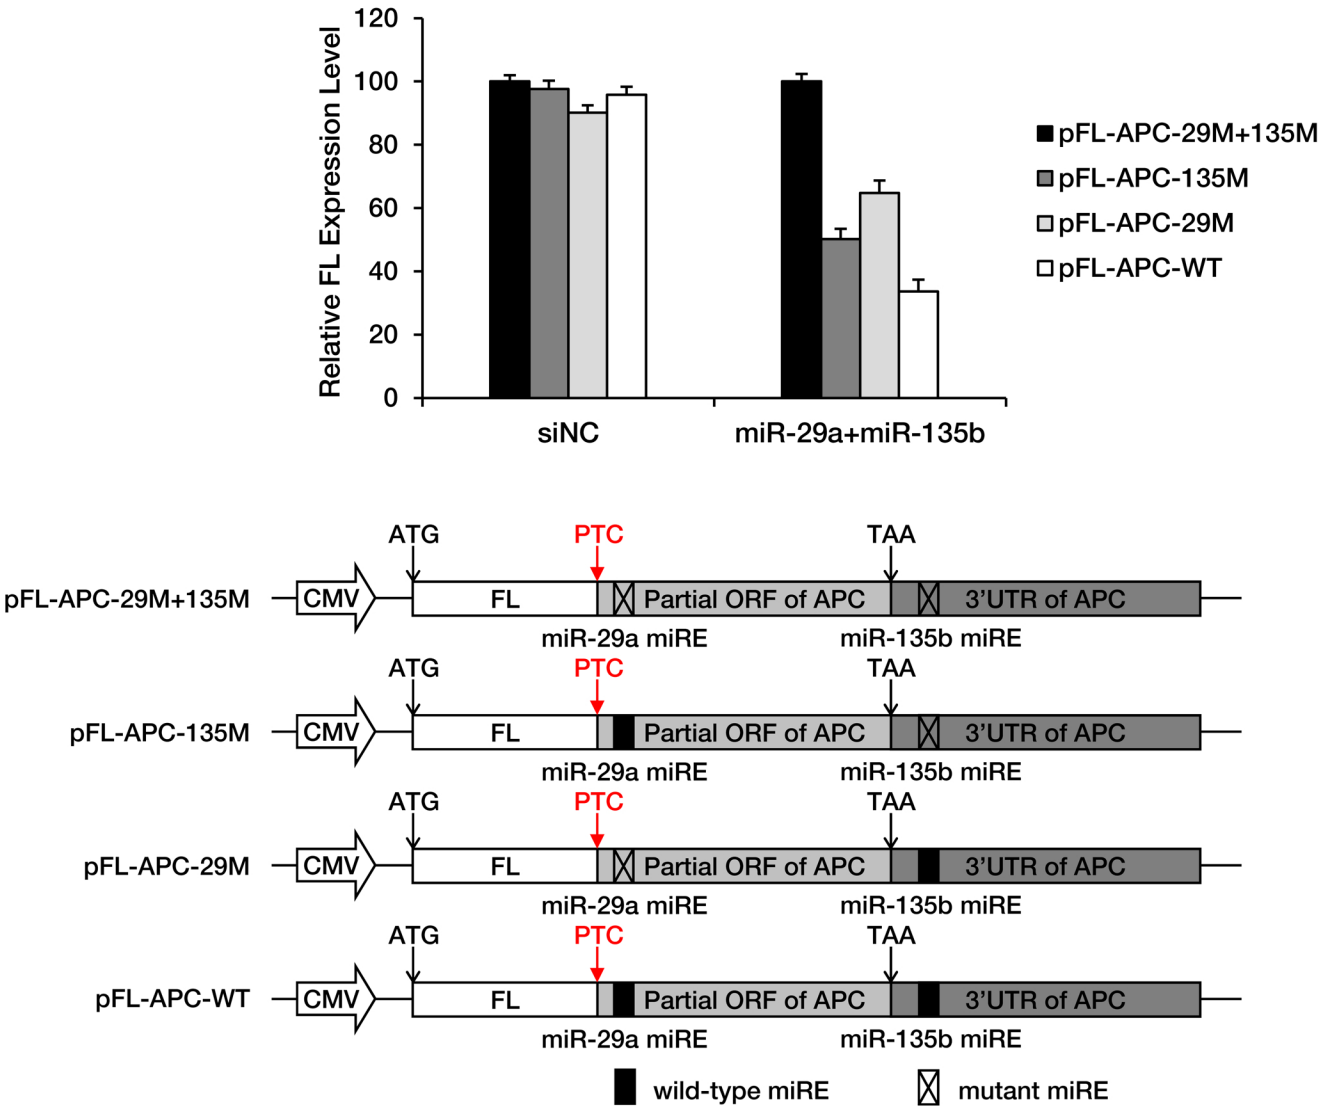

Figure 3-figure supplement 3. Full functionality of miREs in the PTC-STOP region in the presence of 3' UTR-dependent repression by miRNAs
