# Supplementary material for: MicroRNA-mediated repression of nonsense mRNAs
Source: eLife journal article supplement (doi:10.7554/elife.03032), 2014-08-08
Supplement: supp [file elife-03032-supp-v1.zip]

Figure 1-figure supplement 2

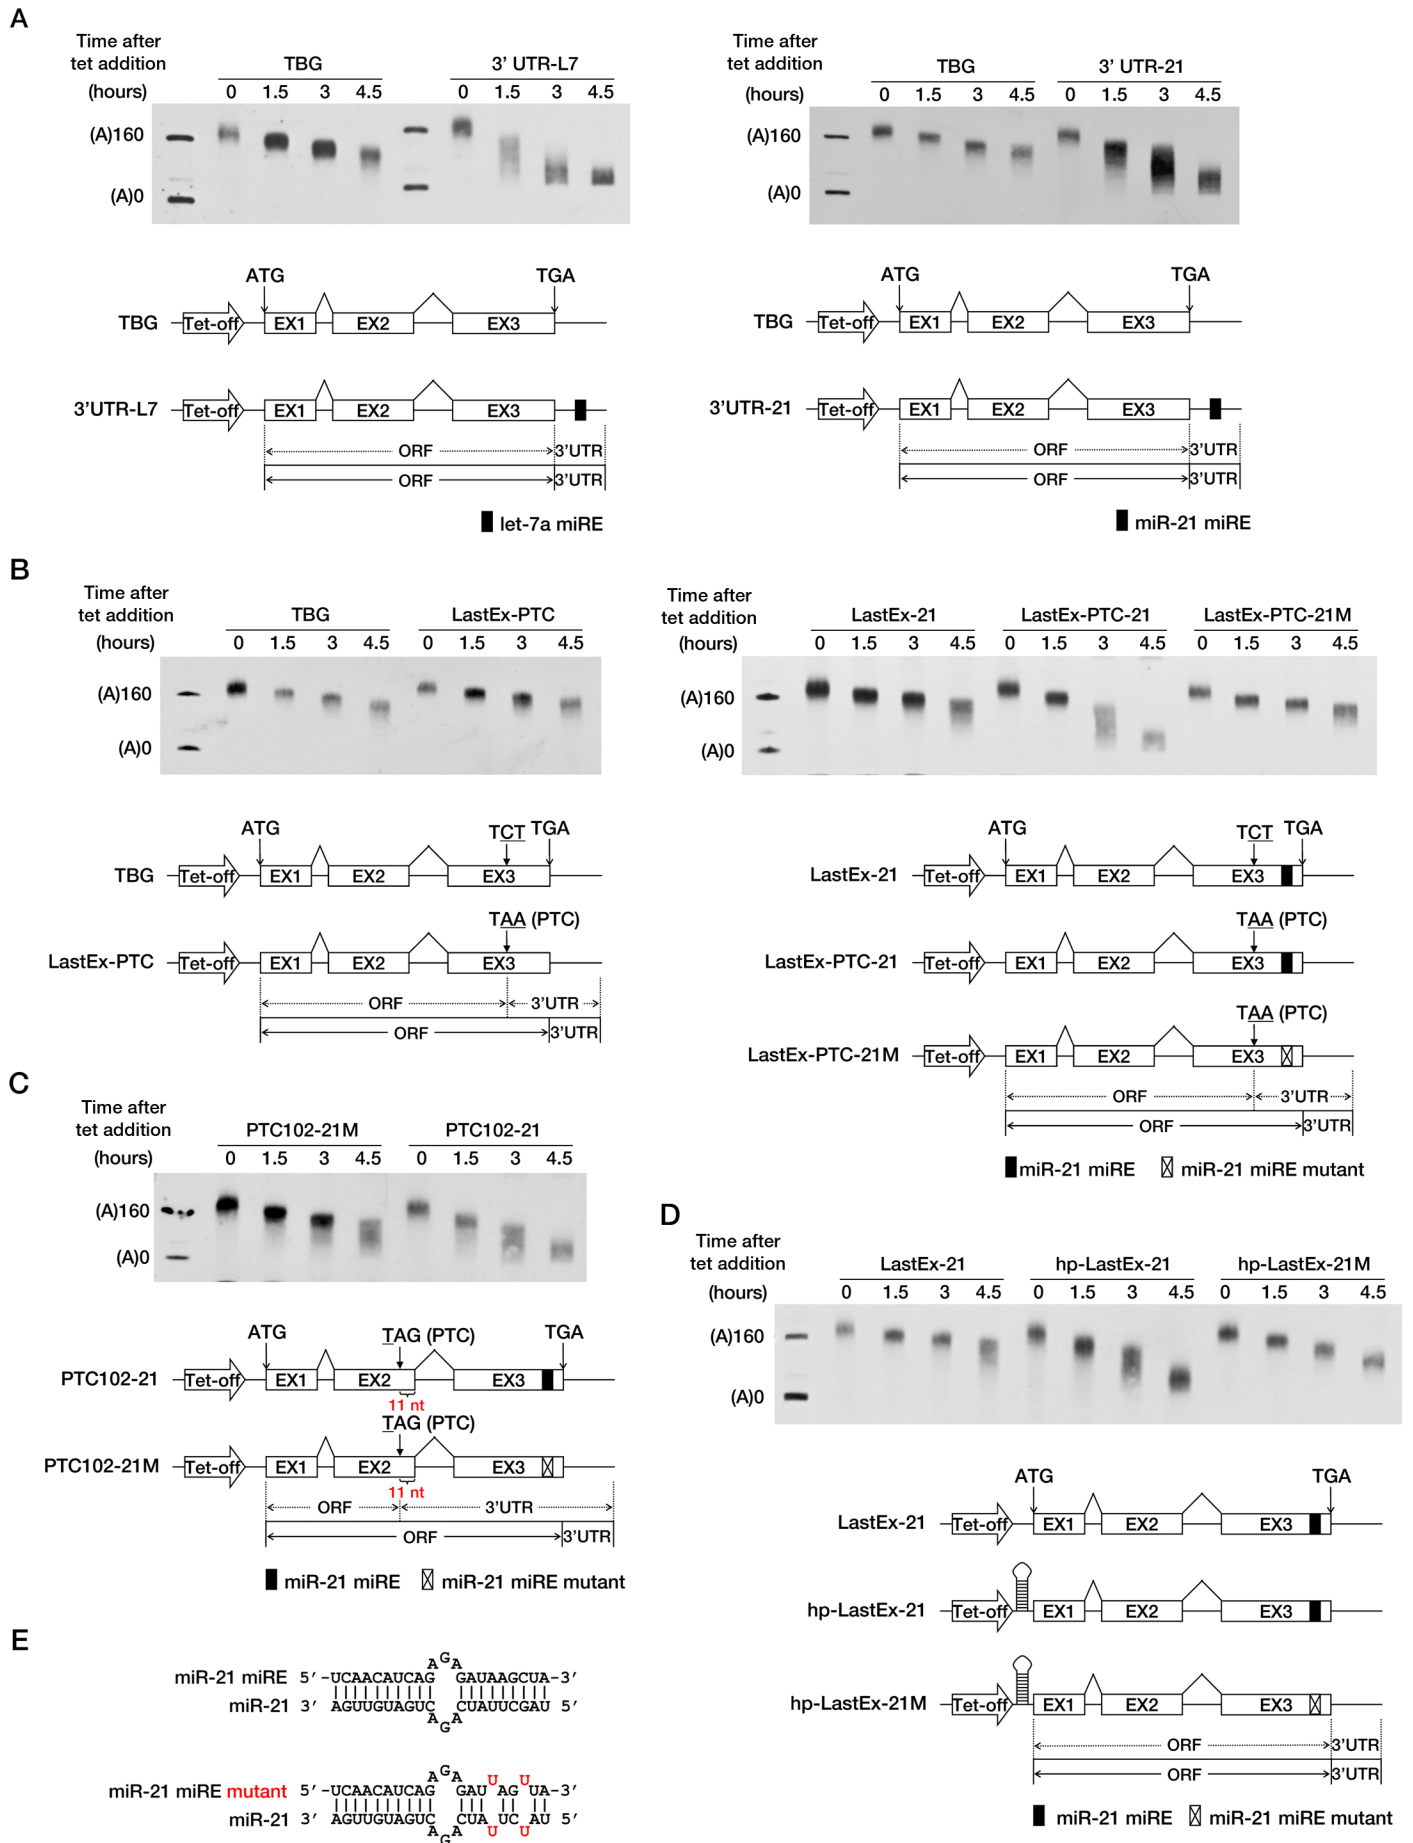

Figure 1-figure supplement 2. A PTC potentiates rapid miR-21-mediated deadenylation of nonsense mRNAs
