# Supplementary material for: MicroRNA-mediated repression of nonsense mRNAs
Source: eLife journal article supplement (doi:10.7554/elife.03032), 2014-08-08
Supplement: supp [file elife-03032-supp-v1.zip]

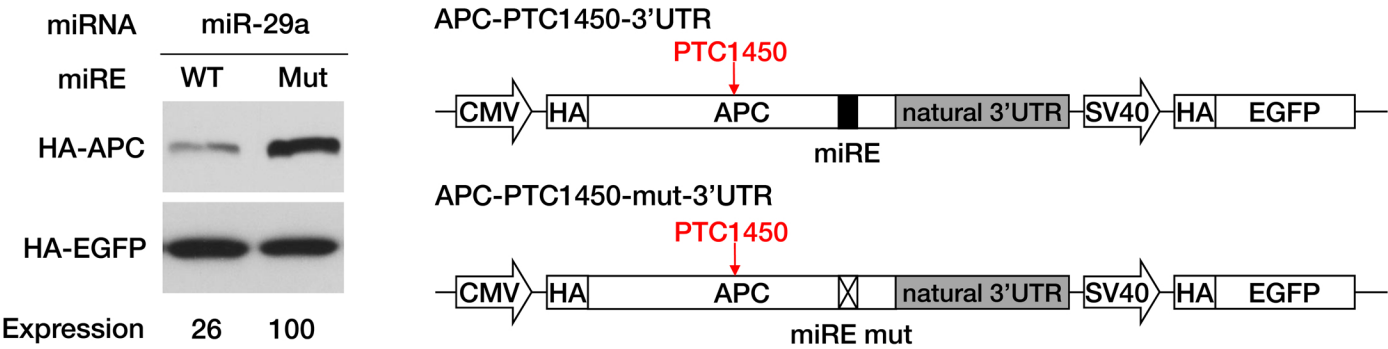

Figure 3-figure supplement 2. Repressive activity of miR-29a miREs within the PTC-STOP region of APC minigenes bearing the natural APC 3' UTR
