# Supplementary material for: MicroRNA-mediated repression of nonsense mRNAs
Source: eLife. 2014 Aug 8;3:e03032. doi: 10.7554/eLife.03032 (PMC4359369; doi:10.7554/eLife.03032)
Supplement: Supplementary file 1. — Screening results of functional miREs in the PTC-STOP region of APC mRNA. Reporter constructs and the strategy for miRE screening were described in Figure 3—figure supplement 1A. In total, 45 miRNAs based on their general abundance in human tissues and the predicted thermal stability of the duplex they may form with an APC miRE were chosen for the screening. The repression ratio for each miRNA was calculated from normalized levels of firefly luciferase activity in the presence of a control small RNA (siEGFP) versus a miRNA mimic. DOI: http://dx.doi.org/10.7554/eLife.03032.017 [file elife03032s001.xlsx]

## Sheet: Sheet1
miRNA mimic	Repression Ratio
hsa-let-7g-5p	1.31
hsa-miR-100-5p	0.93
hsa-miR-103a-3p	1.05
hsa-miR-125a-3p	0.95
hsa-miR-127-5p	1.64
hsa-miR-133b	0.9
hsa-miR-135b-5p	1.18
hsa-miR-138-5p	1.8
hsa-miR-141-3p	1.05
hsa-miR-143-3p	0.9
hsa-miR-145-5p	1.38
hsa-miR-146b-5p	1.53
hsa-miR-16-5p	1.04
hsa-miR-182-5p	0.98324
hsa-miR-187-3p	1.13
hsa-miR-192-5p	1.26
hsa-miR-195-5p	1.05
hsa-miR-199a-3p	1.28
hsa-miR-19a-3p	1.2
hsa-miR-200c-3p	0.98
hsa-miR-203a	1.25
hsa-miR-204-5p	0.9
hsa-miR-21-5p	1.08
hsa-miR-214-3p	0.96
hsa-miR-22-3p	1.07
hsa-miR-23a-3p	0.96
hsa-miR-24-3p	1.41
hsa-miR-27b-3p	1.38
hsa-miR-28-5p	1.3
hsa-miR-29a-3p	1.85
hsa-miR-302a-3p	1.16
hsa-miR-320a	1.2
hsa-miR-324-3p	1.2
hsa-miR-324-5p	0.95
hsa-miR-339-5p	1.18
hsa-miR-345-5p	1.25
hsa-miR-361-5p	1.27
hsa-miR-378a-5p	1.62
hsa-miR-382-5p	1.34
hsa-miR-424-5p	1.14
hsa-miR-431-5p	1
hsa-miR-432-5p	1.48
hsa-miR-7-5p	1.02
hsa-miR-9-5p	1.38
hsa-miR-99b-5p	0.93
Repression ratio for each miRNA mimic was calculated from normalized levels of firefly luciferase activity in the presence of a control small RNA (siEGFP) versus a miRNA mimic.
