# Supplementary material for: MicroRNA-mediated repression of nonsense mRNAs
Source: eLife. 2014 Aug 8;3:e03032. doi: 10.7554/eLife.03032 (PMC4359369; doi:10.7554/eLife.03032)
Supplement: Supplementary file 2. — Transcriptome-wide identification of nonsense mRNAs caused by point mutation in HCT-116 cells. Exome sequencing was performed to identify all PTC-containing mutants in the genome of HCT-116 cells. Genes with the PTC/WT allele reads ratio between 0.7 and 1.3 were considered to be heterozygous. Transcriptome sequencing data were then analyzed to evaluate the effect of these heterozygous PTCs on mRNA stability. Sequencing reads that specifically mapped to the PTC and wild-type allele were counted and used to calculate the relative concentration of the respective transcripts. In total, 47 heterozygous PTC-containing mRNAs predicted from the genomic sequence were actively expressed in HCT-116 cells, as shown in the list. Candidates were subdivided into EJC-NMD-sensitive and/or miRNA-mediated surveillance-sensitive groups according to the position of the PTC. miREs in the PTC-STOP region of each candidate were predicted based on the 2–7 seed match rule and the top 150 expressed miRNAs in HCT-116 cells. Candidates highlighted in yellow were selected for experimental validation. Candidates that contain at least one experimentally verified miRE are shown in red font. DOI: http://dx.doi.org/10.7554/eLife.03032.018 [file elife03032s002.xlsx]

## Sheet: Sheet1
Chrom.	Loc.	Ref	Alt	WT/PTC in Exome-seq	Length of PTC-STOP region	Transcript Name	Transcript ID	NMD Type	Reads of WT	Reads of PTC	% PTC reads	% WT reads	WT/PTC in RNA-seq	Individual WT:PTC in six RNA-seq runs	Total Predicted miREs	miRE:seed start
chr2	85628801	G	A	1.0137	845	CAPG	ENST00000263867	EJC+miRNA	4469	184	0.0395444	0.960456	24.288	845:22_851:17_844:34_655:39_637:42_637:30	27	hsa-let-7a-3p:550_hsa-miR-16-5p:56_hsa-miR-22-3p:543_hsa-miR-148a-3p:258_hsa-miR-183-5p:200_hsa-miR-203a:170_hsa-miR-15b-5p:56_hsa-miR-125b-5p:794_hsa-miR-140-3p:330_hsa-miR-145-5p:835_hsa-miR-145-5p:570_hsa-miR-125a-5p:794_hsa-miR-361-5p:627_hsa-miR-330-3p:643_hsa-miR-148b-3p:258_hsa-miR-331-3p:18_hsa-miR-339-5p:404_hsa-miR-345-5p:163_hsa-miR-423-3p:250_hsa-miR-484:478_hsa-miR-484:445_hsa-miR-50…
chr2	173333907	C	T	1	2951	ITGA6	ENST00000264106	EJC+miRNA	1352	81	0.0565248	0.943475	16.6914	252:21_238:18_216:16_204:10_233:8_209:8	141	hsa-miR-16-5p:2622_hsa-miR-17-5p:497_hsa-miR-17-5p:1922_hsa-miR-17-5p:230_hsa-miR-17-5p:1793_hsa-miR-18a-5p:1955_hsa-miR-18a-5p:961_hsa-miR-19a-3p:1601_hsa-miR-19b-3p:1601_hsa-miR-20a-5p:497_hsa-miR-20a-5p:1922_hsa-miR-20a-5p:230_hsa-miR-20a-5p:1793_hsa-miR-21-3p:16_hsa-miR-22-3p:135_hsa-miR-23a-3p:427_hsa-miR-23a-3p:763_hsa-miR-23a-3p:2614_hsa-miR-24-3p:2318_hsa-miR-24-3p:1307_hsa-miR-25-5p:1123…
chr8	21851874	C	T	1.18	1115	XPO7	ENST00000434536	EJC+miRNA	737	55	0.0694444	0.930556	13.4	102:5_137:2_116:3_124:20_114:14_144:11	55	hsa-let-7a-5p:684_hsa-let-7a-3p:592_hsa-let-7b-5p:684_hsa-let-7d-5p:684_hsa-let-7e-5p:684_hsa-let-7f-5p:684_hsa-miR-16-5p:461_hsa-miR-16-5p:655_hsa-miR-16-5p:372_hsa-miR-16-5p:652_hsa-miR-22-3p:695_hsa-miR-26a-5p:629_hsa-miR-26b-5p:629_hsa-miR-28-5p:658_hsa-miR-28-5p:464_hsa-miR-28-3p:5_hsa-miR-29a-3p:806_hsa-miR-96-5p:103_hsa-miR-96-5p:53_hsa-miR-98-5p:684_hsa-miR-103a-2-5p:940_hsa-miR-103a-3p:6…
chr2	216213894	G	A	1.15789	198	ATIC	ENST00000236959	EJC+miRNA	1255	103	0.0758468	0.924153	12.1845	169:18_190:9_176:18_222:16_273:23_225:19	9	hsa-miR-16-5p:115_hsa-miR-103a-3p:114_hsa-miR-107:114_hsa-miR-7-5p:41_hsa-miR-7-5p:185_hsa-miR-15b-5p:115_hsa-miR-145-3p:154_hsa-miR-151a-5p:161_hsa-miR-151b:161
chr14	56139659	C	T	1.10811	458	KTN1	ENST00000395309	EJC+miRNA	675	56	0.0766074	0.923393	12.0536	92:5_106:6_79:3_113:13_149:12_136:17	18	hsa-miR-16-5p:282_hsa-miR-21-3p:446_hsa-miR-26a-5p:104_hsa-miR-26b-5p:104_hsa-miR-101-3p:296_hsa-miR-196a-5p:46_hsa-miR-197-3p:224_hsa-miR-7-1-3p:152_hsa-miR-15b-5p:282_hsa-miR-145-5p:251_hsa-miR-194-5p:53_hsa-miR-130b-5p:432_hsa-miR-30e-3p:72_hsa-miR-151a-3p:363_hsa-miR-335-3p:305_hsa-miR-345-5p:62_hsa-miR-196b-5p:46_hsa-miR-3065-5p:153
chr4	79254566	G	T	1.11905	9761	FRAS1	ENST00000264895	EJC+miRNA	334	29	0.0798898	0.92011	11.5172	67:2_60:2_60:1_44:10_58:4_45:10	434	hsa-let-7a-5p:488_hsa-let-7a-5p:6747_hsa-let-7a-5p:2242_hsa-let-7b-5p:488_hsa-let-7b-5p:6747_hsa-let-7b-5p:2242_hsa-let-7d-5p:488_hsa-let-7d-5p:6747_hsa-let-7d-5p:2242_hsa-let-7e-5p:488_hsa-let-7e-5p:6747_hsa-let-7e-5p:2242_hsa-let-7f-5p:2242_hsa-let-7f-5p:488_hsa-let-7f-5p:6747_hsa-miR-16-5p:2862_hsa-miR-16-5p:230_hsa-miR-16-5p:5223_hsa-miR-17-5p:5231_hsa-miR-17-5p:2696_hsa-miR-17-5p:9078_hsa-mi…
chr15	41769456	C	T	0.873418	479	RTF1	ENST00000389629	EJC+miRNA	455	66	0.126679	0.873321	6.89394	70:12_91:15_83:9_68:7_85:14_58:9	17	hsa-miR-23a-3p:340_hsa-miR-25-5p:404_hsa-miR-183-5p:188_hsa-miR-224-5p:350_hsa-miR-23b-3p:340_hsa-miR-141-3p:227_hsa-miR-9-5p:243_hsa-miR-9-3p:381_hsa-miR-149-5p:296_hsa-miR-194-5p:229_hsa-miR-200a-3p:227_hsa-miR-30e-3p:88_hsa-miR-362-5p:414_hsa-miR-135b-5p:386_hsa-miR-335-3p:103_hsa-miR-345-5p:292_hsa-miR-1285-3p:198
chr12	56481853	C	T	1	3248	ERBB3	ENST00000267101	EJC+miRNA	365	54	0.128878	0.871122	6.75926	62:10_67:10_55:14_69:8_52:6_60:6	145	hsa-miR-16-5p:1538_hsa-miR-16-5p:1814_hsa-miR-16-5p:1649_hsa-miR-16-5p:1646_hsa-miR-17-5p:1202_hsa-miR-17-5p:1869_hsa-miR-20a-5p:1869_hsa-miR-20a-5p:1202_hsa-miR-22-3p:1568_hsa-miR-22-3p:599_hsa-miR-22-3p:979_hsa-miR-22-3p:1811_hsa-miR-23a-3p:1612_hsa-miR-24-3p:179_hsa-miR-25-5p:2304_hsa-miR-25-3p:912_hsa-miR-26a-5p:523_hsa-miR-26b-5p:523_hsa-miR-27a-3p:1483_hsa-miR-27a-3p:209_hsa-miR-28-5p:730_h…
chr12	125621369	C	T	0.75	179	AACS	ENST00000316519	miRNA	293	46	0.135693	0.864307	6.36957	43:11_51:4_49:10_58:7_45:8_47:6	4	hsa-let-7d-3p:40_hsa-miR-29a-3p:114_hsa-miR-1301-3p:164_hsa-miR-1285-3p:8
chr17	26965043	G	A	0.745763	5126	KIAA0100	ENST00000528896	EJC+miRNA	619	102	0.14147	0.85853	6.06863	93:14_127:24_86:19_94:11_108:18_111:16	223	hsa-let-7a-5p:2506_hsa-let-7b-5p:2506_hsa-let-7d-5p:2506_hsa-let-7e-5p:2506_hsa-let-7f-5p:2506_hsa-miR-16-5p:738_hsa-miR-16-5p:2014_hsa-miR-16-5p:599_hsa-miR-16-5p:791_hsa-miR-16-5p:3755_hsa-miR-18a-5p:1789_hsa-miR-19a-3p:529_hsa-miR-19a-3p:1602_hsa-miR-19b-3p:529_hsa-miR-19b-3p:1602_hsa-miR-21-3p:4060_hsa-miR-22-3p:3998_hsa-miR-22-3p:4598_hsa-miR-22-3p:788_hsa-miR-22-3p:4025_hsa-miR-22-3p:2844_h…
chr13	103288670	C	T	1.28571	2183	TPP2	ENST00000376052	EJC+miRNA	183	36	0.164384	0.835616	5.08333	20:4_36:7_23:4_26:6_29:8_49:7	101	hsa-let-7a-5p:1414_hsa-let-7b-5p:1414_hsa-let-7d-5p:1414_hsa-let-7e-5p:1414_hsa-let-7f-5p:1414_hsa-miR-17-5p:351_hsa-miR-18a-5p:22_hsa-miR-19a-3p:1603_hsa-miR-19a-3p:1177_hsa-miR-19b-3p:1603_hsa-miR-19b-3p:1177_hsa-miR-20a-5p:351_hsa-miR-22-3p:1749_hsa-miR-25-3p:1721_hsa-miR-28-5p:669_hsa-miR-28-3p:1545_hsa-miR-30a-5p:1493_hsa-miR-92a-3p:1721_hsa-miR-93-5p:351_hsa-miR-96-5p:832_hsa-miR-98-5p:1414…
chr1	19420582	G	A	1.26471	1817	UBR4	ENST00000375267	EJC+miRNA	2078	440	0.174742	0.825258	4.72273	424:74_417:106_394:87_269:51_298:65_276:57	70	hsa-let-7a-5p:1026_hsa-let-7b-5p:1026_hsa-let-7d-5p:1026_hsa-let-7e-5p:1026_hsa-let-7f-5p:1026_hsa-miR-16-5p:374_hsa-miR-16-5p:198_hsa-miR-18a-5p:11_hsa-miR-21-5p:449_hsa-miR-25-5p:1645_hsa-miR-26a-5p:275_hsa-miR-26b-5p:275_hsa-miR-27a-3p:1583_hsa-miR-28-5p:956_hsa-miR-31-5p:356_hsa-miR-96-5p:935_hsa-miR-98-5p:1026_hsa-miR-103a-2-5p:577_hsa-miR-103a-3p:714_hsa-miR-107:714_hsa-miR-197-3p:1390_hsa-…
chr1	113256188	G	T	1.15385	1146	PPM1J	ENST00000309276	EJC+miRNA	153	36	0.190476	0.809524	4.25	29:8_25:12_38:7_25:3_19:3_17:3	58	hsa-miR-16-5p:404_hsa-miR-16-5p:549_hsa-miR-16-5p:573_hsa-miR-16-5p:121_hsa-miR-18a-5p:595_hsa-miR-22-3p:165_hsa-miR-23a-3p:0_hsa-miR-24-3p:305_hsa-miR-24-3p:978_hsa-miR-27a-3p:936_hsa-miR-28-5p:141_hsa-miR-29a-3p:963_hsa-miR-30a-5p:516_hsa-miR-95-3p:333_hsa-miR-196a-5p:426_hsa-miR-197-3p:489_hsa-miR-148a-3p:876_hsa-miR-148a-3p:412_hsa-miR-30c-5p:516_hsa-miR-30d-5p:516_hsa-miR-10a-5p:960_hsa-miR-…
chr3	51664918	C	T	0.885714	3608	RAD54L2	ENST00000409535	EJC+miRNA	101	24	0.192	0.808	4.20833	13:3_21:8_10:2_20:1_11:2_26:8	136	hsa-let-7a-5p:3281_hsa-let-7a-3p:973_hsa-let-7b-5p:3281_hsa-let-7d-5p:3281_hsa-let-7e-5p:3281_hsa-let-7f-5p:3281_hsa-miR-16-5p:401_hsa-miR-16-5p:2760_hsa-miR-17-5p:1926_hsa-miR-18a-5p:1448_hsa-miR-18a-5p:1211_hsa-miR-20a-5p:1926_hsa-miR-21-5p:2335_hsa-miR-21-3p:1700_hsa-miR-21-3p:3218_hsa-miR-23a-3p:934_hsa-miR-23a-3p:3583_hsa-miR-24-3p:2870_hsa-miR-25-5p:826_hsa-miR-25-5p:172_hsa-miR-27a-3p:587_…
chr7	101845182	C	T	1.02817	1913	CUX1	ENST00000360264	EJC+miRNA	110	29	0.208633	0.791367	3.7931	29:6_14:2_25:2_15:8_15:4_12:7	80	hsa-let-7a-5p:1658_hsa-let-7b-5p:1658_hsa-let-7d-5p:1658_hsa-let-7e-5p:1658_hsa-let-7f-5p:1658_hsa-miR-21-5p:911_hsa-miR-21-3p:432_hsa-miR-22-3p:401_hsa-miR-22-3p:950_hsa-miR-25-5p:543_hsa-miR-26a-5p:1843_hsa-miR-26b-5p:1843_hsa-miR-29a-3p:806_hsa-miR-29a-3p:1142_hsa-miR-29a-3p:302_hsa-miR-31-5p:888_hsa-miR-98-5p:1658_hsa-miR-103a-2-5p:982_hsa-miR-196a-5p:1657_hsa-miR-10a-5p:429_hsa-miR-10b-5p:42…
chr4	3134345	C	T	0.980769	7136	HTT	ENST00000355072	EJC+miRNA	146	39	0.210811	0.789189	3.74359	23:2_23:5_19:1_26:6_26:14_29:11	313	hsa-let-7a-5p:1413_hsa-let-7a-5p:1349_hsa-let-7a-5p:6219_hsa-let-7a-3p:6754_hsa-let-7b-5p:1349_hsa-let-7b-5p:6219_hsa-let-7b-5p:1413_hsa-let-7d-5p:1413_hsa-let-7d-5p:1349_hsa-let-7d-5p:6219_hsa-let-7e-5p:1413_hsa-let-7e-5p:1349_hsa-let-7e-5p:6219_hsa-let-7f-5p:1413_hsa-let-7f-5p:1349_hsa-let-7f-5p:6219_hsa-miR-16-5p:5281_hsa-miR-16-5p:3227_hsa-miR-16-5p:5498_hsa-miR-16-5p:3206_hsa-miR-16-5p:7091_…
chr21	47685408	C	A	1.10526	2882	MCM3AP	ENST00000291688	EJC+miRNA	401	109	0.213725	0.786275	3.6789	64:20_69:13_59:19_71:16_67:16_71:25	120	hsa-let-7a-3p:1221_hsa-miR-16-5p:1313_hsa-miR-16-5p:1874_hsa-miR-16-5p:2858_hsa-miR-16-5p:285_hsa-miR-16-5p:932_hsa-miR-16-5p:1310_hsa-miR-16-5p:2546_hsa-miR-21-5p:1517_hsa-miR-21-3p:428_hsa-miR-21-3p:1031_hsa-miR-21-3p:273_hsa-miR-22-3p:1382_hsa-miR-22-3p:1391_hsa-miR-22-3p:339_hsa-miR-22-3p:258_hsa-miR-22-3p:929_hsa-miR-22-3p:2747_hsa-miR-24-3p:442_hsa-miR-27a-3p:224_hsa-miR-27a-3p:563_hsa-miR-…
chr1	62908971	C	T	0.894737	1820	USP1	ENST00000339950	EJC+miRNA	244	81	0.249231	0.750769	3.01235	46:9_42:16_32:19_36:10_51:15_37:12	82	hsa-let-7a-5p:169_hsa-let-7b-5p:169_hsa-let-7d-5p:169_hsa-let-7e-5p:169_hsa-let-7f-5p:169_hsa-miR-16-5p:1068_hsa-miR-23a-3p:587_hsa-miR-23a-3p:788_hsa-miR-26a-5p:647_hsa-miR-26b-5p:647_hsa-miR-27a-3p:977_hsa-miR-96-5p:105_hsa-miR-98-5p:169_hsa-miR-101-3p:665_hsa-miR-103a-2-5p:1451_hsa-miR-103a-3p:1067_hsa-miR-107:1067_hsa-miR-192-5p:755_hsa-miR-7-1-3p:1019_hsa-miR-10a-3p:288_hsa-miR-34a-5p:985_hs…
chr21	46603383	G	T	0.85	872	ADARB1	ENST00000360697	EJC+miRNA	87	36	0.292683	0.707317	2.41667	13:7_7:4_12:3_12:9_21:9_22:4	32	hsa-miR-16-5p:296_hsa-miR-18a-5p:429_hsa-miR-19a-3p:325_hsa-miR-19b-3p:325_hsa-miR-24-3p:26_hsa-miR-25-3p:78_hsa-miR-29a-3p:278_hsa-miR-92a-3p:78_hsa-miR-101-3p:663_hsa-miR-103a-2-5p:832_hsa-miR-103a-2-5p:527_hsa-miR-103a-3p:280_hsa-miR-107:280_hsa-miR-192-5p:595_hsa-miR-197-3p:224_hsa-miR-221-5p:539_hsa-miR-15b-5p:296_hsa-miR-145-5p:568_hsa-miR-149-5p:538_hsa-miR-106b-3p:242_hsa-miR-362-5p:618_h…
chr9	711024	G	A	1.09091	3801	KANK1	ENST00000382297	EJC+miRNA	84	36	0.3	0.7	2.33333	17:4_15:6_20:7_5:10_14:5_13:4	159	hsa-miR-16-5p:3279_hsa-miR-16-5p:3163_hsa-miR-16-5p:424_hsa-miR-16-5p:3594_hsa-miR-16-5p:1222_hsa-miR-16-5p:2238_hsa-miR-16-5p:3597_hsa-miR-17-5p:1845_hsa-miR-20a-5p:1845_hsa-miR-21-5p:2495_hsa-miR-21-3p:1951_hsa-miR-22-3p:1015_hsa-miR-22-3p:893_hsa-miR-23a-3p:2955_hsa-miR-23a-3p:3416_hsa-miR-24-3p:506_hsa-miR-25-5p:458_hsa-miR-26a-5p:1598_hsa-miR-26b-5p:1598_hsa-miR-27a-3p:897_hsa-miR-27a-3p:156…
chr8	11162470	C	T	1.27778	1112	MTMR9	ENST00000221086	EJC+miRNA	93	40	0.300752	0.699248	2.325	10:11_15:14_14:5_19:2_27:6_8:2	37	hsa-miR-21-5p:25_hsa-miR-28-5p:642_hsa-miR-101-3p:615_hsa-miR-103a-2-5p:522_hsa-miR-103a-2-5p:224_hsa-miR-103a-2-5p:115_hsa-miR-7-5p:932_hsa-miR-10a-3p:719_hsa-miR-34a-5p:402_hsa-miR-181a-3p:342_hsa-miR-200b-3p:979_hsa-miR-125b-5p:136_hsa-miR-128-3p:938_hsa-miR-140-3p:832_hsa-miR-145-5p:1076_hsa-miR-9-5p:202_hsa-miR-125a-5p:136_hsa-miR-186-5p:701_hsa-miR-200c-3p:979_hsa-miR-130b-5p:559_hsa-miR-13…
chr19	5604818	G	A	1.10526	1436	SAFB2	ENST00000252542	EJC+miRNA	262	115	0.30504	0.69496	2.27826	51:26_51:31_48:17_35:13_37:11_40:17	39	hsa-miR-19a-3p:1291_hsa-miR-19b-3p:1291_hsa-miR-22-3p:578_hsa-miR-22-3p:725_hsa-miR-24-3p:29_hsa-miR-103a-2-5p:354_hsa-miR-10a-5p:1161_hsa-miR-10b-5p:1161_hsa-miR-183-5p:1166_hsa-miR-221-5p:1200_hsa-miR-221-5p:1325_hsa-miR-221-5p:1360_hsa-miR-125b-1-3p:226_hsa-miR-145-5p:1337_hsa-miR-9-5p:346_hsa-miR-149-5p:1359_hsa-miR-320a:46_hsa-miR-106b-3p:64_hsa-miR-130b-5p:348_hsa-miR-130b-5p:395_hsa-miR-13…
chr16	67264256	G	T	0.854545	483	FHOD1	ENST00000258201	EJC+miRNA	588	260	0.306604	0.693396	2.26154	104:53_107:51_91:55_85:32_104:32_97:37	24	hsa-miR-16-5p:358_hsa-miR-22-3p:215_hsa-miR-30a-5p:281_hsa-miR-95-3p:410_hsa-miR-148a-3p:445_hsa-miR-30c-5p:281_hsa-miR-30d-5p:281_hsa-miR-221-5p:111_hsa-miR-15b-5p:358_hsa-miR-30b-5p:281_hsa-miR-30e-5p:281_hsa-miR-378a-3p:208_hsa-miR-151a-5p:345_hsa-miR-148b-3p:445_hsa-miR-345-5p:326_hsa-miR-423-5p:81_hsa-miR-146b-5p:48_hsa-miR-500a-3p:438_hsa-miR-500a-3p:321_hsa-miR-509-5p:323_hsa-miR-532-5p:20…
chr5	141024468	C	T	1.09639	591	FCHSD1	ENST00000435817	EJC+miRNA	334	163	0.327968	0.672032	2.04908	79:31_70:33_78:31_29:16_46:19_32:33	26	hsa-let-7a-5p:426_hsa-let-7b-5p:426_hsa-let-7d-5p:426_hsa-let-7e-5p:426_hsa-let-7f-5p:426_hsa-miR-16-5p:336_hsa-miR-98-5p:426_hsa-miR-103a-3p:242_hsa-miR-103a-3p:383_hsa-miR-107:242_hsa-miR-107:383_hsa-miR-192-5p:5_hsa-miR-196a-5p:425_hsa-miR-7-5p:311_hsa-miR-10a-3p:289_hsa-let-7g-5p:426_hsa-let-7i-5p:426_hsa-miR-15b-5p:336_hsa-miR-145-5p:0_hsa-miR-185-5p:103_hsa-miR-330-3p:68_hsa-miR-196b-5p:425…
chr6	71236265	C	T	1	1070	FAM135A	ENST00000418814	EJC+miRNA	58	30	0.340909	0.659091	1.93333	10:2_10:5_11:5_4:6_15:7_8:5	33	hsa-let-7a-5p:555_hsa-let-7b-5p:555_hsa-let-7d-5p:555_hsa-let-7e-5p:555_hsa-let-7f-5p:555_hsa-miR-18a-5p:597_hsa-miR-21-5p:731_hsa-miR-21-5p:484_hsa-miR-22-3p:683_hsa-miR-98-5p:555_hsa-miR-103a-3p:1046_hsa-miR-107:1046_hsa-miR-7-5p:27_hsa-miR-183-5p:47_hsa-miR-203a:760_hsa-let-7g-5p:555_hsa-let-7i-5p:555_hsa-miR-9-3p:487_hsa-miR-9-3p:843_hsa-miR-186-5p:1035_hsa-miR-320a:842_hsa-miR-320a:486_hsa-m…
chr12	57619366	C	T	1.30189	164	NXPH4	ENST00000349394	miRNA	250	146	0.368687	0.631313	1.71233	50:19_47:20_45:24_38:23_41:32_29:28	10	hsa-miR-96-5p:47_hsa-miR-182-5p:47_hsa-miR-221-5p:28_hsa-miR-149-5p:27_hsa-miR-320a:90_hsa-miR-330-3p:91_hsa-miR-423-3p:13_hsa-miR-500a-3p:107_hsa-miR-320b:90_hsa-miR-1285-3p:121
chr11	62369881	G	A	0.794118	107	EML3	ENST00000529309	miRNA	410	245	0.374046	0.625954	1.67347	53:36_45:34_73:35_89:44_67:49_83:47	1	hsa-miR-224-5p:37
chr5	60827408	C	T	0.973684	1547	ZSWIM6	ENST00000252744	EJC+miRNA	32	20	0.384615	0.615385	1.6	6:3_7:4_4:2_6:3_6:3_3:5	87	hsa-let-7a-5p:1171_hsa-let-7a-5p:232_hsa-let-7b-5p:232_hsa-let-7b-5p:1171_hsa-let-7d-5p:1171_hsa-let-7d-5p:232_hsa-let-7e-5p:1171_hsa-let-7e-5p:232_hsa-let-7f-5p:1171_hsa-let-7f-5p:232_hsa-miR-16-5p:957_hsa-miR-19a-3p:262_hsa-miR-19a-3p:847_hsa-miR-19b-3p:262_hsa-miR-19b-3p:847_hsa-miR-21-5p:71_hsa-miR-21-5p:1283_hsa-miR-22-3p:1161_hsa-miR-22-3p:59_hsa-miR-25-5p:790_hsa-miR-30a-5p:1463_hsa-miR-30…
chr17	27215983	C	T	0.804348	1341	FLOT2	ENST00000394906	EJC+miRNA	527	331	0.385781	0.614219	1.59215	59:53_69:40_69:51_112:55_110:67_108:65	62	hsa-miR-19a-3p:104_hsa-miR-19b-3p:104_hsa-miR-23a-3p:662_hsa-miR-27a-3p:257_hsa-miR-27a-3p:54_hsa-miR-29a-3p:1131_hsa-miR-31-5p:116_hsa-miR-31-5p:122_hsa-miR-96-5p:172_hsa-miR-96-5p:1158_hsa-miR-96-5p:444_hsa-miR-100-5p:262_hsa-miR-103a-2-5p:1089_hsa-miR-103a-3p:1155_hsa-miR-107:1155_hsa-miR-192-5p:1223_hsa-miR-34a-5p:568_hsa-miR-181a-5p:336_hsa-miR-181b-5p:336_hsa-miR-182-5p:444_hsa-miR-182-5p:1…
chr8	12044217	G	C	0.95	340	FAM86B1	ENST00000321602	EJC+miRNA	112	74	0.397849	0.602151	1.51351	19:10_23:12_18:11_20:11_20:12_12:18	6	hsa-miR-28-5p:89_hsa-miR-103a-2-5p:25_hsa-miR-135b-5p:28_hsa-miR-423-3p:150_hsa-miR-423-3p:194_hsa-miR-1285-3p:21
chr5	112200400	G	T	0.962264	41	SRP19	ENST00000515463	miRNA	490	330	0.402439	0.597561	1.48485	84:59_91:59_75:54_72:52_82:56_86:50	2	hsa-miR-24-3p:0_hsa-miR-345-5p:33
chr14	94563265	C	T	1.23077	269	IFI27L1	ENST00000553664	EJC+miRNA	368	255	0.40931	0.59069	1.44314	90:42_64:51_65:33_37:47_52:43_60:39	23	hsa-miR-16-5p:52_hsa-miR-16-5p:205_hsa-miR-22-3p:244_hsa-miR-22-3p:61_hsa-miR-27a-3p:257_hsa-miR-31-3p:153_hsa-miR-96-5p:186_hsa-miR-103a-3p:204_hsa-miR-107:204_hsa-miR-139-5p:56_hsa-miR-182-5p:186_hsa-miR-183-5p:114_hsa-miR-221-3p:57_hsa-miR-222-3p:57_hsa-miR-15b-5p:205_hsa-miR-15b-5p:52_hsa-miR-27b-3p:257_hsa-miR-128-3p:94_hsa-miR-140-3p:66_hsa-miR-145-3p:136_hsa-miR-135b-5p:180_hsa-miR-345-5p:…
chr11	105948536	G	A	1.08571	831	AASDHPPT	ENST00000278618	EJC+miRNA	764	632	0.452722	0.547278	1.20886	171:96_150:114_127:108_103:101_118:121_95:92	38	hsa-miR-16-5p:256_hsa-miR-21-3p:463_hsa-miR-30a-5p:354_hsa-miR-103a-2-5p:382_hsa-miR-103a-3p:255_hsa-miR-107:255_hsa-miR-30c-5p:354_hsa-miR-30d-5p:354_hsa-miR-7-1-3p:619_hsa-miR-10a-3p:496_hsa-miR-10a-3p:210_hsa-miR-203a:212_hsa-miR-181a-3p:645_hsa-miR-15b-5p:256_hsa-miR-30b-5p:354_hsa-miR-125b-1-3p:641_hsa-miR-145-3p:137_hsa-miR-9-3p:386_hsa-miR-186-5p:331_hsa-miR-320a:385_hsa-miR-106b-3p:9_hsa-…
chr7	1785261	C	G	1.20588	1457	ELFN1	ENST00000424383	miRNA	86	75	0.465839	0.534161	1.14667	17:7_23:14_20:5_7:18_8:15_11:16	61	hsa-miR-16-5p:431_hsa-miR-16-5p:767_hsa-miR-22-3p:538_hsa-miR-22-3p:342_hsa-miR-22-3p:1223_hsa-miR-24-3p:1315_hsa-miR-27a-3p:1015_hsa-miR-27a-3p:584_hsa-miR-29a-3p:764_hsa-miR-29a-3p:263_hsa-miR-29a-3p:257_hsa-miR-31-5p:164_hsa-miR-103a-2-5p:313_hsa-miR-103a-3p:766_hsa-miR-103a-3p:1036_hsa-miR-107:1036_hsa-miR-107:766_hsa-miR-192-5p:661_hsa-miR-34a-5p:283_hsa-miR-203a:10_hsa-miR-221-5p:304_hsa-mi…
chr12	122748735	C	T	1.25	1677	VPS33A	ENST00000267199	EJC+miRNA	204	181	0.47013	0.52987	1.12707	35:37_43:34_47:42_26:23_25:22_28:23	90	hsa-let-7a-5p:948_hsa-let-7a-5p:674_hsa-let-7b-5p:948_hsa-let-7b-5p:674_hsa-let-7d-5p:948_hsa-let-7d-5p:674_hsa-let-7e-5p:948_hsa-let-7e-5p:674_hsa-let-7f-5p:948_hsa-let-7f-5p:674_hsa-miR-16-5p:1389_hsa-miR-17-5p:1450_hsa-miR-19a-3p:689_hsa-miR-19a-3p:32_hsa-miR-19b-3p:689_hsa-miR-19b-3p:32_hsa-miR-20a-5p:1450_hsa-miR-21-3p:1101_hsa-miR-22-3p:747_hsa-miR-22-3p:103_hsa-miR-23a-3p:665_hsa-miR-23a-3…
chr6	26459903	C	T	0.810127	1307	BTN2A1	ENST00000312541	EJC+miRNA	130	119	0.477912	0.522088	1.09244	27:21_24:18_17:18_17:23_24:21_21:18	51	hsa-miR-18a-5p:11_hsa-miR-27a-3p:361_hsa-miR-27a-3p:1171_hsa-miR-27a-3p:340_hsa-miR-139-5p:929_hsa-miR-7-5p:1078_hsa-miR-7-5p:745_hsa-miR-203a:174_hsa-miR-181a-3p:678_hsa-miR-27b-3p:361_hsa-miR-27b-3p:1171_hsa-miR-27b-3p:340_hsa-miR-125b-5p:561_hsa-miR-125b-5p:870_hsa-miR-128-3p:918_hsa-miR-140-3p:710_hsa-miR-140-3p:485_hsa-miR-141-3p:939_hsa-miR-145-5p:611_hsa-miR-9-5p:237_hsa-miR-125a-5p:561_hs…
chr19	18307108	C	T	0.907895	152	MPV17L2	ENST00000599612	miRNA	189	176	0.482192	0.517808	1.07386	21:30_35:27_31:24_38:26_28:37_36:32	8	hsa-miR-27a-3p:4_hsa-miR-96-5p:44_hsa-miR-34a-5p:76_hsa-miR-182-5p:44_hsa-miR-183-5p:78_hsa-miR-27b-3p:4_hsa-miR-339-5p:31_hsa-miR-423-5p:67
chr19	56090157	C	T	0.903226	838	ZNF579	ENST00000325421	miRNA	250	239	0.488753	0.511247	1.04603	60:49_49:40_47:39_40:36_29:34_25:41	42	hsa-let-7a-5p:83_hsa-let-7b-5p:83_hsa-let-7d-5p:83_hsa-let-7e-5p:83_hsa-let-7f-5p:83_hsa-miR-25-5p:87_hsa-miR-25-5p:69_hsa-miR-98-5p:83_hsa-miR-196a-5p:82_hsa-miR-148a-3p:572_hsa-miR-7-5p:726_hsa-let-7g-5p:83_hsa-let-7i-5p:83_hsa-miR-185-5p:685_hsa-miR-106b-3p:312_hsa-miR-106b-3p:216_hsa-miR-106b-3p:387_hsa-miR-148b-3p:572_hsa-miR-196b-5p:82_hsa-miR-423-5p:656_hsa-miR-423-5p:113_hsa-miR-423-3p:62…
chr12	58017860	G	A	0.912281	486	SLC26A10	ENST00000320442	EJC+miRNA	67	66	0.496241	0.503759	1.01515	13:15_19:10_8:8_10:11_11:12_6:10	34	hsa-miR-16-5p:229_hsa-miR-16-5p:406_hsa-miR-18a-5p:216_hsa-miR-22-3p:403_hsa-miR-24-3p:177_hsa-miR-25-5p:296_hsa-miR-103a-3p:228_hsa-miR-107:228_hsa-miR-148a-3p:466_hsa-miR-10a-5p:186_hsa-miR-10a-5p:363_hsa-miR-10b-5p:363_hsa-miR-10b-5p:186_hsa-miR-221-5p:458_hsa-miR-15b-5p:229_hsa-miR-15b-5p:406_hsa-miR-125b-5p:185_hsa-miR-125a-5p:185_hsa-miR-149-5p:149_hsa-miR-149-5p:457_hsa-miR-342-3p:387_hsa-…
chr17	36894839	G	A	0.822785	335	PCGF2	ENST00000579882	EJC+miRNA	640	671	0.511823	0.488177	0.9538	103:112_81:104_91:101_131:115_118:127_116:112	16	hsa-miR-31-5p:94_hsa-miR-96-5p:96_hsa-miR-182-5p:96_hsa-miR-149-5p:254_hsa-miR-185-5p:230_hsa-miR-130b-5p:37_hsa-miR-378a-3p:250_hsa-miR-135b-5p:75_hsa-miR-331-3p:47_hsa-miR-339-5p:46_hsa-miR-423-5p:235_hsa-miR-423-5p:294_hsa-miR-484:258_hsa-miR-1285-3p:126_hsa-miR-1285-3p:68_hsa-miR-3909:157
chr1	244217659	C	T	0.962025	1013	ZNF238	ENST00000358704	miRNA	25	27	0.519231	0.480769	0.925926	4:8_5:4_5:5_4:1_2:5_5:4	49	hsa-miR-22-3p:91_hsa-miR-22-3p:63_hsa-miR-24-3p:532_hsa-miR-24-3p:802_hsa-miR-24-3p:371_hsa-miR-27a-3p:911_hsa-miR-27a-3p:281_hsa-miR-27a-3p:331_hsa-miR-31-5p:956_hsa-miR-31-3p:324_hsa-miR-101-3p:962_hsa-miR-103a-2-5p:748_hsa-miR-103a-2-5p:832_hsa-miR-103a-2-5p:240_hsa-miR-197-3p:919_hsa-miR-148a-3p:328_hsa-miR-148a-3p:948_hsa-miR-7-5p:577_hsa-miR-10a-5p:359_hsa-miR-10b-5p:359_hsa-miR-27b-3p:911_…
chr22	50705304	C	T	1.15625	297	MAPK11	ENST00000449719	miRNA	51	58	0.53211	0.46789	0.87931	5:10_10:14_23:12_7:11_2:8_4:3	11	hsa-miR-22-3p:117_hsa-miR-23a-3p:191_hsa-miR-29a-3p:95_hsa-miR-181a-5p:41_hsa-miR-181b-5p:41_hsa-miR-221-5p:9_hsa-miR-23b-3p:191_hsa-miR-128-3p:196_hsa-miR-423-5p:246_hsa-miR-1301-3p:282_hsa-miR-769-5p:202
chr19	48737706	A	T	0.695652	1266	CARD8	ENST00000359009	EJC+miRNA	16	25	0.609756	0.390244	0.64	0:1_2:2_1:2_5:6_7:7_1:7	37	hsa-let-7a-5p:1231_hsa-let-7b-5p:1231_hsa-let-7d-5p:1231_hsa-let-7e-5p:1231_hsa-let-7f-5p:1231_hsa-miR-26a-5p:897_hsa-miR-26b-5p:897_hsa-miR-29a-3p:1062_hsa-miR-98-5p:1231_hsa-miR-103a-2-5p:1207_hsa-miR-103a-3p:557_hsa-miR-107:557_hsa-miR-192-5p:266_hsa-miR-10a-3p:1257_hsa-miR-221-5p:1039_hsa-miR-221-3p:969_hsa-miR-222-3p:969_hsa-let-7g-5p:1231_hsa-let-7i-5p:1231_hsa-miR-140-3p:227_hsa-miR-149-5p…
chr1	41236378	C	T	0.888889	122	NFYC	ENST00000308733	miRNA	121	194	0.615873	0.384127	0.623711	20:32_21:31_17:47_24:27_19:32_20:25	4	hsa-miR-22-3p:2_hsa-miR-221-5p:40_hsa-miR-345-5p:70_hsa-miR-1285-3p:51
chr11	82643413	C	T	0.902439	1964	C11orf82	ENST00000430323	miRNA	24	39	0.619048	0.380952	0.615385	2:2_1:7_2:3_8:10_7:10_4:7	77	hsa-miR-17-5p:1132_hsa-miR-18a-5p:1912_hsa-miR-18a-5p:142_hsa-miR-20a-5p:1132_hsa-miR-21-3p:1488_hsa-miR-25-3p:882_hsa-miR-26a-5p:158_hsa-miR-26b-5p:158_hsa-miR-27a-3p:352_hsa-miR-28-3p:675_hsa-miR-92a-3p:882_hsa-miR-93-5p:1132_hsa-miR-103a-2-5p:1470_hsa-miR-103a-3p:1634_hsa-miR-106a-5p:1132_hsa-miR-107:1634_hsa-miR-197-3p:188_hsa-miR-139-5p:434_hsa-miR-7-1-3p:1269_hsa-miR-7-1-3p:1067_hsa-miR-10a…
chr16	90110950	C	T	0.810811	445	AC133919.6	ENST00000517889	miRNA	75	161	0.682203	0.317797	0.465839	16:34_15:35_8:30_14:21_9:18_13:23	14	hsa-miR-22-3p:266_hsa-miR-27a-3p:270_hsa-miR-148a-3p:364_hsa-miR-34a-5p:366_hsa-miR-27b-3p:270_hsa-miR-125b-5p:205_hsa-miR-128-3p:416_hsa-miR-140-3p:418_hsa-miR-125a-5p:205_hsa-miR-106b-3p:386_hsa-miR-330-3p:193_hsa-miR-148b-3p:364_hsa-miR-1301-3p:163_hsa-miR-1285-3p:65
chr10	88719795	C	T	0.988764	128	SNCG	ENST00000348795	EJC+miRNA	694	1707	0.710954	0.289046	0.406561	151:379_133:355_121:353_88:213_109:199_92:208	6	hsa-miR-26a-5p:95_hsa-miR-26b-5p:95_hsa-miR-197-3p:8_hsa-miR-128-3p:25_hsa-miR-140-3p:6_hsa-miR-3909:91
Candidates highlighted in yellow are selected for experimental validation.
Candidates that contain at least one positive miRE are in red font.
