# Supplementary material for: MicroRNA-mediated repression of nonsense mRNAs
Source: eLife. 2014 Aug 8;3:e03032. doi: 10.7554/eLife.03032 (PMC4359369; doi:10.7554/eLife.03032)
Supplement: Supplementary file 3. — Transcriptome-wide identification of nonsense mRNAs caused by intron retention in HEK293 and HeLa cells. The isoform with the highest transcript abundance in each gene family was chosen as the constitutive isoform. All intron-retention (IR) isoforms with an intron retention level >0.05 were then found by using MATS. Only PTC-causing IR candidates with Ago-CLIP hits in their PTC-STOP regions were listed. miREs were predicted in the PTC-STOP region using the 2–7 seed match rule. Candidates were subdivided into EJC-NMD-sensitive and/or miRNA-mediated surveillance-sensitive groups. DOI: http://dx.doi.org/10.7554/eLife.03032.019 [file elife03032s003.xlsx]

## Sheet: HEK293
Chrom.	Loc.	Length of PTC-STOP region	Transcript Name	Transcript ID	NMD Type	Reads of Skip IR	Reads of IR	% IR Level	Total Predicted miREs	miRE
chr12	125397780-125398008	1746	UBC	ENST00000546120	miRNA	1	4636	1	34	hsa-miR-29a-3p;hsa-miR-301a-5p;hsa-miR-130b-5p;hsa-miR-151a-3p;hsa-miR-1260b;hsa-miR-181a-5p;hsa-miR-181b-5p;hsa-miR-181d-5p;hsa-miR-18a-5p;hsa-miR-19a-3p;hsa-miR-19b-3p;hsa-miR-301a-5p;hsa-miR-450b-5p;hsa-miR-1260b;hsa-miR-365b-3p;hsa-miR-532-5p;hsa-miR-29a-3p;hsa-miR-301a-5p;hsa-miR-130b-5p;hsa-miR-151a-3p;hsa-miR-1260b;hsa-miR-29a-3p;hsa-miR-29a-3p;hsa-miR-29a-3p;hsa-miR-301a-5p;hsa-miR-130b-5…
chr3	112299553-112300025	589	SLC35A5	ENST00000261034	miRNA	1	209	0.991	2	hsa-miR-186-5p;hsa-miR-365b-3p
chr11	93517793-93517883	1839	MED17	ENST00000427225	EJC+miRNA	2	50	0.891	14	hsa-miR-15a-5p;hsa-miR-16-5p;hsa-miR-15b-5p;hsa-miR-340-5p;hsa-miR-424-5p;hsa-miR-503-5p;hsa-miR-454-3p;hsa-miR-183-5p;hsa-miR-186-5p;hsa-miR-197-3p;hsa-miR-140-3p;hsa-miR-146b-5p;hsa-miR-589-5p;hsa-miR-590-3p
chr9	139887152-139887376	406	C9orf142	ENST00000371620	EJC+miRNA	12	233	0.882	3	hsa-miR-378a-5p;hsa-miR-378a-3p;hsa-miR-345-5p
chr19	53116934-53117018	750	ZNF83	ENST00000434535	EJC+miRNA	3	35	0.867	2	hsa-miR-590-3p;hsa-miR-3613-5p
chr3	52440338-52440844	1901	BAP1	ENST00000296288	EJC+miRNA	7	95	0.831	5	hsa-miR-17-3p;hsa-miR-103a-3p;hsa-miR-107;hsa-miR-1301-3p;hsa-miR-18a-5p
chrX	134703356-134706739	4616	DDX26B	ENST00000370752	EJC+miRNA	3	25	0.806	3	hsa-miR-96-5p;hsa-miR-182-5p;hsa-miR-1271-5p
chr12	54675286-54675578	1042	HNRNPA1	ENST00000547566	EJC+miRNA	22	118	0.728	7	hsa-miR-3613-5p;hsa-miR-4286;hsa-miR-1260b;hsa-miR-9-5p;hsa-miR-130b-5p;hsa-miR-590-3p;hsa-miR-128-3p
chr6	28327765-28329100	2415	ZKSCAN3	ENST00000252211	EJC+miRNA	5	22	0.688	3	hsa-miR-10a-3p;hsa-miR-125b-5p;hsa-miR-125a-5p
chr15	74326871-74327512	1295	PML	ENST00000268059	miRNA	6	34	0.664	1	hsa-miR-378a-3p
chr14	45565431-45566089	2014	PRPF39	ENST00000355765	EJC+miRNA	19	62	0.62	37	hsa-miR-197-3p;hsa-miR-106b-3p;hsa-miR-374a-5p;hsa-miR-486-5p;hsa-miR-374b-5p;hsa-miR-3613-5p;hsa-let-7a-5p;hsa-let-7c-5p;hsa-let-7d-5p;hsa-let-7e-5p;hsa-let-7f-5p;hsa-miR-26a-5p;hsa-miR-26b-5p;hsa-miR-98-5p;hsa-miR-197-3p;hsa-let-7g-5p;hsa-let-7i-5p;hsa-miR-221-5p;hsa-miR-149-5p;hsa-miR-22-3p;hsa-miR-9-5p;hsa-miR-500a-3p;hsa-miR-501-3p;hsa-miR-502-3p;hsa-miR-629-5p;hsa-miR-374a-5p;hsa-miR-374b-5…
chr12	661694-662359	2381	B4GALNT3	ENST00000266383	EJC+miRNA	3	11	0.589	9	hsa-miR-15a-5p;hsa-miR-16-5p;hsa-miR-103a-3p;hsa-miR-107;hsa-miR-15b-5p;hsa-miR-424-5p;hsa-miR-503-5p;hsa-miR-455-3p;hsa-miR-3909
chr6	41751343-41751868	1464	PRICKLE4	ENST00000335515	EJC+miRNA	10	27	0.574	1	hsa-miR-17-3p
chr22	38884120-38888060	4639	DDX17	ENST00000396821	EJC+miRNA	390	1355	0.57	19	hsa-miR-192-5p;hsa-miR-18a-5p;hsa-miR-186-5p;hsa-miR-425-5p;hsa-miR-22-3p;hsa-miR-140-5p;hsa-miR-218-5p;hsa-miR-15a-5p;hsa-miR-16-5p;hsa-miR-22-3p;hsa-miR-15b-5p;hsa-miR-424-5p;hsa-miR-503-5p;hsa-miR-149-5p;hsa-miR-1260b;hsa-miR-19a-3p;hsa-miR-19b-3p;hsa-miR-423-5p;hsa-miR-7974
chr6	99851758-99852478	1986	PNISR	ENST00000438806	EJC+miRNA	124	428	0.549	3	hsa-miR-196a-5p;hsa-miR-196b-5p;hsa-miR-9-5p
chr16	67863991-67864292	1072	CENPT	ENST00000219172	EJC+miRNA	80	178	0.527	9	hsa-miR-10a-5p;hsa-miR-10b-5p;hsa-miR-15a-5p;hsa-miR-16-5p;hsa-miR-103a-3p;hsa-miR-107;hsa-miR-15b-5p;hsa-miR-424-5p;hsa-miR-503-5p
chr9	139887426-139887504	459	C9orf142	ENST00000371620	EJC+miRNA	106	193	0.524	3	hsa-miR-378a-5p;hsa-miR-378a-3p;hsa-miR-345-5p
chrX	70764485-70767756	5869	OGT	ENST00000373719	EJC+miRNA	117	299	0.517	16	hsa-miR-28-5p;hsa-miR-708-5p;hsa-miR-99a-5p;hsa-miR-100-5p;hsa-miR-101-3p;hsa-miR-183-5p;hsa-miR-99b-5p;hsa-miR-146b-5p;hsa-miR-582-5p;hsa-miR-589-5p;hsa-miR-374a-5p;hsa-miR-374b-5p;hsa-miR-18a-5p;hsa-miR-3613-5p;hsa-miR-361-5p;hsa-miR-486-5p
chr3	49758327-49758452	251	RNF123	ENST00000327697	EJC+miRNA	61	123	0.491	2	hsa-miR-455-3p;hsa-miR-3909
chr22	50689334-50689402	1976	HDAC10	ENST00000216271	EJC+miRNA	11	15	0.49	5	hsa-miR-148a-3p;hsa-miR-152-3p;hsa-miR-148b-3p;hsa-miR-23a-3p;hsa-miR-23b-3p
chr14	24032711-24032792	1095	AP1G2	ENST00000397120	EJC+miRNA	18	38	0.479	5	hsa-miR-17-3p;hsa-miR-29a-3p;hsa-miR-103a-3p;hsa-miR-107;hsa-miR-1301-3p
chr14	24035101-24035272	1868	AP1G2	ENST00000397120	EJC+miRNA	45	80	0.444	5	hsa-miR-17-3p;hsa-miR-29a-3p;hsa-miR-103a-3p;hsa-miR-107;hsa-miR-1301-3p
chr3	50138038-50140515	4345	RBM5	ENST00000347869	EJC+miRNA	72	137	0.434	3	hsa-miR-629-5p;hsa-miR-7974;hsa-miR-339-5p
chr16	70500857-70501276	3186	FUK	ENST00000288078	EJC+miRNA	6	10	0.42	5	hsa-miR-140-3p;hsa-miR-126-3p;hsa-miR-484;hsa-miR-500a-3p;hsa-miR-7974
chr22	29684775-29687553	3768	EWSR1	ENST00000406548	EJC+miRNA	44	125	0.411	16	hsa-miR-3909;hsa-miR-3909;hsa-miR-181a-5p;hsa-miR-181b-5p;hsa-miR-301a-5p;hsa-miR-181d-5p;hsa-miR-96-5p;hsa-miR-182-5p;hsa-miR-1271-5p;hsa-miR-196a-5p;hsa-miR-196b-5p;hsa-miR-25-3p;hsa-miR-92a-3p;hsa-miR-362-5p;hsa-miR-363-3p;hsa-miR-92b-3p
chr19	10822975-10823228	571	QTRT1	ENST00000250237	EJC+miRNA	79	123	0.409	3	hsa-miR-23a-3p;hsa-miR-7-5p;hsa-miR-23b-3p
chr1	40922743-40923015	1439	ZNF643	ENST00000411995	EJC+miRNA	3	4	0.4	1	hsa-miR-18a-5p
chr19	8386587-8386836	324	RPS28	ENST00000417088	miRNA	21	42	0.392	1	hsa-miR-345-5p
chr7	150774323-150774396	384	FASTK	ENST00000297532	EJC+miRNA	140	136	0.387	1	hsa-miR-941
chrX	48934409-48935495	1767	WDR45	ENST00000485908	EJC+miRNA	37	48	0.364	1	hsa-miR-484
chr14	70235968-70237183	1646	SRSF5	ENST00000557154	EJC+miRNA	454	759	0.361	7	hsa-miR-192-5p;hsa-miR-450a-5p;hsa-miR-769-5p;hsa-miR-769-5p;hsa-miR-7974;hsa-miR-196a-5p;hsa-miR-196b-5p
chrX	54953058-54953475	2895	TRO	ENST00000173898	EJC+miRNA	6	48	0.343	1	hsa-miR-320a
chr19	49464171-49464788	718	BAX	ENST00000345358	miRNA	354	368	0.342	2	hsa-miR-26a-5p;hsa-miR-26b-5p
chr1	109823668-109823758	427	PSRC1	ENST00000369909	EJC+miRNA	45	45	0.341	1	hsa-miR-7974
chr7	102963079-102963149	1078	DNAJC2	ENST00000379263	EJC+miRNA	75	55	0.333	3	hsa-miR-361-5p;hsa-miR-374a-3p;hsa-miR-7-5p
chr12	95451654-95452085	1682	NR2C1	ENST00000333003	EJC+miRNA	114	113	0.331	11	hsa-miR-17-5p;hsa-miR-20a-5p;hsa-miR-93-5p;hsa-miR-148a-3p;hsa-miR-152-3p;hsa-miR-186-5p;hsa-miR-106b-5p;hsa-miR-148b-3p;hsa-miR-454-3p;hsa-miR-9-3p;hsa-miR-320a
chr12	56716542-56716845	1347	PAN2	ENST00000440411	EJC+miRNA	57	54	0.321	6	hsa-miR-196a-5p;hsa-miR-196b-5p;hsa-miR-196a-5p;hsa-miR-151a-3p;hsa-miR-196b-5p;hsa-miR-590-3p
chr6	26444532-26445931	2674	BTN3A3	ENST00000244519	EJC+miRNA	13	12	0.316	7	hsa-miR-17-5p;hsa-miR-20a-5p;hsa-miR-93-5p;hsa-miR-148a-3p;hsa-miR-152-3p;hsa-miR-106b-5p;hsa-miR-148b-3p
chr6	43592799-43593099	1350	GTPBP2	ENST00000307126	EJC+miRNA	98	90	0.315	1	hsa-miR-18a-5p
chr8	146054475-146054862	2403	ZNF7	ENST00000325241	EJC+miRNA	19	27	0.314	7	hsa-miR-18a-5p;hsa-miR-24-3p;hsa-miR-342-3p;hsa-miR-19a-3p;hsa-miR-19b-3p;hsa-miR-3065-5p;hsa-miR-183-5p
chr2	174228623-174229522	1430	CDCA7	ENST00000347703	EJC+miRNA	198	192	0.305	6	hsa-miR-181a-5p;hsa-miR-181b-5p;hsa-miR-181d-5p;hsa-miR-501-3p;hsa-miR-502-3p;hsa-miR-941
chr11	46564531-46564801	3042	AMBRA1	ENST00000533727	EJC+miRNA	50	43	0.301	10	hsa-miR-28-5p;hsa-miR-505-3p;hsa-miR-708-5p;hsa-miR-10a-5p;hsa-miR-10b-5p;hsa-miR-125b-5p;hsa-miR-125a-5p;hsa-miR-10a-5p;hsa-miR-10b-5p;hsa-miR-339-5p
chr14	24031802-24032588	1713	AP1G2	ENST00000397120	EJC+miRNA	51	44	0.298	5	hsa-miR-17-3p;hsa-miR-29a-3p;hsa-miR-103a-3p;hsa-miR-107;hsa-miR-1301-3p
chr6	163984751-163986977	2226	QKI	ENST00000361758	miRNA	26	22	0.297	4	hsa-miR-365b-3p;hsa-miR-18a-5p;hsa-miR-19a-3p;hsa-miR-19b-3p
chr3	108366959-108367764	2464	DZIP3	ENST00000361582	EJC+miRNA	22	30	0.295	1	hsa-miR-339-5p
chr2	100018809-100019106	471	REV1	ENST00000258428	EJC+miRNA	88	73	0.293	3	hsa-miR-218-5p;hsa-miR-378a-3p;hsa-miR-3613-5p
chr22	20077334-20077498	1427	DGCR8	ENST00000351989	EJC+miRNA	115	94	0.29	1	hsa-miR-548k
chr14	73566458-73569899	5023	RBM25	ENST00000261973	EJC+miRNA	168	144	0.288	9	hsa-miR-196a-5p;hsa-miR-196b-5p;hsa-miR-17-5p;hsa-miR-20a-5p;hsa-miR-93-5p;hsa-miR-106b-5p;hsa-miR-96-5p;hsa-miR-182-5p;hsa-miR-1271-5p
chr2	97215542-97215924	1333	ARID5A	ENST00000357485	EJC+miRNA	15	17	0.283	2	hsa-miR-339-5p;hsa-miR-486-5p
chr6	31938602-31938688	559	DOM3Z	ENST00000375356	EJC+miRNA	81	58	0.28	4	hsa-miR-378a-3p;hsa-miR-18a-5p;hsa-miR-484;hsa-miR-378a-5p
chr9	134385383-134385646	1550	POMT1	ENST00000402686	EJC+miRNA	47	36	0.277	4	hsa-miR-196a-5p;hsa-miR-7-5p;hsa-miR-140-5p;hsa-miR-196b-5p
chr8	144663324-144663455	581	EEF1D	ENST00000526838	EJC+miRNA	23	29	0.271	5	hsa-miR-148a-3p;hsa-miR-152-3p;hsa-miR-148b-3p;hsa-miR-484;hsa-miR-454-3p
chr14	24034910-24035024	1815	AP1G2	ENST00000397120	EJC+miRNA	70	51	0.267	5	hsa-miR-17-3p;hsa-miR-29a-3p;hsa-miR-103a-3p;hsa-miR-107;hsa-miR-1301-3p
chr15	91500130-91500342	698	RCCD1	ENST00000394258	EJC+miRNA	46	33	0.264	1	hsa-miR-340-5p
chr4	2934485-2934832	1350	MFSD10	ENST00000514800	EJC+miRNA	153	110	0.264	14	hsa-let-7a-5p;hsa-let-7c-5p;hsa-let-7d-5p;hsa-let-7e-5p;hsa-let-7f-5p;hsa-miR-98-5p;hsa-miR-196a-5p;hsa-miR-7-5p;hsa-let-7g-5p;hsa-let-7i-5p;hsa-miR-151a-3p;hsa-miR-196b-5p;hsa-miR-103a-3p;hsa-miR-107
chr11	134129639-134130937	1424	ACAD8	ENST00000537915	EJC+miRNA	81	58	0.264	1	hsa-miR-1180-3p
chr15	85189067-85189414	895	WDR73	ENST00000434634	EJC+miRNA	200	141	0.261	8	hsa-miR-18a-5p;hsa-miR-15a-5p;hsa-miR-16-5p;hsa-miR-103a-3p;hsa-miR-107;hsa-miR-15b-5p;hsa-miR-424-5p;hsa-miR-503-5p
chr22	50636424-50636503	331	TRABD	ENST00000380909	EJC+miRNA	242	142	0.259	3	hsa-miR-484;hsa-miR-7974;hsa-miR-423-3p
chr1	228289866-228290010	470	C1orf35	ENST00000272139	EJC+miRNA	52	44	0.256	3	hsa-miR-218-5p;hsa-miR-185-5p;hsa-miR-130b-5p
chr6	43410897-43411670	2737	ABCC10	ENST00000372530	EJC+miRNA	16	12	0.253	14	hsa-miR-29a-3p;hsa-miR-29a-3p;hsa-miR-941;hsa-let-7a-5p;hsa-let-7c-5p;hsa-let-7d-5p;hsa-let-7e-5p;hsa-let-7f-5p;hsa-miR-98-5p;hsa-miR-196a-5p;hsa-let-7g-5p;hsa-let-7i-5p;hsa-miR-191-5p;hsa-miR-196b-5p
chr6	31938255-31938382	434	DOM3Z	ENST00000375356	EJC+miRNA	98	66	0.252	4	hsa-miR-378a-3p;hsa-miR-18a-5p;hsa-miR-484;hsa-miR-378a-5p
chr19	58002965-58003480	1613	ZNF419	ENST00000221735	EJC+miRNA	17	11	0.244	9	hsa-miR-181a-5p;hsa-miR-181b-5p;hsa-miR-186-5p;hsa-miR-181d-5p;hsa-miR-1260b;hsa-miR-181a-5p;hsa-miR-181b-5p;hsa-miR-181d-5p;hsa-miR-590-3p
chr15	91455509-91455771	1219	MAN2A2	ENST00000559717	EJC+miRNA	73	46	0.24	3	hsa-miR-148a-5p;hsa-miR-27a-3p;hsa-miR-27b-3p
chr1	205492425-205492610	1385	CDK18	ENST00000360066	EJC+miRNA	16	10	0.238	1	hsa-miR-18a-5p
chr1	145508075-145508209	525	RBM8A	ENST00000369307	EJC+miRNA	41	44	0.237	9	hsa-miR-15a-5p;hsa-miR-16-5p;hsa-miR-95-3p;hsa-miR-221-5p;hsa-miR-15b-5p;hsa-miR-424-5p;hsa-miR-503-5p;hsa-miR-505-3p;hsa-miR-7974
chr22	39136437-39137011	1439	SUN2	ENST00000216064	EJC+miRNA	37	38	0.236	4	hsa-miR-17-5p;hsa-miR-20a-5p;hsa-miR-93-5p;hsa-miR-106b-5p
chr3	47048840-47049014	1101	NBEAL2	ENST00000450053	EJC+miRNA	31	19	0.235	16	hsa-let-7a-5p;hsa-let-7c-5p;hsa-let-7d-5p;hsa-let-7e-5p;hsa-let-7f-5p;hsa-miR-19a-3p;hsa-miR-19b-3p;hsa-miR-98-5p;hsa-miR-196a-5p;hsa-miR-148a-3p;hsa-let-7g-5p;hsa-let-7i-5p;hsa-miR-152-3p;hsa-miR-148b-3p;hsa-miR-196b-5p;hsa-miR-454-3p
chr12	124092070-124092146	1539	DDX55	ENST00000238146	EJC+miRNA	79	47	0.234	13	hsa-miR-505-3p;hsa-miR-421;hsa-miR-3065-5p;hsa-miR-25-3p;hsa-miR-92a-3p;hsa-miR-363-3p;hsa-miR-92b-3p;hsa-miR-501-3p;hsa-miR-502-3p;hsa-miR-197-3p;hsa-miR-769-5p;hsa-miR-941;hsa-miR-1180-3p
chr1	161134402-161134624	534	USP21	ENST00000289865	EJC+miRNA	94	62	0.231	1	hsa-miR-24-3p
chr12	124092209-124093226	2351	DDX55	ENST00000238146	EJC+miRNA	120	71	0.228	13	hsa-miR-505-3p;hsa-miR-421;hsa-miR-3065-5p;hsa-miR-25-3p;hsa-miR-92a-3p;hsa-miR-363-3p;hsa-miR-92b-3p;hsa-miR-501-3p;hsa-miR-502-3p;hsa-miR-197-3p;hsa-miR-769-5p;hsa-miR-941;hsa-miR-1180-3p
chr14	24033065-24033254	1231	AP1G2	ENST00000397120	EJC+miRNA	65	38	0.226	5	hsa-miR-17-3p;hsa-miR-29a-3p;hsa-miR-103a-3p;hsa-miR-107;hsa-miR-1301-3p
chr12	56663035-56663243	421	COQ10A	ENST00000433805	EJC+miRNA	89	51	0.223	7	hsa-miR-148a-3p;hsa-miR-128-3p;hsa-miR-152-3p;hsa-miR-151a-5p;hsa-miR-148b-3p;hsa-miR-151b;hsa-miR-454-3p
chr2	37468934-37469777	1524	C2orf56	ENST00000002125	EJC+miRNA	37	28	0.222	12	hsa-let-7a-5p;hsa-let-7c-5p;hsa-let-7d-5p;hsa-let-7e-5p;hsa-let-7f-5p;hsa-miR-98-5p;hsa-miR-196a-5p;hsa-let-7g-5p;hsa-let-7i-5p;hsa-miR-301a-5p;hsa-miR-196b-5p;hsa-miR-660-5p
chr17	5012347-5012688	1016	ZNF232	ENST00000250076	EJC+miRNA	30	16	0.211	3	hsa-miR-196a-5p;hsa-miR-196b-5p;hsa-miR-340-5p
chr1	100606070-100606407	1255	CCDC76	ENST00000370141	EJC+miRNA	64	34	0.21	5	hsa-miR-9-3p;hsa-miR-19a-3p;hsa-miR-19b-3p;hsa-miR-365b-3p;hsa-miR-454-3p
chr3	100064522-100065024	874	NIT2	ENST00000394140	EJC+miRNA	106	64	0.21	1	hsa-miR-185-5p
chr20	34326939-34328745	3303	RBM39	ENST00000253363	EJC+miRNA	69	129	0.207	26	hsa-miR-92a-1-5p;hsa-miR-378a-5p;hsa-miR-218-5p;hsa-miR-9-5p;hsa-miR-140-5p;hsa-miR-374a-5p;hsa-miR-374b-5p;hsa-miR-140-5p;hsa-miR-22-3p;hsa-miR-9-3p;hsa-miR-25-5p;hsa-miR-218-5p;hsa-miR-17-3p;hsa-miR-22-3p;hsa-miR-103a-3p;hsa-miR-107;hsa-miR-1301-3p;hsa-let-7a-5p;hsa-let-7c-5p;hsa-let-7d-5p;hsa-let-7e-5p;hsa-let-7f-5p;hsa-miR-98-5p;hsa-miR-7-5p;hsa-let-7g-5p;hsa-let-7i-5p
chr1	41474386-41474465	361	CTPS	ENST00000372621	EJC+miRNA	398	218	0.201	10	hsa-let-7a-5p;hsa-let-7c-5p;hsa-let-7d-5p;hsa-let-7e-5p;hsa-let-7f-5p;hsa-miR-98-5p;hsa-let-7g-5p;hsa-let-7i-5p;hsa-miR-548k;hsa-miR-4286
chr1	110031722-110032551	1951	ATXN7L2	ENST00000369870	EJC+miRNA	18	9	0.2	3	hsa-miR-140-5p;hsa-miR-1296-5p;hsa-miR-183-5p
chr20	62577328-62577513	1375	UCKL1	ENST00000354216	EJC+miRNA	77	38	0.198	1	hsa-miR-548k
chr9	95475743-95477534	1698	BICD2	ENST00000375512	miRNA	76	37	0.196	8	hsa-miR-378a-5p;hsa-miR-450b-5p;hsa-miR-615-3p;hsa-miR-25-3p;hsa-miR-92a-3p;hsa-miR-363-3p;hsa-miR-92b-3p;hsa-miR-769-5p
chr1	228290083-228290178	332	C1orf35	ENST00000272139	EJC+miRNA	88	54	0.195	3	hsa-miR-218-5p;hsa-miR-185-5p;hsa-miR-130b-5p
chr3	50327059-50327142	771	IFRD2	ENST00000429673	EJC+miRNA	56	34	0.195	22	hsa-miR-15a-5p;hsa-miR-16-5p;hsa-miR-17-3p;hsa-miR-103a-3p;hsa-miR-107;hsa-miR-15b-5p;hsa-miR-365b-3p;hsa-miR-424-5p;hsa-miR-503-5p;hsa-miR-1296-5p;hsa-miR-17-3p;hsa-miR-3909;hsa-miR-615-3p;hsa-miR-15a-5p;hsa-miR-16-5p;hsa-miR-103a-3p;hsa-miR-103a-3p;hsa-miR-107;hsa-miR-107;hsa-miR-15b-5p;hsa-miR-424-5p;hsa-miR-503-5p
chr1	243349374-243349560	3666	CEP170	ENST00000366542	EJC+miRNA	143	69	0.194	19	hsa-miR-374a-5p;hsa-miR-374b-5p;hsa-miR-96-5p;hsa-miR-182-5p;hsa-miR-1271-5p;hsa-miR-22-3p;hsa-miR-629-5p;hsa-miR-7-5p;hsa-miR-378a-5p;hsa-miR-590-3p;hsa-let-7a-5p;hsa-let-7c-5p;hsa-let-7d-5p;hsa-let-7e-5p;hsa-let-7f-5p;hsa-miR-28-3p;hsa-miR-98-5p;hsa-let-7g-5p;hsa-let-7i-5p
chr11	62566047-62567848	2587	NXF1	ENST00000294172	EJC+miRNA	78	72	0.193	1	hsa-miR-1301-3p
chr10	122665533-122666287	988	WDR11	ENST00000263461	EJC+miRNA	186	96	0.192	8	hsa-miR-15a-5p;hsa-miR-16-5p;hsa-miR-103a-3p;hsa-miR-107;hsa-miR-15b-5p;hsa-miR-340-5p;hsa-miR-424-5p;hsa-miR-503-5p
chr17	33469141-33469276	1506	NLE1	ENST00000442241	EJC+miRNA	59	45	0.192	15	hsa-miR-4286;hsa-miR-148a-3p;hsa-miR-152-3p;hsa-miR-148b-3p;hsa-miR-185-5p;hsa-miR-28-5p;hsa-miR-708-5p;hsa-miR-23a-3p;hsa-miR-218-5p;hsa-miR-23b-3p;hsa-miR-1260b;hsa-miR-378a-3p;hsa-miR-505-3p;hsa-miR-421;hsa-miR-1260b
chr16	70542367-70543133	2110	COG4	ENST00000323786	EJC+miRNA	90	56	0.19	1	hsa-miR-484
chr3	180680728-180680815	570	FXR1	ENST00000445140	EJC+miRNA	111	114	0.185	1	hsa-miR-769-5p
chr9	140459410-140459536	774	WDR85	ENST00000277540	EJC+miRNA	24	18	0.181	8	hsa-miR-101-3p;hsa-miR-128-3p;hsa-miR-1260b;hsa-miR-96-5p;hsa-miR-182-5p;hsa-miR-425-5p;hsa-miR-500a-3p;hsa-miR-1271-5p
chr2	128047077-128047264	1834	ERCC3	ENST00000285398	EJC+miRNA	197	87	0.181	7	hsa-miR-10a-3p;hsa-miR-10a-3p;hsa-miR-218-5p;hsa-miR-590-3p;hsa-miR-29a-3p;hsa-miR-9-5p;hsa-miR-378a-5p
chr14	73577863-73578235	783	RBM25	ENST00000261973	EJC+miRNA	457	199	0.179	2	hsa-miR-196a-5p;hsa-miR-196b-5p
chr12	123003576-123005931	3435	RSRC2	ENST00000331738	EJC+miRNA	104	75	0.178	5	hsa-miR-9-5p;hsa-miR-769-5p;hsa-miR-30e-3p;hsa-miR-660-5p;hsa-miR-629-5p
chr13	20425588-20425828	1608	ZMYM5	ENST00000337963	EJC+miRNA	67	28	0.173	4	hsa-miR-450b-5p;hsa-miR-128-3p;hsa-miR-345-5p;hsa-miR-652-3p
chr7	92122443-92123606	1908	PEX1	ENST00000248633	EJC+miRNA	77	32	0.172	10	hsa-let-7a-5p;hsa-let-7c-5p;hsa-let-7d-5p;hsa-let-7e-5p;hsa-let-7f-5p;hsa-miR-98-5p;hsa-miR-196a-5p;hsa-let-7g-5p;hsa-let-7i-5p;hsa-miR-196b-5p
chr5	140048575-140048663	533	WDR55	ENST00000358337	EJC+miRNA	101	39	0.17	10	hsa-let-7a-5p;hsa-let-7c-5p;hsa-let-7d-5p;hsa-let-7e-5p;hsa-let-7f-5p;hsa-miR-98-5p;hsa-miR-196a-5p;hsa-let-7g-5p;hsa-let-7i-5p;hsa-miR-196b-5p
chr17	27229719-27229835	1058	DHRS13	ENST00000378895	EJC+miRNA	81	33	0.169	9	hsa-miR-15a-5p;hsa-miR-16-5p;hsa-miR-103a-3p;hsa-miR-103a-3p;hsa-miR-107;hsa-miR-107;hsa-miR-15b-5p;hsa-miR-424-5p;hsa-miR-503-5p
chr12	1039052-1039216	1072	RAD52	ENST00000358495	EJC+miRNA	52	21	0.168	1	hsa-miR-3613-5p
chr1	207940540-207943665	3300	CD46	ENST00000367041	EJC+miRNA	74	51	0.166	7	hsa-miR-30a-5p;hsa-miR-30c-5p;hsa-miR-30d-5p;hsa-miR-30b-5p;hsa-miR-30e-5p;hsa-miR-374a-5p;hsa-miR-374b-5p
chr21	47666318-47666541	1537	MCM3AP	ENST00000291688	EJC+miRNA	143	56	0.164	9	hsa-miR-615-3p;hsa-miR-450b-5p;hsa-miR-27a-3p;hsa-miR-27b-3p;hsa-miR-15a-5p;hsa-miR-16-5p;hsa-miR-15b-5p;hsa-miR-424-5p;hsa-miR-503-5p
chr10	58119614-58119778	536	ZWINT	ENST00000395405	EJC+miRNA	895	351	0.164	6	hsa-miR-590-3p;hsa-miR-17-3p;hsa-miR-339-5p;hsa-miR-17-3p;hsa-miR-1301-3p;hsa-miR-3613-5p
chr17	26874427-26874694	147	UNC119	ENST00000335765	EJC+miRNA	209	81	0.162	1	hsa-miR-197-3p
chr10	58119902-58120053	839	ZWINT	ENST00000395405	EJC+miRNA	1129	443	0.162	7	hsa-miR-22-3p;hsa-miR-590-3p;hsa-miR-17-3p;hsa-miR-339-5p;hsa-miR-17-3p;hsa-miR-1301-3p;hsa-miR-3613-5p
chr7	2579522-2580612	2144	BRAT1	ENST00000340611	EJC+miRNA	98	43	0.161	7	hsa-miR-301a-5p;hsa-miR-17-3p;hsa-miR-103a-3p;hsa-miR-107;hsa-miR-128-3p;hsa-miR-1301-3p;hsa-miR-1307-3p
chr5	175956819-175957082	605	RNF44	ENST00000274811	EJC+miRNA	23	9	0.16	1	hsa-miR-92a-1-5p
chr1	153609129-153610770	2319	CHTOP	ENST00000368694	EJC+miRNA	482	197	0.16	29	hsa-miR-22-3p;hsa-miR-1307-3p;hsa-miR-1307-3p;hsa-miR-31-5p;hsa-miR-4286;hsa-miR-3909;hsa-miR-378a-3p;hsa-miR-17-5p;hsa-miR-20a-5p;hsa-miR-93-5p;hsa-miR-103a-3p;hsa-miR-107;hsa-miR-181a-5p;hsa-miR-181b-5p;hsa-miR-106b-5p;hsa-miR-181d-5p;hsa-miR-1301-3p;hsa-miR-454-3p;hsa-miR-23a-3p;hsa-miR-23b-3p;hsa-miR-532-5p;hsa-miR-17-5p;hsa-miR-20a-5p;hsa-miR-93-5p;hsa-miR-186-5p;hsa-miR-106b-5p;hsa-miR-7-5p…
chr6	43471444-43472498	1852	TJAP1	ENST00000372452	miRNA	94	38	0.16	18	hsa-miR-18a-5p;hsa-miR-378a-3p;hsa-miR-17-3p;hsa-miR-1301-3p;hsa-miR-454-3p;hsa-let-7a-5p;hsa-let-7c-5p;hsa-let-7d-5p;hsa-let-7e-5p;hsa-let-7f-5p;hsa-miR-98-5p;hsa-miR-196a-5p;hsa-let-7g-5p;hsa-let-7i-5p;hsa-miR-140-3p;hsa-miR-196b-5p;hsa-miR-19a-3p;hsa-miR-19b-3p
chr14	21463060-21463323	815	METTL17	ENST00000382985	EJC+miRNA	289	130	0.159	1	hsa-miR-484
chr8	145138403-145138616	1574	GPAA1	ENST00000355091	EJC+miRNA	246	92	0.158	14	hsa-miR-15a-5p;hsa-miR-16-5p;hsa-miR-15b-5p;hsa-miR-424-5p;hsa-miR-503-5p;hsa-miR-103a-3p;hsa-miR-107;hsa-miR-31-5p;hsa-miR-96-5p;hsa-miR-103a-3p;hsa-miR-107;hsa-miR-182-5p;hsa-miR-1271-5p;hsa-miR-7-5p
chr17	36361804-36365054	4122	RP11-1407O15.2.1	ENST00000520237	EJC+miRNA	77	29	0.158	6	hsa-miR-17-5p;hsa-miR-20a-5p;hsa-miR-93-5p;hsa-miR-106b-5p;hsa-miR-24-3p;hsa-miR-484
chr6	43487576-43487803	882	POLR1C	ENST00000372389	EJC+miRNA	297	111	0.157	12	hsa-miR-501-3p;hsa-miR-502-3p;hsa-miR-15a-5p;hsa-miR-16-5p;hsa-miR-103a-3p;hsa-miR-107;hsa-miR-192-5p;hsa-miR-15b-5p;hsa-miR-424-5p;hsa-miR-503-5p;hsa-miR-582-5p;hsa-miR-454-3p
chr14	75572699-75573204	1813	NEK9	ENST00000238616	EJC+miRNA	76	44	0.155	6	hsa-miR-10a-5p;hsa-miR-10b-5p;hsa-miR-125b-5p;hsa-miR-125a-5p;hsa-miR-769-5p;hsa-miR-1260b
chr1	9781645-9781818	1349	PIK3CD	ENST00000377346	EJC+miRNA	14	5	0.152	4	hsa-miR-27a-3p;hsa-miR-101-3p;hsa-miR-27b-3p;hsa-miR-128-3p
chr1	113242604-113242840	446	MOV10	ENST00000357443	EJC+miRNA	168	61	0.151	22	hsa-let-7a-5p;hsa-let-7c-5p;hsa-let-7d-5p;hsa-let-7e-5p;hsa-let-7f-5p;hsa-miR-98-5p;hsa-miR-196a-5p;hsa-let-7g-5p;hsa-let-7i-5p;hsa-miR-196b-5p;hsa-miR-7974;hsa-let-7a-5p;hsa-let-7c-5p;hsa-let-7d-5p;hsa-let-7e-5p;hsa-let-7f-5p;hsa-miR-98-5p;hsa-miR-196a-5p;hsa-let-7g-5p;hsa-let-7i-5p;hsa-miR-196b-5p;hsa-miR-423-5p
chr2	240951113-240954155	3399	NDUFA10	ENST00000422018	EJC+miRNA	299	115	0.15	15	hsa-miR-340-5p;hsa-miR-27a-3p;hsa-miR-101-3p;hsa-miR-27b-3p;hsa-miR-128-3p;hsa-miR-1180-3p;hsa-miR-25-3p;hsa-miR-92a-3p;hsa-miR-363-3p;hsa-miR-92b-3p;hsa-miR-17-5p;hsa-miR-20a-5p;hsa-miR-93-5p;hsa-miR-106b-5p;hsa-miR-340-5p
chr7	150774488-150774707	595	FASTK	ENST00000297532	EJC+miRNA	199	70	0.149	1	hsa-miR-941
chr12	123467085-123467166	90	ARL6IP4	ENST00000439686	miRNA	525	181	0.148	1	hsa-miR-455-3p
chr7	128116929-128117135	1229	METTL2B	ENST00000262432	EJC+miRNA	210	72	0.146	4	hsa-miR-450b-5p;hsa-miR-27a-3p;hsa-miR-7-5p;hsa-miR-27b-3p
chr3	49750089-49750945	2079	RNF123	ENST00000327697	EJC+miRNA	44	17	0.146	6	hsa-miR-455-3p;hsa-miR-3909;hsa-miR-26a-5p;hsa-miR-26b-5p;hsa-miR-30e-3p;hsa-miR-3909
chr1	153903333-153903422	406	DENND4B	ENST00000361217	EJC+miRNA	87	28	0.144	8	hsa-miR-28-5p;hsa-miR-708-5p;hsa-miR-4286;hsa-miR-15a-5p;hsa-miR-16-5p;hsa-miR-15b-5p;hsa-miR-424-5p;hsa-miR-503-5p
chr6	44197783-44198083	1140	SLC29A1	ENST00000371755	EJC+miRNA	182	61	0.144	14	hsa-miR-15a-5p;hsa-miR-15a-5p;hsa-miR-16-5p;hsa-miR-16-5p;hsa-miR-103a-3p;hsa-miR-103a-3p;hsa-miR-107;hsa-miR-107;hsa-miR-15b-5p;hsa-miR-15b-5p;hsa-miR-424-5p;hsa-miR-424-5p;hsa-miR-503-5p;hsa-miR-503-5p
chr1	16270210-16270302	944	ZBTB17	ENST00000375743	EJC+miRNA	47	16	0.143	1	hsa-miR-218-5p
chr9	35750738-35750836	929	RGP1	ENST00000378078	EJC+miRNA	51	18	0.143	4	hsa-miR-17-5p;hsa-miR-20a-5p;hsa-miR-93-5p;hsa-miR-106b-5p
chr12	57909774-57910027	489	MARS	ENST00000262027	EJC+miRNA	272	105	0.142	3	hsa-miR-149-5p;hsa-miR-194-5p;hsa-miR-3613-5p
chr5	140047919-140047999	818	WDR55	ENST00000358337	EJC+miRNA	132	38	0.142	10	hsa-let-7a-5p;hsa-let-7c-5p;hsa-let-7d-5p;hsa-let-7e-5p;hsa-let-7f-5p;hsa-miR-98-5p;hsa-miR-196a-5p;hsa-let-7g-5p;hsa-let-7i-5p;hsa-miR-196b-5p
chr6	52957622-52958263	1007	FBXO9	ENST00000370939	EJC+miRNA	203	67	0.14	1	hsa-miR-9-5p
chr22	21355076-21355544	1029	THAP7	ENST00000399133	EJC+miRNA	209	68	0.14	3	hsa-miR-1307-3p;hsa-miR-17-3p;hsa-miR-1301-3p
chr8	145736105-145736176	299	MFSD3	ENST00000301327	EJC+miRNA	257	62	0.139	2	hsa-miR-28-5p;hsa-miR-708-5p
chr8	145161367-145161457	360	MAF1	ENST00000322428	EJC+miRNA	609	190	0.139	1	hsa-miR-3613-5p
chr1	43220661-43220835	1086	LEPRE1	ENST00000296388	EJC+miRNA	102	47	0.138	2	hsa-miR-17-3p;hsa-miR-3613-5p
chr5	43161708-43161810	1140	ZNF131	ENST00000509634	EJC+miRNA	107	34	0.137	4	hsa-miR-92a-1-5p;hsa-miR-629-5p;hsa-miR-548k;hsa-miR-218-5p
chr1	154962733-154962814	440	FLAD1	ENST00000315144	EJC+miRNA	134	36	0.135	1	hsa-miR-378a-3p
chr12	121017400-121017576	329	POP5	ENST00000357500	EJC+miRNA	206	68	0.135	13	hsa-miR-221-5p;hsa-miR-148a-3p;hsa-miR-152-3p;hsa-miR-148b-3p;hsa-miR-454-3p;hsa-miR-3065-5p;hsa-miR-15a-5p;hsa-miR-16-5p;hsa-miR-27a-3p;hsa-miR-15b-5p;hsa-miR-27b-3p;hsa-miR-424-5p;hsa-miR-503-5p
chr8	145619253-145619327	370	CPSF1	ENST00000349769	EJC+miRNA	119	40	0.134	2	hsa-miR-196a-5p;hsa-miR-196b-5p
chr6	43487923-43488012	624	POLR1C	ENST00000372389	EJC+miRNA	276	81	0.133	2	hsa-miR-501-3p;hsa-miR-502-3p
chr12	125609315-125609447	912	AACS	ENST00000316519	EJC+miRNA	37	14	0.132	4	hsa-miR-7-5p;hsa-miR-339-5p;hsa-miR-486-5p;hsa-miR-17-3p
chr12	6669492-6669612	939	NOP2	ENST00000322166	EJC+miRNA	409	123	0.131	19	hsa-miR-31-5p;hsa-miR-9-5p;hsa-miR-423-5p;hsa-miR-15a-5p;hsa-miR-15a-5p;hsa-miR-16-5p;hsa-miR-16-5p;hsa-miR-103a-3p;hsa-miR-107;hsa-miR-15b-5p;hsa-miR-15b-5p;hsa-miR-149-5p;hsa-miR-130b-5p;hsa-miR-378a-3p;hsa-miR-424-5p;hsa-miR-424-5p;hsa-miR-503-5p;hsa-miR-503-5p;hsa-miR-7974
chr9	140507458-140507911	1383	ARRDC1	ENST00000371421	EJC+miRNA	36	16	0.131	3	hsa-miR-18a-5p;hsa-miR-7-5p;hsa-miR-15b-3p
chr5	177570728-177570942	865	RMND5B	ENST00000313386	EJC+miRNA	178	53	0.13	1	hsa-miR-454-3p
chr20	35399596-35399827	1185	DSN1	ENST00000373750	EJC+miRNA	77	35	0.13	8	hsa-miR-17-5p;hsa-miR-19a-3p;hsa-miR-19b-3p;hsa-miR-20a-5p;hsa-miR-93-5p;hsa-miR-106b-5p;hsa-miR-548k;hsa-miR-874-3p
chr5	176562201-176562941	7847	NSD1	ENST00000354179	EJC+miRNA	158	47	0.127	59	hsa-miR-196a-5p;hsa-miR-196b-5p;hsa-miR-454-3p;hsa-miR-15a-5p;hsa-miR-16-5p;hsa-miR-15b-5p;hsa-miR-424-5p;hsa-miR-503-5p;hsa-miR-629-5p;hsa-miR-29a-3p;hsa-miR-103a-3p;hsa-miR-107;hsa-miR-196a-5p;hsa-miR-301a-5p;hsa-miR-196b-5p;hsa-miR-92a-1-5p;hsa-miR-3613-5p;hsa-miR-9-5p;hsa-miR-615-3p;hsa-miR-15a-5p;hsa-miR-16-5p;hsa-miR-103a-3p;hsa-miR-107;hsa-miR-15b-5p;hsa-miR-424-5p;hsa-miR-503-5p;hsa-miR-1…
chr1	46871466-46871709	1194	FAAH	ENST00000243167	EJC+miRNA	2	1	0.124	1	hsa-miR-455-3p
chr8	145651155-145651408	578	VPS28	ENST00000292510	EJC+miRNA	115	33	0.124	4	hsa-miR-149-5p;hsa-miR-340-3p;hsa-miR-17-3p;hsa-miR-1301-3p
chr6	31500688-31503143	2869	DDX39B	ENST00000415382	EJC+miRNA	1724	490	0.124	27	hsa-miR-221-5p;hsa-miR-1180-3p;hsa-miR-218-5p;hsa-miR-191-5p;hsa-miR-7-5p;hsa-miR-548k;hsa-miR-140-5p;hsa-miR-361-5p;hsa-miR-365b-3p;hsa-miR-17-5p;hsa-miR-20a-5p;hsa-miR-93-5p;hsa-miR-106b-5p;hsa-miR-185-5p;hsa-miR-28-5p;hsa-miR-186-5p;hsa-miR-708-5p;hsa-miR-148a-5p;hsa-miR-500a-3p;hsa-miR-501-3p;hsa-miR-502-3p;hsa-miR-92a-1-5p;hsa-miR-532-5p;hsa-miR-1307-3p;hsa-miR-196a-5p;hsa-miR-196b-5p;hsa-mi…
chr7	150774867-150774965	676	FASTK	ENST00000297532	EJC+miRNA	215	60	0.122	1	hsa-miR-941
chr10	121336262-121336591	542	TIAL1	ENST00000436547	EJC+miRNA	662	179	0.119	21	hsa-miR-505-3p;hsa-miR-660-5p;hsa-miR-362-5p;hsa-miR-15a-5p;hsa-miR-16-5p;hsa-miR-18a-5p;hsa-miR-29a-3p;hsa-miR-103a-3p;hsa-miR-107;hsa-miR-15b-5p;hsa-miR-424-5p;hsa-miR-503-5p;hsa-miR-660-5p;hsa-let-7a-5p;hsa-let-7c-5p;hsa-let-7d-5p;hsa-let-7e-5p;hsa-let-7f-5p;hsa-miR-98-5p;hsa-let-7g-5p;hsa-let-7i-5p
chr8	25317816-25317899	3086	CDCA2	ENST00000330560	EJC+miRNA	64	19	0.118	31	hsa-miR-450b-5p;hsa-miR-149-5p;hsa-miR-629-5p;hsa-miR-362-5p;hsa-miR-18a-5p;hsa-miR-423-3p;hsa-miR-423-3p;hsa-miR-450b-5p;hsa-miR-484;hsa-miR-320a;hsa-miR-345-5p;hsa-miR-148a-3p;hsa-miR-152-3p;hsa-miR-148b-3p;hsa-miR-582-5p;hsa-miR-454-3p;hsa-miR-196a-5p;hsa-miR-196b-5p;hsa-let-7a-5p;hsa-let-7c-5p;hsa-let-7d-5p;hsa-let-7e-5p;hsa-let-7f-5p;hsa-miR-18a-5p;hsa-miR-19a-3p;hsa-miR-19b-3p;hsa-miR-98-5p…
chr12	122967891-122968006	1420	ZCCHC8	ENST00000336229	EJC+miRNA	67	22	0.118	15	hsa-miR-19a-3p;hsa-miR-19b-3p;hsa-miR-454-3p;hsa-miR-590-3p;hsa-let-7a-5p;hsa-let-7c-5p;hsa-let-7d-5p;hsa-let-7e-5p;hsa-let-7f-5p;hsa-miR-98-5p;hsa-let-7g-5p;hsa-let-7i-5p;hsa-miR-18a-5p;hsa-miR-590-3p;hsa-miR-1296-5p
chr2	38975795-38976670	1163	SRSF7	ENST00000409276	EJC+miRNA	1390	420	0.118	2	hsa-miR-192-5p;hsa-miR-378a-3p
chr3	42661200-42662920	5819	NKTR	ENST00000232978	EJC+miRNA	55	26	0.116	8	hsa-miR-18a-5p;hsa-miR-148a-5p;hsa-miR-130b-5p;hsa-miR-26a-5p;hsa-miR-26b-5p;hsa-miR-19a-3p;hsa-miR-19b-3p;hsa-miR-454-3p
chr1	6653718-6655544	2000	KLHL21	ENST00000377658	miRNA	73	22	0.116	3	hsa-miR-19a-3p;hsa-miR-19b-3p;hsa-miR-454-3p
chr5	10400954-10402170	2902	MARCH6	ENST00000274140	EJC+miRNA	107	44	0.115	14	hsa-miR-22-3p;hsa-miR-450a-5p;hsa-miR-1180-3p;hsa-miR-22-3p;hsa-miR-7-5p;hsa-miR-130b-5p;hsa-miR-769-5p;hsa-miR-548k;hsa-miR-7-5p;hsa-miR-96-5p;hsa-miR-182-5p;hsa-miR-486-5p;hsa-miR-1271-5p;hsa-miR-548k
chr3	49743112-49743414	1772	RNF123	ENST00000327697	EJC+miRNA	58	16	0.115	6	hsa-miR-455-3p;hsa-miR-3909;hsa-miR-26a-5p;hsa-miR-26b-5p;hsa-miR-30e-3p;hsa-miR-3909
chr12	123465846-123466141	822	ARL6IP4	ENST00000439686	EJC+miRNA	393	101	0.114	14	hsa-miR-455-3p;hsa-miR-1180-3p;hsa-miR-28-5p;hsa-miR-708-5p;hsa-let-7a-5p;hsa-let-7c-5p;hsa-let-7d-5p;hsa-let-7e-5p;hsa-let-7f-5p;hsa-miR-98-5p;hsa-miR-7-5p;hsa-let-7g-5p;hsa-let-7i-5p;hsa-miR-423-5p
chr14	21461350-21462127	1573	METTL17	ENST00000382985	EJC+miRNA	233	68	0.113	1	hsa-miR-484
chr6	30313005-30313074	946	RPP21	ENST00000442966	EJC+miRNA	371	76	0.113	6	hsa-miR-31-5p;hsa-miR-96-5p;hsa-miR-182-5p;hsa-miR-140-5p;hsa-miR-1271-5p;hsa-miR-3613-5p
chr6	30313005-30313074	946	TRIM39-RPP21	ENST00000513556	EJC+miRNA	371	76	0.113	6	hsa-miR-31-5p;hsa-miR-96-5p;hsa-miR-182-5p;hsa-miR-140-5p;hsa-miR-1271-5p;hsa-miR-3613-5p
chr1	161089178-161089298	669	NIT1	ENST00000368009	EJC+miRNA	103	26	0.112	1	hsa-miR-320a
chr3	49070206-49070552	742	QRICH1	ENST00000395443	EJC+miRNA	260	65	0.111	12	hsa-miR-1301-3p;hsa-let-7a-5p;hsa-let-7c-5p;hsa-let-7d-5p;hsa-let-7e-5p;hsa-let-7f-5p;hsa-miR-98-5p;hsa-miR-196a-5p;hsa-let-7g-5p;hsa-let-7i-5p;hsa-miR-196b-5p;hsa-miR-454-3p
chr1	202302221-202302364	284	UBE2T	ENST00000367274	EJC+miRNA	422	110	0.11	7	hsa-miR-17-3p;hsa-miR-22-3p;hsa-miR-140-5p;hsa-miR-1301-3p;hsa-miR-149-5p;hsa-miR-374a-3p;hsa-miR-532-5p
chr6	131913600-131914145	1211	MED23	ENST00000368068	EJC+miRNA	67	19	0.11	2	hsa-miR-27a-3p;hsa-miR-27b-3p
chr11	63713407-63714422	1357	NAA40	ENST00000377793	EJC+miRNA	97	34	0.109	3	hsa-miR-28-5p;hsa-miR-708-5p;hsa-miR-4286
chr8	144696623-144696793	259	TSTA3	ENST00000425753	EJC+miRNA	194	54	0.109	2	hsa-miR-185-5p;hsa-miR-769-5p
chr5	131714173-131719838	6838	SLC22A5	ENST00000245407	EJC+miRNA	33	8	0.108	29	hsa-miR-15a-5p;hsa-miR-15a-5p;hsa-miR-16-5p;hsa-miR-16-5p;hsa-miR-25-3p;hsa-miR-92a-3p;hsa-miR-103a-3p;hsa-miR-103a-3p;hsa-miR-107;hsa-miR-107;hsa-miR-15b-5p;hsa-miR-15b-5p;hsa-miR-363-3p;hsa-miR-424-5p;hsa-miR-424-5p;hsa-miR-503-5p;hsa-miR-503-5p;hsa-miR-92b-3p;hsa-miR-1301-3p;hsa-let-7a-5p;hsa-let-7c-5p;hsa-let-7d-5p;hsa-let-7e-5p;hsa-let-7f-5p;hsa-miR-98-5p;hsa-miR-196a-5p;hsa-let-7g-5p;hsa-le…
chr16	3651192-3652118	5309	SLX4	ENST00000294008	EJC+miRNA	29	7	0.108	3	hsa-miR-18a-5p;hsa-miR-140-5p;hsa-miR-582-5p
chr20	57568819-57569164	444	TH1L	ENST00000344018	EJC+miRNA	354	85	0.107	1	hsa-miR-197-3p
chr11	581606-581961	5188	PHRF1	ENST00000264555	EJC+miRNA	42	10	0.106	7	hsa-miR-218-5p;hsa-miR-1307-5p;hsa-miR-3909;hsa-miR-7974;hsa-miR-340-3p;hsa-miR-500a-3p;hsa-miR-4286
chr1	113241100-113241336	682	MOV10	ENST00000357443	EJC+miRNA	194	52	0.106	22	hsa-let-7a-5p;hsa-let-7c-5p;hsa-let-7d-5p;hsa-let-7e-5p;hsa-let-7f-5p;hsa-miR-98-5p;hsa-miR-196a-5p;hsa-let-7g-5p;hsa-let-7i-5p;hsa-miR-196b-5p;hsa-miR-7974;hsa-let-7a-5p;hsa-let-7c-5p;hsa-let-7d-5p;hsa-let-7e-5p;hsa-let-7f-5p;hsa-miR-98-5p;hsa-miR-196a-5p;hsa-let-7g-5p;hsa-let-7i-5p;hsa-miR-196b-5p;hsa-miR-423-5p
chrX	153678083-153678230	384	FAM50A	ENST00000393600	EJC+miRNA	3	8	0.106	3	hsa-miR-29a-3p;hsa-miR-218-5p;hsa-miR-126-3p
chr19	38708231-38708437	599	DPF1	ENST00000437720	EJC+miRNA	27	7	0.106	4	hsa-miR-27a-3p;hsa-miR-27b-3p;hsa-miR-128-3p;hsa-miR-340-3p
chr1	151379107-151379386	1944	POGZ	ENST00000271715	EJC+miRNA	31	21	0.105	21	hsa-miR-24-3p;hsa-miR-27a-3p;hsa-miR-27b-3p;hsa-miR-128-3p;hsa-miR-484;hsa-miR-320a;hsa-miR-874-3p;hsa-miR-186-5p;hsa-miR-3613-5p;hsa-miR-484;hsa-miR-140-3p;hsa-miR-221-3p;hsa-miR-222-3p;hsa-miR-590-3p;hsa-miR-23a-3p;hsa-miR-15b-3p;hsa-miR-23b-3p;hsa-miR-615-3p;hsa-miR-378a-3p;hsa-miR-425-5p;hsa-miR-455-3p
chr10	24884972-24885668	3045	ARHGAP21	ENST00000396432	EJC+miRNA	98	23	0.105	8	hsa-miR-103a-3p;hsa-miR-107;hsa-miR-1301-3p;hsa-miR-3613-5p;hsa-miR-96-5p;hsa-miR-182-5p;hsa-miR-149-5p;hsa-miR-1271-5p
chr12	7025893-7026201	1346	ENO2	ENST00000229277	EJC+miRNA	91	42	0.104	1	hsa-miR-7974
chr2	27456404-27456493	3512	CAD	ENST00000264705	EJC+miRNA	179	39	0.103	6	hsa-miR-103a-3p;hsa-miR-107;hsa-miR-1301-3p;hsa-miR-454-3p;hsa-miR-197-3p;hsa-miR-21-5p
chr3	32611911-32612116	1348	DYNC1LI1	ENST00000273130	EJC+miRNA	76	20	0.103	8	hsa-miR-365b-3p;hsa-miR-30a-5p;hsa-miR-30c-5p;hsa-miR-30d-5p;hsa-miR-30b-5p;hsa-miR-30e-5p;hsa-miR-1180-3p;hsa-miR-500a-3p
chr14	24707611-24707794	372	GMPR2	ENST00000399440	miRNA	326	75	0.103	2	hsa-miR-196a-5p;hsa-miR-196b-5p
chr2	136511137-136511728	1830	UBXN4	ENST00000272638	EJC+miRNA	74	41	0.101	4	hsa-miR-31-5p;hsa-miR-183-5p;hsa-miR-9-3p;hsa-miR-3065-5p
chr2	74756062-74756258	981	AUP1	ENST00000377526	EJC+miRNA	525	118	0.101	17	hsa-miR-320a;hsa-miR-15a-5p;hsa-miR-16-5p;hsa-miR-103a-3p;hsa-miR-107;hsa-miR-15b-5p;hsa-miR-424-5p;hsa-miR-503-5p;hsa-miR-17-5p;hsa-miR-20a-5p;hsa-miR-93-5p;hsa-miR-140-3p;hsa-miR-106b-5p;hsa-miR-345-5p;hsa-miR-186-5p;hsa-miR-320a;hsa-miR-7974
chr11	64880337-64880691	1299	TM7SF2	ENST00000279263	EJC+miRNA	61	19	0.1	12	hsa-let-7a-5p;hsa-let-7c-5p;hsa-let-7d-5p;hsa-let-7e-5p;hsa-let-7f-5p;hsa-miR-98-5p;hsa-miR-196a-5p;hsa-let-7g-5p;hsa-let-7i-5p;hsa-miR-196b-5p;hsa-miR-27a-3p;hsa-miR-27b-3p
chr14	95916442-95918583	3701	C14orf49	ENST00000334258	EJC+miRNA	9	2	0.1	2	hsa-miR-125b-5p;hsa-miR-125a-5p
chr6	33248299-33248450	528	WDR46	ENST00000374617	EJC+miRNA	144	32	0.1	2	hsa-miR-425-5p;hsa-miR-1307-3p
chr4	2933663-2933771	747	MFSD10	ENST00000514800	EJC+miRNA	202	45	0.1	14	hsa-let-7a-5p;hsa-let-7c-5p;hsa-let-7d-5p;hsa-let-7e-5p;hsa-let-7f-5p;hsa-miR-98-5p;hsa-miR-196a-5p;hsa-miR-7-5p;hsa-let-7g-5p;hsa-let-7i-5p;hsa-miR-151a-3p;hsa-miR-196b-5p;hsa-miR-103a-3p;hsa-miR-107
chr19	10668358-10668444	683	KRI1	ENST00000312962	EJC+miRNA	179	36	0.099	1	hsa-miR-29a-3p
chr8	145140382-145140475	504	GPAA1	ENST00000355091	EJC+miRNA	264	58	0.099	13	hsa-miR-15a-5p;hsa-miR-16-5p;hsa-miR-15b-5p;hsa-miR-424-5p;hsa-miR-503-5p;hsa-miR-103a-3p;hsa-miR-107;hsa-miR-31-5p;hsa-miR-96-5p;hsa-miR-103a-3p;hsa-miR-107;hsa-miR-182-5p;hsa-miR-1271-5p
chr7	100283702-100283802	2259	GIGYF1	ENST00000539430	EJC+miRNA	240	53	0.099	20	hsa-miR-17-3p;hsa-miR-130b-5p;hsa-miR-548k;hsa-miR-10a-5p;hsa-miR-10b-5p;hsa-miR-125b-5p;hsa-miR-125a-5p;hsa-miR-191-5p;hsa-miR-374a-5p;hsa-miR-374b-5p;hsa-miR-149-5p;hsa-miR-149-5p;hsa-miR-17-3p;hsa-miR-92a-1-5p;hsa-miR-148a-3p;hsa-miR-152-3p;hsa-miR-340-3p;hsa-miR-148b-3p;hsa-miR-1301-3p;hsa-miR-874-3p
chr1	24120815-24120916	254	LYPLA2	ENST00000374514	EJC+miRNA	193	42	0.098	2	hsa-miR-425-5p;hsa-miR-941
chr8	82626274-82627038	1201	ZFAND1	ENST00000220669	EJC+miRNA	225	48	0.096	1	hsa-miR-548k
chr11	375773-375846	1909	B4GALNT4	ENST00000329962	EJC+miRNA	43	7	0.096	2	hsa-miR-140-5p;hsa-miR-140-5p
chr7	150731515-150731591	616	ABCB8	ENST00000477092	EJC+miRNA	129	22	0.096	2	hsa-miR-24-3p;hsa-miR-197-3p
chr19	49458856-49458943	576	BAX	ENST00000345358	EJC+miRNA	159	44	0.095	1	hsa-miR-548k
chr6	32944713-32945218	1660	BRD2	ENST00000449085	EJC+miRNA	1625	328	0.092	47	hsa-miR-28-5p;hsa-miR-7-5p;hsa-miR-151a-5p;hsa-miR-151b;hsa-miR-708-5p;hsa-miR-221-5p;hsa-miR-149-5p;hsa-miR-501-3p;hsa-miR-502-3p;hsa-miR-1307-3p;hsa-miR-15b-3p;hsa-miR-301a-5p;hsa-miR-486-5p;hsa-miR-15a-5p;hsa-miR-16-5p;hsa-miR-103a-3p;hsa-miR-107;hsa-miR-15b-5p;hsa-miR-424-5p;hsa-miR-503-5p;hsa-miR-423-3p;hsa-miR-874-3p;hsa-miR-1307-3p;hsa-miR-15a-5p;hsa-miR-16-5p;hsa-miR-10a-5p;hsa-miR-10b-5p…
chr3	5021716-5021985	1013	BHLHE40	ENST00000256495	EJC+miRNA	97	23	0.091	3	hsa-miR-31-5p;hsa-miR-23a-3p;hsa-miR-23b-3p
chr1	44466539-44466627	484	SLC6A9	ENST00000372310	EJC+miRNA	16	3	0.091	3	hsa-miR-140-5p;hsa-miR-3613-5p;hsa-miR-218-5p
chr3	9516266-9516751	1100	SETD5	ENST00000407969	EJC+miRNA	180	37	0.091	21	hsa-miR-10a-5p;hsa-miR-10b-5p;hsa-miR-15a-5p;hsa-miR-16-5p;hsa-miR-17-3p;hsa-miR-28-3p;hsa-miR-103a-3p;hsa-miR-107;hsa-miR-15b-5p;hsa-miR-424-5p;hsa-miR-503-5p;hsa-miR-1296-5p;hsa-miR-7-5p;hsa-miR-301a-5p;hsa-miR-3909;hsa-miR-21-5p;hsa-miR-30a-5p;hsa-miR-30c-5p;hsa-miR-30d-5p;hsa-miR-30b-5p;hsa-miR-30e-5p
chr22	41980062-41980284	474	PMM1	ENST00000216259	EJC+miRNA	110	22	0.09	1	hsa-miR-186-5p
chr14	76639968-76642965	3390	C14orf118	ENST00000261530	EJC+miRNA	29	8	0.09	10	hsa-miR-17-5p;hsa-miR-20a-5p;hsa-miR-93-5p;hsa-miR-106b-5p;hsa-miR-455-3p;hsa-miR-17-5p;hsa-miR-20a-5p;hsa-miR-93-5p;hsa-miR-106b-5p;hsa-miR-18a-5p
chr17	27074965-27075034	1170	TRAF4	ENST00000262395	EJC+miRNA	239	34	0.09	15	hsa-miR-15a-5p;hsa-miR-16-5p;hsa-miR-103a-3p;hsa-miR-107;hsa-miR-15b-5p;hsa-miR-424-5p;hsa-miR-503-5p;hsa-miR-421;hsa-miR-1180-3p;hsa-miR-24-3p;hsa-miR-197-3p;hsa-miR-454-3p;hsa-miR-24-3p;hsa-miR-196a-5p;hsa-miR-196b-5p
chrX	48339916-48340019	362	FTSJ1	ENST00000348411	EJC+miRNA	143	30	0.09	2	hsa-miR-95-3p;hsa-miR-7974
chr14	23239487-23239669	692	OXA1L	ENST00000285848	EJC+miRNA	490	99	0.088	5	hsa-miR-221-5p;hsa-miR-149-5p;hsa-miR-31-5p;hsa-miR-450b-5p;hsa-miR-140-5p
chr1	113241411-113242306	1320	MOV10	ENST00000357443	EJC+miRNA	232	45	0.088	22	hsa-let-7a-5p;hsa-let-7c-5p;hsa-let-7d-5p;hsa-let-7e-5p;hsa-let-7f-5p;hsa-miR-98-5p;hsa-miR-196a-5p;hsa-let-7g-5p;hsa-let-7i-5p;hsa-miR-196b-5p;hsa-miR-7974;hsa-let-7a-5p;hsa-let-7c-5p;hsa-let-7d-5p;hsa-let-7e-5p;hsa-let-7f-5p;hsa-miR-98-5p;hsa-miR-196a-5p;hsa-let-7g-5p;hsa-let-7i-5p;hsa-miR-196b-5p;hsa-miR-423-5p
chr3	9965704-9965915	1525	IL17RC	ENST00000383812	EJC+miRNA	12	3	0.087	3	hsa-miR-17-3p;hsa-miR-22-3p;hsa-miR-874-3p
chr6	30313175-30313267	790	RPP21	ENST00000442966	EJC+miRNA	189	38	0.087	6	hsa-miR-31-5p;hsa-miR-96-5p;hsa-miR-182-5p;hsa-miR-140-5p;hsa-miR-1271-5p;hsa-miR-3613-5p
chr3	52511658-52512112	3880	NISCH	ENST00000479054	EJC+miRNA	123	28	0.087	13	hsa-miR-15a-5p;hsa-miR-16-5p;hsa-miR-103a-3p;hsa-miR-107;hsa-miR-15b-5p;hsa-miR-185-5p;hsa-miR-424-5p;hsa-miR-503-5p;hsa-miR-548k;hsa-miR-185-5p;hsa-miR-501-3p;hsa-miR-502-3p;hsa-miR-3613-5p
chr6	30313175-30313267	790	TRIM39-RPP21	ENST00000513556	EJC+miRNA	189	38	0.087	6	hsa-miR-31-5p;hsa-miR-96-5p;hsa-miR-182-5p;hsa-miR-140-5p;hsa-miR-1271-5p;hsa-miR-3613-5p
chr8	145650434-145651065	980	VPS28	ENST00000292510	EJC+miRNA	391	75	0.086	4	hsa-miR-149-5p;hsa-miR-340-3p;hsa-miR-17-3p;hsa-miR-1301-3p
chr8	38285611-38285869	2202	FGFR1	ENST00000326324	EJC+miRNA	66	13	0.085	11	hsa-miR-28-5p;hsa-miR-29a-3p;hsa-miR-708-5p;hsa-miR-1260b;hsa-miR-18a-5p;hsa-miR-22-3p;hsa-miR-24-3p;hsa-miR-31-5p;hsa-miR-96-5p;hsa-miR-182-5p;hsa-miR-1271-5p
chr1	1635063-1635262	496	CDK11A	ENST00000356200	EJC+miRNA	91	17	0.085	2	hsa-miR-3613-5p;hsa-miR-3909
chr2	201721708-201722440	1161	CLK1	ENST00000321356	EJC+miRNA	185	34	0.084	6	hsa-miR-18a-5p;hsa-miR-30a-5p;hsa-miR-30c-5p;hsa-miR-30d-5p;hsa-miR-30b-5p;hsa-miR-30e-5p
chr2	27356205-27356399	1076	PREB	ENST00000260643	EJC+miRNA	275	49	0.082	26	hsa-miR-450b-5p;hsa-let-7a-5p;hsa-let-7c-5p;hsa-let-7d-5p;hsa-let-7e-5p;hsa-let-7f-5p;hsa-miR-31-5p;hsa-miR-98-5p;hsa-miR-196a-5p;hsa-let-7g-5p;hsa-let-7i-5p;hsa-miR-196b-5p;hsa-miR-423-5p;hsa-miR-484;hsa-miR-7974;hsa-miR-185-5p;hsa-miR-320a;hsa-miR-196a-5p;hsa-miR-196b-5p;hsa-miR-15a-5p;hsa-miR-16-5p;hsa-miR-103a-3p;hsa-miR-107;hsa-miR-15b-5p;hsa-miR-424-5p;hsa-miR-503-5p
chr12	122620213-122622015	2483	MLXIP	ENST00000319080	EJC+miRNA	56	10	0.082	4	hsa-miR-125b-5p;hsa-miR-125a-5p;hsa-miR-1301-3p;hsa-miR-454-3p
chr20	62572396-62572462	690	UCKL1	ENST00000354216	EJC+miRNA	49	6	0.082	1	hsa-miR-548k
chr16	68266590-68266663	1480	ESRP2	ENST00000473183	EJC+miRNA	46	8	0.082	3	hsa-miR-196a-5p;hsa-miR-196b-5p;hsa-miR-7974
chr3	52724720-52724960	1161	GNL3	ENST00000418458	EJC+miRNA	1185	207	0.08	10	hsa-miR-183-5p;hsa-miR-101-3p;hsa-miR-183-5p;hsa-miR-15a-5p;hsa-miR-16-5p;hsa-miR-103a-3p;hsa-miR-107;hsa-miR-15b-5p;hsa-miR-424-5p;hsa-miR-503-5p
chr9	133573014-133573548	1065	EXOSC2	ENST00000372358	EJC+miRNA	135	39	0.079	2	hsa-miR-301a-5p;hsa-miR-218-5p
chr2	182781154-182783324	3157	SSFA2	ENST00000431877	EJC+miRNA	96	18	0.078	12	hsa-miR-28-5p;hsa-miR-708-5p;hsa-let-7a-5p;hsa-let-7c-5p;hsa-let-7d-5p;hsa-let-7e-5p;hsa-let-7f-5p;hsa-miR-98-5p;hsa-miR-196a-5p;hsa-let-7g-5p;hsa-let-7i-5p;hsa-miR-196b-5p
chr12	64818962-64819117	1523	XPOT	ENST00000332707	EJC+miRNA	492	82	0.077	4	hsa-miR-218-5p;hsa-miR-340-5p;hsa-miR-7-5p;hsa-miR-191-5p
chr19	17449835-17449931	909	GTPBP3	ENST00000324894	EJC+miRNA	215	41	0.076	1	hsa-miR-7-5p
chr13	37577144-37578652	2123	EXOSC8	ENST00000389704	EJC+miRNA	127	55	0.076	6	hsa-miR-27a-3p;hsa-miR-101-3p;hsa-miR-181a-3p;hsa-miR-27b-3p;hsa-miR-128-3p;hsa-miR-186-5p
chr5	141009483-141009610	1043	HDAC3	ENST00000305264	EJC+miRNA	133	34	0.074	12	hsa-let-7a-5p;hsa-let-7c-5p;hsa-let-7d-5p;hsa-let-7e-5p;hsa-let-7f-5p;hsa-miR-98-5p;hsa-miR-196a-5p;hsa-let-7g-5p;hsa-let-7i-5p;hsa-miR-320a;hsa-miR-196b-5p;hsa-miR-7-5p
chr11	9164392-9164949	995	DENND5A	ENST00000328194	EJC+miRNA	124	21	0.074	7	hsa-miR-25-3p;hsa-miR-92a-3p;hsa-miR-148a-5p;hsa-miR-363-3p;hsa-miR-92b-3p;hsa-miR-1180-3p;hsa-miR-1180-3p
chr6	30709110-30709390	1179	FLOT1	ENST00000376389	EJC+miRNA	264	43	0.074	19	hsa-miR-192-5p;hsa-miR-1307-3p;hsa-miR-183-5p;hsa-miR-423-3p;hsa-miR-423-3p;hsa-miR-1307-3p;hsa-miR-4286;hsa-miR-15a-5p;hsa-miR-15a-5p;hsa-miR-16-5p;hsa-miR-16-5p;hsa-miR-103a-3p;hsa-miR-107;hsa-miR-15b-5p;hsa-miR-15b-5p;hsa-miR-424-5p;hsa-miR-424-5p;hsa-miR-503-5p;hsa-miR-503-5p
chr8	144695773-144695920	345	TSTA3	ENST00000425753	EJC+miRNA	141	32	0.074	1	hsa-miR-769-5p
chr21	28212380-28212594	1405	ADAMTS1	ENST00000284984	EJC+miRNA	259	41	0.073	12	hsa-miR-22-3p;hsa-miR-31-5p;hsa-miR-183-5p;hsa-miR-320a;hsa-miR-17-5p;hsa-miR-18a-5p;hsa-miR-20a-5p;hsa-miR-93-5p;hsa-miR-197-3p;hsa-miR-106b-5p;hsa-miR-27a-3p;hsa-miR-27b-3p
chr22	51009721-51009803	568	CPT1B	ENST00000312108	EJC+miRNA	95	13	0.073	2	hsa-miR-146b-5p;hsa-miR-589-5p
chr1	45478887-45478963	715	UROD	ENST00000246337	EJC+miRNA	320	55	0.072	11	hsa-miR-92a-1-5p;hsa-miR-197-3p;hsa-miR-340-3p;hsa-miR-874-3p;hsa-miR-4286;hsa-miR-19a-3p;hsa-miR-19b-3p;hsa-miR-148a-3p;hsa-miR-152-3p;hsa-miR-148b-3p;hsa-miR-454-3p
chr11	62444111-62444284	206	UBXN1	ENST00000301935	EJC+miRNA	402	62	0.072	3	hsa-miR-10a-3p;hsa-miR-221-5p;hsa-miR-500a-3p
chr12	57140638-57140709	914	PRIM1	ENST00000338193	EJC+miRNA	223	28	0.072	3	hsa-miR-27a-3p;hsa-miR-27b-3p;hsa-miR-3065-5p
chr20	34214303-34214488	275	CPNE1	ENST00000397443	miRNA	279	43	0.072	1	hsa-miR-769-5p
chr1	153949251-153949451	272	JTB	ENST00000271843	EJC+miRNA	210	82	0.071	1	hsa-miR-22-3p
chr2	85769496-85769687	575	MAT2A	ENST00000306434	EJC+miRNA	1109	168	0.07	28	hsa-miR-17-3p;hsa-miR-455-3p;hsa-miR-3909;hsa-let-7a-5p;hsa-let-7c-5p;hsa-let-7d-5p;hsa-let-7e-5p;hsa-let-7f-5p;hsa-miR-98-5p;hsa-let-7g-5p;hsa-let-7i-5p;hsa-miR-15a-5p;hsa-miR-15a-5p;hsa-miR-16-5p;hsa-miR-16-5p;hsa-miR-103a-3p;hsa-miR-107;hsa-miR-15b-5p;hsa-miR-15b-5p;hsa-miR-362-5p;hsa-miR-374a-5p;hsa-miR-378a-5p;hsa-miR-424-5p;hsa-miR-424-5p;hsa-miR-503-5p;hsa-miR-503-5p;hsa-miR-374b-5p;hsa-mi…
chr2	71295842-71297631	2658	NAGK	ENST00000443938	EJC+miRNA	57	12	0.07	2	hsa-miR-196a-5p;hsa-miR-196b-5p
chr8	103269945-103271212	1534	UBR5	ENST00000520539	EJC+miRNA	166	26	0.07	2	hsa-miR-194-5p;hsa-miR-652-3p
chr12	121756227-121756303	403	ANAPC5	ENST00000261819	EJC+miRNA	668	79	0.069	5	hsa-miR-30a-5p;hsa-miR-30c-5p;hsa-miR-30d-5p;hsa-miR-30b-5p;hsa-miR-30e-5p
chr16	31045646-31045782	790	STX4	ENST00000313843	EJC+miRNA	210	35	0.069	5	hsa-miR-17-5p;hsa-miR-20a-5p;hsa-miR-93-5p;hsa-miR-106b-5p;hsa-miR-1301-3p
chr1	12409030-12409220	4126	VPS13D	ENST00000356315	EJC+miRNA	47	7	0.069	10	hsa-miR-140-5p;hsa-miR-9-5p;hsa-miR-15a-5p;hsa-miR-16-5p;hsa-miR-103a-3p;hsa-miR-107;hsa-miR-15b-5p;hsa-miR-424-5p;hsa-miR-503-5p;hsa-miR-590-3p
chr5	179043219-179043869	734	HNRNPH1	ENST00000393432	EJC+miRNA	1417	210	0.069	5	hsa-miR-22-3p;hsa-miR-149-5p;hsa-miR-149-5p;hsa-miR-378a-3p;hsa-miR-4286
chr7	91864960-91865726	1951	KRIT1	ENST00000415227	EJC+miRNA	115	17	0.069	8	hsa-miR-17-5p;hsa-miR-20a-5p;hsa-miR-93-5p;hsa-miR-9-3p;hsa-miR-320a;hsa-miR-106b-5p;hsa-miR-146b-5p;hsa-miR-589-5p
chr7	2582957-2583223	1690	BRAT1	ENST00000340611	EJC+miRNA	138	20	0.068	7	hsa-miR-301a-5p;hsa-miR-17-3p;hsa-miR-103a-3p;hsa-miR-107;hsa-miR-128-3p;hsa-miR-1301-3p;hsa-miR-1307-3p
chr17	40970895-40971565	1723	BECN1	ENST00000361523	EJC+miRNA	126	24	0.068	15	hsa-miR-15a-5p;hsa-miR-15a-5p;hsa-miR-16-5p;hsa-miR-16-5p;hsa-miR-103a-3p;hsa-miR-103a-3p;hsa-miR-107;hsa-miR-107;hsa-miR-15b-5p;hsa-miR-15b-5p;hsa-miR-128-3p;hsa-miR-424-5p;hsa-miR-424-5p;hsa-miR-503-5p;hsa-miR-503-5p
chr1	3807621-3809446	2290	C1orf174	ENST00000361605	EJC+miRNA	234	34	0.068	9	hsa-miR-96-5p;hsa-miR-182-5p;hsa-miR-186-5p;hsa-miR-1271-5p;hsa-miR-17-3p;hsa-miR-7-5p;hsa-miR-1301-3p;hsa-miR-941;hsa-miR-301a-5p
chr6	43405751-43406361	3080	ABCC10	ENST00000372530	EJC+miRNA	19	3	0.068	14	hsa-miR-29a-3p;hsa-miR-29a-3p;hsa-miR-941;hsa-let-7a-5p;hsa-let-7c-5p;hsa-let-7d-5p;hsa-let-7e-5p;hsa-let-7f-5p;hsa-miR-98-5p;hsa-miR-196a-5p;hsa-let-7g-5p;hsa-let-7i-5p;hsa-miR-191-5p;hsa-miR-196b-5p
chr12	121783834-121784698	2731	ANAPC5	ENST00000261819	EJC+miRNA	579	82	0.066	15	hsa-miR-361-5p;hsa-miR-421;hsa-miR-3065-5p;hsa-miR-27a-3p;hsa-miR-27b-3p;hsa-miR-484;hsa-miR-7974;hsa-miR-194-5p;hsa-miR-486-5p;hsa-miR-7-5p;hsa-miR-30a-5p;hsa-miR-30c-5p;hsa-miR-30d-5p;hsa-miR-30b-5p;hsa-miR-30e-5p
chr8	145649651-145650100	620	VPS28	ENST00000292510	EJC+miRNA	151	30	0.066	4	hsa-miR-149-5p;hsa-miR-340-3p;hsa-miR-17-3p;hsa-miR-1301-3p
chr5	177569729-177569852	1016	RMND5B	ENST00000313386	EJC+miRNA	242	34	0.066	1	hsa-miR-454-3p
chr11	67378041-67378465	1038	NDUFV1	ENST00000322776	EJC+miRNA	527	75	0.066	2	hsa-miR-27a-3p;hsa-miR-27b-3p
chr5	70344676-70344894	794	GTF2H2	ENST00000330280	EJC+miRNA	61	9	0.066	9	hsa-miR-186-5p;hsa-miR-27a-3p;hsa-miR-96-5p;hsa-miR-182-5p;hsa-miR-15b-3p;hsa-miR-27b-3p;hsa-miR-128-3p;hsa-miR-455-3p;hsa-miR-1271-5p
chrX	48664078-48664774	3884	HDAC6	ENST00000334136	EJC+miRNA	36	9	0.066	7	hsa-miR-15a-5p;hsa-miR-16-5p;hsa-miR-103a-3p;hsa-miR-107;hsa-miR-15b-5p;hsa-miR-424-5p;hsa-miR-503-5p
chr11	128843327-128844018	3826	ARHGAP32	ENST00000310343	EJC+miRNA	43	6	0.065	4	hsa-miR-103a-3p;hsa-miR-107;hsa-miR-1301-3p;hsa-miR-140-5p
chr2	27425748-27426100	976	SLC5A6	ENST00000310574	EJC+miRNA	185	31	0.065	5	hsa-miR-27a-3p;hsa-miR-196a-5p;hsa-miR-27b-3p;hsa-miR-128-3p;hsa-miR-196b-5p
chr6	35436804-35437157	748	RPL10A	ENST00000322203	EJC+miRNA	5204	778	0.065	14	hsa-miR-181a-5p;hsa-miR-181b-5p;hsa-miR-425-5p;hsa-miR-181d-5p;hsa-miR-9-5p;hsa-miR-27a-3p;hsa-miR-148a-3p;hsa-miR-27b-3p;hsa-miR-128-3p;hsa-miR-152-3p;hsa-miR-148b-3p;hsa-miR-146b-5p;hsa-miR-589-5p;hsa-miR-615-3p
chr12	6692279-6692363	1761	CHD4	ENST00000357008	EJC+miRNA	913	117	0.065	3	hsa-miR-301a-5p;hsa-miR-24-3p;hsa-miR-183-5p
chr1	45471555-45471668	770	HECTD3	ENST00000372172	EJC+miRNA	113	16	0.065	5	hsa-miR-192-5p;hsa-miR-128-3p;hsa-miR-4286;hsa-miR-500a-3p;hsa-miR-3909
chr2	86705858-86707289	3061	KDM3A	ENST00000409064	EJC+miRNA	86	12	0.065	2	hsa-miR-1301-3p;hsa-miR-140-3p
chr1	100573273-100573365	998	SASS6	ENST00000287482	EJC+miRNA	94	13	0.064	2	hsa-miR-17-3p;hsa-miR-148a-5p
chr15	85191185-85191767	1414	WDR73	ENST00000434634	EJC+miRNA	209	37	0.064	8	hsa-miR-18a-5p;hsa-miR-15a-5p;hsa-miR-16-5p;hsa-miR-103a-3p;hsa-miR-107;hsa-miR-15b-5p;hsa-miR-424-5p;hsa-miR-503-5p
chr14	94521530-94524167	3204	DDX24	ENST00000330836	EJC+miRNA	492	74	0.063	12	hsa-miR-140-3p;hsa-miR-31-5p;hsa-miR-148a-5p;hsa-miR-30a-5p;hsa-miR-30c-5p;hsa-miR-30d-5p;hsa-miR-30b-5p;hsa-miR-149-5p;hsa-miR-30e-5p;hsa-miR-1180-3p;hsa-miR-7974;hsa-miR-7974
chr1	20975125-20975487	776	PINK1	ENST00000321556	EJC+miRNA	295	39	0.062	8	hsa-miR-17-5p;hsa-miR-20a-5p;hsa-miR-93-5p;hsa-miR-106b-5p;hsa-miR-3065-5p;hsa-miR-196a-5p;hsa-miR-196b-5p;hsa-miR-454-3p
chr1	214504413-214505360	1210	SMYD2	ENST00000366957	EJC+miRNA	162	21	0.061	5	hsa-miR-30a-5p;hsa-miR-30c-5p;hsa-miR-30d-5p;hsa-miR-30b-5p;hsa-miR-30e-5p
chr12	96402926-96406965	4456	LTA4H	ENST00000228740	EJC+miRNA	110	30	0.06	10	hsa-miR-186-5p;hsa-miR-590-3p;hsa-miR-3065-5p;hsa-miR-582-5p;hsa-miR-501-3p;hsa-miR-502-3p;hsa-miR-9-5p;hsa-miR-183-5p;hsa-miR-3613-5p;hsa-miR-4286
chr10	92654648-92655210	596	RPP30	ENST00000277882	EJC+miRNA	82	25	0.06	7	hsa-miR-17-3p;hsa-miR-28-3p;hsa-miR-103a-3p;hsa-miR-107;hsa-miR-374a-5p;hsa-miR-1301-3p;hsa-miR-374b-5p
chr2	219526983-219527232	786	BCS1L	ENST00000359273	EJC+miRNA	150	24	0.06	12	hsa-miR-18a-5p;hsa-miR-148a-5p;hsa-miR-874-3p;hsa-miR-18a-5p;hsa-miR-455-3p;hsa-miR-15a-5p;hsa-miR-16-5p;hsa-miR-103a-3p;hsa-miR-107;hsa-miR-15b-5p;hsa-miR-424-5p;hsa-miR-503-5p
chr9	140347271-140347507	621	NELF	ENST00000371472	EJC+miRNA	222	30	0.06	6	hsa-miR-25-5p;hsa-miR-15a-5p;hsa-miR-16-5p;hsa-miR-15b-5p;hsa-miR-424-5p;hsa-miR-503-5p
chr12	56396055-56396326	1855	SUOX	ENST00000394115	EJC+miRNA	24	4	0.06	2	hsa-miR-27a-3p;hsa-miR-27b-3p
chrX	53227819-53227945	2439	KDM5C	ENST00000404049	EJC+miRNA	381	49	0.06	1	hsa-miR-140-5p
chr6	43164003-43164382	5143	CUL9	ENST00000252050	EJC+miRNA	24	3	0.059	12	hsa-miR-15a-5p;hsa-miR-16-5p;hsa-miR-17-3p;hsa-miR-24-3p;hsa-miR-103a-3p;hsa-miR-107;hsa-miR-15b-5p;hsa-miR-424-5p;hsa-miR-503-5p;hsa-miR-1301-3p;hsa-miR-3909;hsa-miR-548k
chr14	77745212-77746165	1286	POMT2	ENST00000261534	EJC+miRNA	64	8	0.059	2	hsa-miR-221-5p;hsa-miR-615-3p
chr1	150935615-150936005	753	SETDB1	ENST00000271640	EJC+miRNA	143	18	0.059	3	hsa-miR-148a-5p;hsa-miR-4286;hsa-miR-3613-5p
chr11	67375949-67376022	1295	NDUFV1	ENST00000322776	EJC+miRNA	707	72	0.059	4	hsa-miR-27a-3p;hsa-miR-27b-3p;hsa-miR-140-3p;hsa-miR-652-3p
chr5	139930754-139931566	1022	SRA1	ENST00000336283	EJC+miRNA	103	13	0.059	2	hsa-miR-192-5p;hsa-miR-345-5p
chr7	99696826-99696901	1761	MCM7	ENST00000362082	EJC+miRNA	1486	148	0.059	80	hsa-miR-1296-5p;hsa-miR-128-3p;hsa-miR-629-5p;hsa-miR-17-5p;hsa-miR-17-3p;hsa-miR-20a-5p;hsa-miR-92a-1-5p;hsa-miR-93-5p;hsa-miR-96-5p;hsa-miR-182-5p;hsa-miR-221-5p;hsa-miR-149-5p;hsa-miR-106b-5p;hsa-miR-378a-5p;hsa-miR-1271-5p;hsa-miR-484;hsa-miR-15a-5p;hsa-miR-16-5p;hsa-miR-22-3p;hsa-miR-23a-3p;hsa-miR-28-5p;hsa-miR-103a-3p;hsa-miR-107;hsa-miR-148a-3p;hsa-miR-15b-5p;hsa-miR-23b-3p;hsa-miR-152-3p…
chr9	134404425-134404514	353	UCK1	ENST00000372215	EJC+miRNA	197	23	0.058	2	hsa-miR-18a-5p;hsa-miR-1307-3p
chr2	74756409-74756488	898	AUP1	ENST00000377526	EJC+miRNA	459	47	0.058	19	hsa-miR-221-3p;hsa-miR-222-3p;hsa-miR-320a;hsa-miR-15a-5p;hsa-miR-16-5p;hsa-miR-103a-3p;hsa-miR-107;hsa-miR-15b-5p;hsa-miR-424-5p;hsa-miR-503-5p;hsa-miR-17-5p;hsa-miR-20a-5p;hsa-miR-93-5p;hsa-miR-140-3p;hsa-miR-106b-5p;hsa-miR-345-5p;hsa-miR-186-5p;hsa-miR-320a;hsa-miR-7974
chr15	91479212-91479514	2852	UNC45A	ENST00000418476	EJC+miRNA	105	25	0.058	17	hsa-let-7a-5p;hsa-let-7c-5p;hsa-let-7d-5p;hsa-let-7e-5p;hsa-let-7f-5p;hsa-miR-98-5p;hsa-let-7g-5p;hsa-let-7i-5p;hsa-miR-25-5p;hsa-miR-423-5p;hsa-miR-192-5p;hsa-miR-96-5p;hsa-miR-182-5p;hsa-miR-1271-5p;hsa-miR-769-5p;hsa-miR-1307-3p;hsa-miR-4286
chr19	18304278-18304673	713	MPV17L2	ENST00000247712	EJC+miRNA	67	8	0.056	4	hsa-miR-17-3p;hsa-miR-660-5p;hsa-miR-1301-3p;hsa-miR-454-3p
chr2	86357860-86358200	1114	PTCD3	ENST00000254630	EJC+miRNA	79	26	0.056	3	hsa-miR-582-5p;hsa-miR-92a-1-5p;hsa-miR-194-5p
chr15	91524899-91524977	1389	PRC1	ENST00000394249	EJC+miRNA	957	93	0.056	8	hsa-miR-130b-5p;hsa-miR-342-3p;hsa-miR-450b-5p;hsa-miR-1260b;hsa-miR-197-3p;hsa-miR-365b-3p;hsa-miR-532-5p;hsa-miR-130b-5p
chr11	6500488-6501201	1538	ARFIP2	ENST00000396777	EJC+miRNA	244	29	0.056	14	hsa-miR-15a-5p;hsa-miR-15a-5p;hsa-miR-16-5p;hsa-miR-16-5p;hsa-miR-22-3p;hsa-miR-103a-3p;hsa-miR-107;hsa-miR-15b-5p;hsa-miR-15b-5p;hsa-miR-424-5p;hsa-miR-424-5p;hsa-miR-503-5p;hsa-miR-503-5p;hsa-miR-548k
chr11	6630198-6630301	926	ILK	ENST00000420936	EJC+miRNA	259	32	0.056	1	hsa-miR-21-5p
chr22	19165378-19165454	430	SLC25A1	ENST00000215882	EJC+miRNA	324	30	0.055	6	hsa-miR-149-5p;hsa-miR-1180-3p;hsa-miR-148a-3p;hsa-miR-152-3p;hsa-miR-148b-3p;hsa-miR-874-3p
chr3	49742189-49742416	1874	RNF123	ENST00000327697	EJC+miRNA	52	6	0.055	6	hsa-miR-455-3p;hsa-miR-3909;hsa-miR-26a-5p;hsa-miR-26b-5p;hsa-miR-30e-3p;hsa-miR-3909
chr3	52436887-52437153	538	BAP1	ENST00000296288	EJC+miRNA	344	39	0.054	1	hsa-miR-18a-5p
chr7	2578398-2578812	880	BRAT1	ENST00000340611	EJC+miRNA	175	20	0.054	6	hsa-miR-17-3p;hsa-miR-103a-3p;hsa-miR-107;hsa-miR-128-3p;hsa-miR-1301-3p;hsa-miR-1307-3p
chr20	57564076-57564542	1633	TH1L	ENST00000344018	EJC+miRNA	327	37	0.054	3	hsa-miR-197-3p;hsa-miR-17-3p;hsa-miR-1301-3p
chr5	179048036-179048242	1298	HNRNPH1	ENST00000393432	EJC+miRNA	3502	401	0.054	10	hsa-miR-221-3p;hsa-miR-222-3p;hsa-miR-218-5p;hsa-miR-548k;hsa-miR-340-5p;hsa-miR-22-3p;hsa-miR-149-5p;hsa-miR-149-5p;hsa-miR-378a-3p;hsa-miR-4286
chr12	124090528-124090619	1685	DDX55	ENST00000238146	EJC+miRNA	45	8	0.053	13	hsa-miR-505-3p;hsa-miR-421;hsa-miR-3065-5p;hsa-miR-25-3p;hsa-miR-92a-3p;hsa-miR-363-3p;hsa-miR-92b-3p;hsa-miR-501-3p;hsa-miR-502-3p;hsa-miR-197-3p;hsa-miR-769-5p;hsa-miR-941;hsa-miR-1180-3p
chr12	57905886-57906018	1196	MARS	ENST00000262027	EJC+miRNA	555	62	0.053	19	hsa-miR-149-5p;hsa-miR-194-5p;hsa-miR-3613-5p;hsa-miR-425-5p;hsa-miR-24-3p;hsa-miR-15a-5p;hsa-miR-15a-5p;hsa-miR-16-5p;hsa-miR-16-5p;hsa-miR-103a-3p;hsa-miR-107;hsa-miR-15b-5p;hsa-miR-15b-5p;hsa-miR-424-5p;hsa-miR-424-5p;hsa-miR-503-5p;hsa-miR-503-5p;hsa-miR-9-5p;hsa-miR-1296-5p
chr1	202104654-202104834	288	ARL8A	ENST00000272217	EJC+miRNA	89	12	0.053	7	hsa-miR-15a-5p;hsa-miR-16-5p;hsa-miR-103a-3p;hsa-miR-107;hsa-miR-15b-5p;hsa-miR-424-5p;hsa-miR-503-5p
chr12	49959998-49960504	1877	MCRS1	ENST00000343810	EJC+miRNA	404	45	0.053	7	hsa-miR-4286;hsa-miR-103a-3p;hsa-miR-107;hsa-miR-7-5p;hsa-miR-125b-5p;hsa-miR-125a-5p;hsa-miR-484
chr1	24124720-24125104	1080	GALE	ENST00000374497	EJC+miRNA	89	10	0.053	1	hsa-miR-874-3p
chr12	56572318-56572593	2542	SMARCC2	ENST00000394023	EJC+miRNA	104	22	0.053	21	hsa-miR-7-5p;hsa-miR-423-3p;hsa-miR-501-3p;hsa-miR-502-3p;hsa-miR-1260b;hsa-miR-221-5p;hsa-miR-615-3p;hsa-miR-29a-3p;hsa-miR-130b-5p;hsa-miR-15a-5p;hsa-miR-16-5p;hsa-miR-103a-3p;hsa-miR-107;hsa-miR-15b-5p;hsa-miR-185-5p;hsa-miR-424-5p;hsa-miR-503-5p;hsa-miR-874-3p;hsa-miR-92a-1-5p;hsa-miR-221-5p;hsa-miR-221-5p
chr11	61183256-61183576	734	CPSF7	ENST00000439958	EJC+miRNA	347	39	0.053	6	hsa-miR-183-5p;hsa-miR-9-5p;hsa-miR-96-5p;hsa-miR-182-5p;hsa-miR-1271-5p;hsa-miR-941
chr3	183882719-183882900	1678	DVL3	ENST00000313143	EJC+miRNA	138	15	0.052	3	hsa-miR-18a-5p;hsa-miR-423-3p;hsa-miR-9-5p
chr12	12976253-12976803	1150	DDX47	ENST00000358007	EJC+miRNA	283	31	0.052	11	hsa-let-7a-5p;hsa-let-7c-5p;hsa-let-7d-5p;hsa-let-7e-5p;hsa-let-7f-5p;hsa-miR-98-5p;hsa-let-7g-5p;hsa-let-7i-5p;hsa-miR-1307-3p;hsa-miR-183-5p;hsa-miR-423-5p
chr2	1667535-1668729	3957	PXDN	ENST00000252804	EJC+miRNA	56	6	0.051	11	hsa-miR-423-5p;hsa-miR-582-5p;hsa-miR-3613-5p;hsa-miR-25-3p;hsa-miR-92a-3p;hsa-miR-10a-5p;hsa-miR-10b-5p;hsa-miR-363-3p;hsa-miR-339-5p;hsa-miR-486-5p;hsa-miR-92b-3p
chr1	161143517-161143648	443	B4GALT3	ENST00000319769	EJC+miRNA	222	24	0.051	5	hsa-miR-340-5p;hsa-miR-92a-1-5p;hsa-miR-96-5p;hsa-miR-182-5p;hsa-miR-1271-5p
chr1	227171555-227171794	924	ADCK3	ENST00000366777	EJC+miRNA	131	14	0.051	1	hsa-miR-15b-3p
chr8	145066246-145066412	586	GRINA	ENST00000395068	EJC+miRNA	594	64	0.051	2	hsa-miR-7-5p;hsa-miR-652-3p
chr9	98212222-98215759	4401	PTCH1	ENST00000429896	EJC+miRNA	37	4	0.051	3	hsa-miR-365b-3p;hsa-miR-1296-5p;hsa-miR-874-3p
chr3	49751258-49751342	1069	RNF123	ENST00000327697	EJC+miRNA	60	6	0.05	6	hsa-miR-455-3p;hsa-miR-3909;hsa-miR-26a-5p;hsa-miR-26b-5p;hsa-miR-30e-3p;hsa-miR-3909
chr2	197711924-197712670	1496	PGAP1	ENST00000354764	EJC+miRNA	28	3	0.05	1	hsa-miR-186-5p
chr1	202935121-202935655	1143	CYB5R1	ENST00000367249	EJC+miRNA	115	14	0.05	11	hsa-let-7a-5p;hsa-let-7c-5p;hsa-let-7d-5p;hsa-let-7e-5p;hsa-let-7f-5p;hsa-miR-98-5p;hsa-miR-196a-5p;hsa-let-7g-5p;hsa-let-7i-5p;hsa-miR-185-5p;hsa-miR-196b-5p
chr14	35871869-35871976	344	NFKBIA	ENST00000216797	EJC+miRNA	86	9	0.049	2	hsa-miR-103a-3p;hsa-miR-107
chr2	220092535-220092643	2508	ATG9A	ENST00000396761	EJC+miRNA	64	11	0.049	24	hsa-miR-96-5p;hsa-miR-182-5p;hsa-miR-1271-5p;hsa-miR-15a-5p;hsa-miR-16-5p;hsa-miR-103a-3p;hsa-miR-107;hsa-miR-196a-5p;hsa-miR-15b-5p;hsa-miR-196b-5p;hsa-miR-424-5p;hsa-miR-503-5p;hsa-miR-769-5p;hsa-miR-3613-5p;hsa-miR-28-5p;hsa-miR-708-5p;hsa-miR-1260b;hsa-miR-17-5p;hsa-miR-20a-5p;hsa-miR-92a-1-5p;hsa-miR-93-5p;hsa-miR-183-5p;hsa-miR-106b-5p;hsa-miR-454-3p
chrX	47106818-47107009	337	USP11	ENST00000218348	EJC+miRNA	381	39	0.048	3	hsa-miR-221-5p;hsa-miR-548k;hsa-miR-185-5p
chr7	2581845-2582837	2404	BRAT1	ENST00000340611	EJC+miRNA	157	16	0.048	7	hsa-miR-301a-5p;hsa-miR-17-3p;hsa-miR-103a-3p;hsa-miR-107;hsa-miR-128-3p;hsa-miR-1301-3p;hsa-miR-1307-3p
chr11	63764120-63764328	682	OTUB1	ENST00000538426	EJC+miRNA	687	73	0.048	13	hsa-miR-196a-5p;hsa-miR-196b-5p;hsa-miR-7-5p;hsa-miR-15a-5p;hsa-miR-16-5p;hsa-miR-196a-5p;hsa-miR-196a-5p;hsa-miR-15b-5p;hsa-miR-140-3p;hsa-miR-196b-5p;hsa-miR-196b-5p;hsa-miR-424-5p;hsa-miR-503-5p
chr12	56998583-56998856	3198	BAZ2A	ENST00000551812	EJC+miRNA	109	11	0.048	15	hsa-miR-28-5p;hsa-miR-708-5p;hsa-miR-361-5p;hsa-miR-25-3p;hsa-miR-92a-3p;hsa-miR-149-5p;hsa-miR-363-3p;hsa-miR-484;hsa-miR-92b-3p;hsa-miR-27a-3p;hsa-miR-101-3p;hsa-miR-27b-3p;hsa-miR-128-3p;hsa-miR-185-5p;hsa-miR-342-3p
chr12	58140039-58140371	614	TSPAN31	ENST00000257910	EJC+miRNA	103	11	0.047	5	hsa-miR-92a-1-5p;hsa-miR-362-5p;hsa-miR-9-3p;hsa-miR-186-5p;hsa-miR-320a
chr12	112477143-112478284	1480	NAA25	ENST00000261745	EJC+miRNA	101	10	0.047	6	hsa-miR-27a-3p;hsa-miR-27b-3p;hsa-miR-342-3p;hsa-miR-19a-3p;hsa-miR-19b-3p;hsa-miR-454-3p
chr6	91260268-91261767	2366	MAP3K7	ENST00000369332	EJC+miRNA	217	23	0.047	1	hsa-miR-450b-5p
chr10	1089333-1089938	1136	IDI1	ENST00000381344	EJC+miRNA	853	84	0.047	3	hsa-miR-197-3p;hsa-miR-3065-5p;hsa-miR-1260b
chr6	79665399-79668191	4433	PHIP	ENST00000275034	EJC+miRNA	53	6	0.046	14	hsa-miR-769-5p;hsa-miR-17-5p;hsa-miR-20a-5p;hsa-miR-93-5p;hsa-miR-106b-5p;hsa-miR-340-5p;hsa-miR-1301-3p;hsa-miR-450b-5p;hsa-miR-25-3p;hsa-miR-92a-3p;hsa-miR-363-3p;hsa-miR-92b-3p;hsa-miR-501-3p;hsa-miR-502-3p
chr7	142997387-143000876	3249	CASP2	ENST00000310447	EJC+miRNA	165	16	0.046	2	hsa-miR-505-3p;hsa-miR-4286
chr17	18140253-18140794	2121	LLGL1	ENST00000316843	EJC+miRNA	220	21	0.046	7	hsa-miR-10a-3p;hsa-miR-1180-3p;hsa-miR-15a-5p;hsa-miR-16-5p;hsa-miR-15b-5p;hsa-miR-424-5p;hsa-miR-503-5p
chr6	31605101-31605222	229	PRRC2A	ENST00000376007	miRNA	865	84	0.046	3	hsa-miR-27a-3p;hsa-miR-27b-3p;hsa-miR-128-3p
chr11	14535433-14535948	947	PSMA1	ENST00000396393	EJC+miRNA	708	83	0.046	1	hsa-miR-769-5p
chr15	42104851-42105116	4001	MAPKBP1	ENST00000457542	EJC+miRNA	31	3	0.046	7	hsa-miR-15a-5p;hsa-miR-16-5p;hsa-miR-15b-5p;hsa-miR-125b-5p;hsa-miR-125a-5p;hsa-miR-424-5p;hsa-miR-503-5p
chr19	36037710-36037846	364	TMEM147	ENST00000222284	EJC+miRNA	474	47	0.045	1	hsa-miR-18a-5p
chr2	201778136-201778653	583	ORC2	ENST00000234296	EJC+miRNA	125	15	0.045	4	hsa-miR-365b-3p;hsa-miR-151a-5p;hsa-miR-532-5p;hsa-miR-151b
chr11	61188045-61188861	1874	CPSF7	ENST00000439958	EJC+miRNA	287	27	0.045	31	hsa-miR-30e-3p;hsa-miR-3065-5p;hsa-miR-103a-3p;hsa-miR-107;hsa-miR-1296-5p;hsa-let-7a-5p;hsa-let-7a-5p;hsa-let-7c-5p;hsa-let-7c-5p;hsa-let-7d-5p;hsa-let-7d-5p;hsa-let-7e-5p;hsa-let-7e-5p;hsa-let-7f-5p;hsa-let-7f-5p;hsa-miR-98-5p;hsa-miR-98-5p;hsa-let-7g-5p;hsa-let-7g-5p;hsa-let-7i-5p;hsa-let-7i-5p;hsa-miR-151a-5p;hsa-miR-151b;hsa-miR-7-5p;hsa-miR-4286;hsa-miR-183-5p;hsa-miR-9-5p;hsa-miR-96-5p;hsa…

## Sheet: HeLa
Chrom.	Loc.	Length of PTC-STOP region	Transcript Name	Transcript ID	NMD Type	Reads of Sikp IR	Reads of IR	% IR Level	Total Predicted miREs	miRE
chr20	44987197-44987329	1183	SLC35C2	ENST00000543605	EJC+miRNA	1	103	0.978	20	hsa-miR-103a-3p;hsa-miR-107;hsa-let-7a-5p;hsa-let-7b-5p;hsa-let-7c-5p;hsa-let-7d-5p;hsa-let-7e-5p;hsa-let-7f-5p;hsa-miR-29a-3p;hsa-miR-98-5p;hsa-miR-196a-5p;hsa-let-7g-5p;hsa-let-7i-5p;hsa-miR-140-3p;hsa-miR-339-5p;hsa-miR-29a-3p;hsa-miR-361-3p;hsa-miR-365b-3p;hsa-miR-185-5p;hsa-miR-365b-3p
chr2	105959431-105959557	303	C2orf49	ENST00000410049	EJC+miRNA	6	55	0.821	1	hsa-miR-224-5p
chr12	6572008-6574055	1957	VAMP1	ENST00000400911	EJC+miRNA	1	9	0.757	7	hsa-miR-183-5p;hsa-miR-15a-5p;hsa-miR-16-5p;hsa-miR-103a-3p;hsa-miR-107;hsa-miR-15b-5p;hsa-miR-186-5p
chr21	46642022-46645461	3358	ADARB1	ENST00000389863	miRNA	5	31	0.754	159	hsa-miR-17-5p;hsa-miR-20a-5p;hsa-miR-93-5p;hsa-miR-145-3p;hsa-miR-185-5p;hsa-miR-186-5p;hsa-miR-106b-5p;hsa-miR-149-5p;hsa-miR-193b-3p;hsa-miR-532-5p;hsa-miR-18a-5p;hsa-miR-7-5p;hsa-miR-183-5p;hsa-miR-221-5p;hsa-miR-221-5p;hsa-miR-378a-3p;hsa-miR-329-3p;hsa-miR-769-5p;hsa-miR-495-3p;hsa-miR-17-5p;hsa-miR-17-5p;hsa-miR-20a-5p;hsa-miR-20a-5p;hsa-miR-93-5p;hsa-miR-93-5p;hsa-miR-185-5p;hsa-miR-106b-5…
chr6	28327765-28329100	2415	ZKSCAN3	ENST00000252211	EJC+miRNA	1	5	0.714	9	hsa-miR-23a-3p;hsa-miR-197-3p;hsa-miR-181a-5p;hsa-miR-181b-5p;hsa-miR-23b-3p;hsa-miR-629-5p;hsa-miR-27a-3p;hsa-miR-27b-3p;hsa-miR-128-3p
chr9	140009028-140009098	1433	DPP7	ENST00000371579	EJC+miRNA	5	17	0.676	13	hsa-miR-10a-5p;hsa-miR-10b-5p;hsa-miR-1180-3p;hsa-miR-148a-3p;hsa-miR-152-3p;hsa-miR-148b-3p;hsa-miR-423-3p;hsa-miR-15a-5p;hsa-miR-16-5p;hsa-miR-15b-5p;hsa-miR-221-5p;hsa-miR-149-5p;hsa-miR-149-5p
chrX	53964492-53965594	990	PHF8	ENST00000396282	EJC+miRNA	8	34	0.67	3	hsa-miR-181a-2-3p;hsa-miR-378a-3p;hsa-miR-484
chr3	39141945-39142237	631	GORASP1	ENST00000453680	EJC+miRNA	4	14	0.636	1	hsa-miR-185-5p
chr3	52440338-52440844	1901	BAP1	ENST00000296288	EJC+miRNA	12	45	0.581	1	hsa-miR-18a-5p
chr3	42661200-42662920	5819	NKTR	ENST00000232978	EJC+miRNA	2	8	0.533	8	hsa-miR-30a-5p;hsa-miR-30c-5p;hsa-miR-30d-5p;hsa-miR-30b-5p;hsa-miR-30e-5p;hsa-miR-335-3p;hsa-miR-582-3p;hsa-miR-27b-5p
chr22	46751485-46752738	1358	TRMU	ENST00000381019	miRNA	8	18	0.529	8	hsa-miR-15a-5p;hsa-miR-16-5p;hsa-miR-103a-3p;hsa-miR-107;hsa-miR-15b-5p;hsa-miR-615-3p;hsa-miR-28-5p;hsa-miR-29a-3p
chr12	7060894-7061145	1904	PTPN6	ENST00000399448	EJC+miRNA	1	2	0.5	4	hsa-miR-10a-5p;hsa-miR-10b-5p;hsa-miR-370-3p;hsa-miR-574-5p
chr16	277335-278331	972	LUC7L	ENST00000419516	EJC+miRNA	6	14	0.498	5	hsa-let-7a-3p;hsa-miR-19a-3p;hsa-miR-19b-3p;hsa-miR-381-3p;hsa-miR-22-3p
chr6	161574531-161575180	1225	AGPAT4	ENST00000320285	EJC+miRNA	4	6	0.429	2	hsa-miR-329-3p;hsa-miR-7-5p
chrX	70764485-70767756	5869	OGT	ENST00000373719	EJC+miRNA	49	83	0.417	78	hsa-let-7a-3p;hsa-miR-381-3p;hsa-miR-582-5p;hsa-miR-196a-5p;hsa-miR-381-3p;hsa-let-7a-3p;hsa-miR-181a-2-3p;hsa-miR-500a-3p;hsa-miR-17-5p;hsa-miR-20a-5p;hsa-miR-25-3p;hsa-miR-92a-3p;hsa-miR-93-5p;hsa-miR-106b-5p;hsa-miR-335-3p;hsa-miR-92b-3p;hsa-miR-19a-3p;hsa-miR-19b-3p;hsa-miR-454-3p;hsa-let-7a-5p;hsa-let-7b-5p;hsa-let-7c-5p;hsa-let-7d-5p;hsa-let-7e-5p;hsa-let-7f-5p;hsa-miR-17-5p;hsa-miR-20a-5p;…
chr1	26610973-26611954	1569	UBXN11	ENST00000314675	EJC+miRNA	20	31	0.414	6	hsa-miR-28-3p;hsa-miR-148a-3p;hsa-miR-152-3p;hsa-miR-148b-3p;hsa-miR-29a-3p;hsa-miR-370-3p
chr7	102963079-102963149	1078	DNAJC2	ENST00000379263	EJC+miRNA	44	45	0.408	1	hsa-miR-7-5p
chr3	180326598-180327417	1728	TTC14	ENST00000296015	miRNA	16	20	0.385	14	hsa-let-7a-5p;hsa-let-7b-5p;hsa-let-7c-5p;hsa-let-7d-5p;hsa-let-7e-5p;hsa-let-7f-5p;hsa-miR-98-5p;hsa-let-7g-5p;hsa-let-7i-5p;hsa-miR-574-5p;hsa-miR-454-3p;hsa-miR-130b-5p;hsa-miR-362-5p;hsa-miR-370-3p
chr19	48735750-48737659	3103	CARD8	ENST00000520153	EJC+miRNA	1	2	0.364	3	hsa-miR-370-3p;hsa-miR-423-5p;hsa-miR-629-5p
chr17	36361804-36365054	4126	RP11-1407O15.2.1	ENST00000312412	EJC+miRNA	2	2	0.333	37	hsa-miR-654-3p;hsa-miR-15a-5p;hsa-miR-15a-5p;hsa-miR-16-5p;hsa-miR-16-5p;hsa-miR-103a-3p;hsa-miR-103a-3p;hsa-miR-107;hsa-miR-107;hsa-miR-15b-5p;hsa-miR-15b-5p;hsa-let-7a-5p;hsa-let-7b-5p;hsa-let-7c-5p;hsa-let-7d-5p;hsa-let-7e-5p;hsa-let-7f-5p;hsa-miR-98-5p;hsa-miR-196a-5p;hsa-let-7g-5p;hsa-let-7i-5p;hsa-miR-379-5p;hsa-miR-345-5p;hsa-miR-495-3p;hsa-miR-495-3p;hsa-miR-148a-3p;hsa-miR-152-3p;hsa-miR…
chr9	140507458-140507911	1383	ARRDC1	ENST00000371421	EJC+miRNA	11	12	0.271	6	hsa-miR-27a-3p;hsa-miR-27a-3p;hsa-miR-27b-3p;hsa-miR-27b-3p;hsa-miR-128-3p;hsa-miR-1180-3p
chr6	52317635-52318892	2343	EFHC1	ENST00000371068	EJC+miRNA	15	11	0.268	8	hsa-miR-27a-3p;hsa-miR-27b-3p;hsa-miR-186-5p;hsa-miR-654-3p;hsa-miR-15a-5p;hsa-miR-16-5p;hsa-miR-15b-5p;hsa-miR-186-5p
chr14	24032711-24032792	1095	AP1G2	ENST00000397120	EJC+miRNA	9	7	0.252	5	hsa-miR-2355-5p;hsa-miR-15a-5p;hsa-miR-16-5p;hsa-miR-221-5p;hsa-miR-15b-5p
chr8	145725582-145725649	805	PPP1R16A	ENST00000435887	EJC+miRNA	34	16	0.25	1	hsa-miR-24-3p
chr12	122967891-122968006	1420	ZCCHC8	ENST00000336229	EJC+miRNA	13	10	0.24	5	hsa-miR-2355-5p;hsa-miR-146b-5p;hsa-miR-589-5p;hsa-miR-145-5p;hsa-miR-145-3p
chr10	24834032-24834755	1206	KIAA1217	ENST00000450158	miRNA	21	13	0.236	7	hsa-miR-138-5p;hsa-miR-192-5p;hsa-miR-28-3p;hsa-miR-197-3p;hsa-miR-25-3p;hsa-miR-92a-3p;hsa-miR-92b-3p
chr5	140047919-140047999	818	WDR55	ENST00000358337	EJC+miRNA	50	27	0.235	8	hsa-miR-15a-5p;hsa-miR-16-5p;hsa-miR-15b-5p;hsa-miR-2355-5p;hsa-miR-654-3p;hsa-miR-145-5p;hsa-miR-370-3p;hsa-miR-494-3p
chr6	43410897-43411670	2737	ABCC10	ENST00000372530	EJC+miRNA	5	3	0.215	15	hsa-let-7a-5p;hsa-let-7b-5p;hsa-let-7c-5p;hsa-let-7d-5p;hsa-let-7e-5p;hsa-let-7f-5p;hsa-miR-28-5p;hsa-miR-98-5p;hsa-miR-196a-5p;hsa-miR-34a-5p;hsa-let-7g-5p;hsa-let-7i-5p;hsa-miR-191-5p;hsa-miR-379-5p;hsa-miR-654-3p
chr3	48607611-48607707	1422	COL7A1	ENST00000328333	EJC+miRNA	1	4	0.209	7	hsa-miR-103a-3p;hsa-miR-107;hsa-miR-34a-5p;hsa-miR-28-5p;hsa-miR-27b-5p;hsa-miR-27a-3p;hsa-miR-27b-3p
chr8	145725774-145725869	975	PPP1R16A	ENST00000435887	EJC+miRNA	17	9	0.209	1	hsa-miR-24-3p
chr5	141041356-141041609	1585	ARAP3	ENST00000239440	EJC+miRNA	8	4	0.2	2	hsa-miR-22-3p;hsa-miR-145-5p
chr5	43161708-43161810	1140	ZNF131	ENST00000306938	EJC+miRNA	100	48	0.194	13	hsa-miR-181a-2-3p;hsa-miR-193b-3p;hsa-miR-128-3p;hsa-miR-500a-3p;hsa-miR-501-3p;hsa-miR-30a-3p;hsa-miR-96-5p;hsa-miR-182-5p;hsa-miR-30e-3p;hsa-miR-1271-5p;hsa-miR-25-3p;hsa-miR-92a-3p;hsa-miR-92b-3p
chr14	24030844-24031170	813	AP1G2	ENST00000397120	EJC+miRNA	17	8	0.19	5	hsa-miR-2355-5p;hsa-miR-15a-5p;hsa-miR-16-5p;hsa-miR-221-5p;hsa-miR-15b-5p
chrX	48664078-48664774	3903	HDAC6	ENST00000444343	EJC+miRNA	5	4	0.186	4	hsa-miR-143-3p;hsa-miR-454-3p;hsa-miR-29a-3p;hsa-miR-769-5p
chr16	57062067-57062213	3584	NLRC5	ENST00000262510	EJC+miRNA	6	3	0.183	8	hsa-miR-25-3p;hsa-miR-92a-3p;hsa-miR-361-3p;hsa-miR-92b-3p;hsa-miR-27a-3p;hsa-miR-27b-3p;hsa-miR-342-3p;hsa-miR-484
chr22	29684775-29687553	3768	EWSR1	ENST00000406548	EJC+miRNA	20	18	0.182	9	hsa-miR-615-3p;hsa-miR-96-5p;hsa-miR-34a-5p;hsa-miR-182-5p;hsa-miR-1271-5p;hsa-miR-196a-5p;hsa-miR-379-5p;hsa-miR-362-5p;hsa-miR-493-5p
chr5	178043949-178044344	1037	CLK4	ENST00000536763	EJC+miRNA	13	7	0.182	6	hsa-miR-17-5p;hsa-miR-20a-5p;hsa-miR-93-5p;hsa-miR-106b-5p;hsa-miR-224-5p;hsa-miR-186-5p
chr6	30313005-30313074	474	RPP21	ENST00000442966	EJC+miRNA	91	32	0.178	6	hsa-miR-31-5p;hsa-miR-96-5p;hsa-miR-182-5p;hsa-miR-1271-5p;hsa-miR-29a-3p;hsa-miR-615-3p
chr14	50246393-50246465	396	KLHDC2	ENST00000554589	EJC+miRNA	20	9	0.177	3	hsa-miR-96-5p;hsa-miR-182-5p;hsa-miR-1271-5p
chr19	19767575-19767655	2605	ATP13A1	ENST00000291503	EJC+miRNA	44	18	0.172	21	hsa-miR-494-3p;hsa-miR-1180-3p;hsa-miR-30a-3p;hsa-miR-181a-5p;hsa-miR-181b-5p;hsa-miR-138-5p;hsa-miR-30e-3p;hsa-miR-335-3p;hsa-miR-193b-3p;hsa-miR-103a-3p;hsa-miR-107;hsa-miR-2355-5p;hsa-miR-186-5p;hsa-miR-582-3p;hsa-miR-24-3p;hsa-miR-484;hsa-miR-493-5p;hsa-miR-30a-3p;hsa-miR-7-5p;hsa-miR-30e-3p;hsa-miR-2355-5p
chr7	4829560-4830089	1144	KIAA0415	ENST00000348624	EJC+miRNA	24	10	0.172	1	hsa-miR-27a-5p
chr14	24033065-24033254	1231	AP1G2	ENST00000397120	EJC+miRNA	17	7	0.171	5	hsa-miR-2355-5p;hsa-miR-15a-5p;hsa-miR-16-5p;hsa-miR-221-5p;hsa-miR-15b-5p
chr14	24035101-24035272	1868	AP1G2	ENST00000397120	EJC+miRNA	22	10	0.17	5	hsa-miR-2355-5p;hsa-miR-15a-5p;hsa-miR-16-5p;hsa-miR-221-5p;hsa-miR-15b-5p
chr3	180680728-180680815	816	FXR1	ENST00000480918	EJC+miRNA	38	33	0.165	7	hsa-miR-21-3p;hsa-miR-494-3p;hsa-miR-574-5p;hsa-miR-21-5p;hsa-miR-23a-3p;hsa-miR-23b-3p;hsa-miR-769-5p
chr2	136511137-136511728	1830	UBXN4	ENST00000272638	EJC+miRNA	15	14	0.161	6	hsa-miR-31-5p;hsa-miR-183-5p;hsa-miR-452-5p;hsa-miR-31-5p;hsa-miR-145-5p;hsa-miR-335-3p
chr14	24031275-24031496	849	AP1G2	ENST00000397120	EJC+miRNA	16	6	0.158	5	hsa-miR-2355-5p;hsa-miR-15a-5p;hsa-miR-16-5p;hsa-miR-221-5p;hsa-miR-15b-5p
chr5	176562201-176562941	7847	NSD1	ENST00000347982	EJC+miRNA	43	16	0.155	52	hsa-miR-28-5p;hsa-miR-2355-5p;hsa-miR-145-5p;hsa-miR-149-5p;hsa-miR-2355-5p;hsa-miR-19a-3p;hsa-miR-19b-3p;hsa-miR-454-3p;hsa-miR-27a-3p;hsa-miR-103a-3p;hsa-miR-107;hsa-miR-27b-3p;hsa-miR-128-3p;hsa-miR-30a-3p;hsa-miR-30e-3p;hsa-miR-25-3p;hsa-miR-92a-3p;hsa-miR-409-3p;hsa-miR-92b-3p;hsa-miR-15a-5p;hsa-miR-16-5p;hsa-miR-27a-3p;hsa-miR-31-5p;hsa-miR-103a-3p;hsa-miR-107;hsa-miR-15b-5p;hsa-miR-15b-3p;…
chr14	24034910-24035024	1815	AP1G2	ENST00000397120	EJC+miRNA	14	5	0.152	5	hsa-miR-2355-5p;hsa-miR-15a-5p;hsa-miR-16-5p;hsa-miR-221-5p;hsa-miR-15b-5p
chr7	100174777-100174895	803	LRCH4	ENST00000310300	EJC+miRNA	5	2	0.144	13	hsa-miR-181a-2-3p;hsa-miR-193b-3p;hsa-miR-1307-3p;hsa-miR-15a-5p;hsa-miR-15a-5p;hsa-miR-16-5p;hsa-miR-16-5p;hsa-miR-103a-3p;hsa-miR-103a-3p;hsa-miR-107;hsa-miR-107;hsa-miR-15b-5p;hsa-miR-15b-5p
chr9	27558605-27560224	2306	C9orf72	ENST00000380003	EJC+miRNA	8	3	0.141	5	hsa-miR-23a-3p;hsa-miR-23b-3p;hsa-miR-27a-3p;hsa-miR-27b-3p;hsa-miR-128-3p
chr11	63713407-63714422	1357	NAA40	ENST00000377793	EJC+miRNA	13	6	0.139	8	hsa-miR-148a-3p;hsa-miR-128-3p;hsa-miR-140-3p;hsa-miR-152-3p;hsa-miR-148b-3p;hsa-miR-2355-5p;hsa-miR-452-5p;hsa-miR-582-3p
chr1	100606070-100606407	1255	CCDC76	ENST00000370141	EJC+miRNA	25	8	0.138	5	hsa-miR-103a-3p;hsa-miR-107;hsa-miR-193b-3p;hsa-miR-582-3p;hsa-miR-335-3p
chr16	839125-839209	2724	CHTF18	ENST00000262315	EJC+miRNA	7	2	0.136	7	hsa-miR-125b-5p;hsa-miR-125a-5p;hsa-miR-484;hsa-miR-493-5p;hsa-miR-335-3p;hsa-miR-484;hsa-miR-493-5p
chr3	50138038-50140515	4345	RBM5	ENST00000347869	EJC+miRNA	34	13	0.135	9	hsa-miR-1180-3p;hsa-miR-370-3p;hsa-miR-26a-5p;hsa-miR-26b-5p;hsa-miR-148a-3p;hsa-miR-128-3p;hsa-miR-140-3p;hsa-miR-152-3p;hsa-miR-148b-3p
chr5	178044435-178045556	1854	CLK4	ENST00000536763	EJC+miRNA	26	8	0.133	11	hsa-miR-25-3p;hsa-miR-92a-3p;hsa-miR-378a-3p;hsa-miR-501-3p;hsa-miR-92b-3p;hsa-miR-17-5p;hsa-miR-20a-5p;hsa-miR-93-5p;hsa-miR-106b-5p;hsa-miR-224-5p;hsa-miR-186-5p
chr6	43487576-43487803	882	POLR1C	ENST00000372389	EJC+miRNA	120	35	0.127	7	hsa-miR-15a-5p;hsa-miR-16-5p;hsa-miR-103a-3p;hsa-miR-107;hsa-miR-192-5p;hsa-miR-15b-5p;hsa-miR-454-3p
chr2	182781154-182783324	3157	SSFA2	ENST00000431877	EJC+miRNA	141	45	0.127	30	hsa-miR-340-3p;hsa-miR-2355-5p;hsa-miR-15a-5p;hsa-miR-15a-5p;hsa-miR-16-5p;hsa-miR-16-5p;hsa-miR-103a-3p;hsa-miR-103a-3p;hsa-miR-107;hsa-miR-107;hsa-miR-15b-5p;hsa-miR-15b-5p;hsa-miR-146b-5p;hsa-miR-589-5p;hsa-let-7a-5p;hsa-let-7b-5p;hsa-let-7c-5p;hsa-let-7d-5p;hsa-let-7e-5p;hsa-let-7f-5p;hsa-miR-17-5p;hsa-miR-20a-5p;hsa-miR-93-5p;hsa-miR-98-5p;hsa-miR-196a-5p;hsa-let-7g-5p;hsa-let-7i-5p;hsa-miR-…
chr11	46564531-46564801	3042	AMBRA1	ENST00000533727	EJC+miRNA	22	6	0.12	7	hsa-miR-138-5p;hsa-miR-335-5p;hsa-miR-31-5p;hsa-miR-103a-3p;hsa-miR-107;hsa-miR-138-5p;hsa-miR-484
chr14	23239487-23239669	692	OXA1L	ENST00000285848	EJC+miRNA	180	50	0.118	12	hsa-let-7a-5p;hsa-let-7b-5p;hsa-let-7c-5p;hsa-let-7d-5p;hsa-let-7e-5p;hsa-let-7f-5p;hsa-miR-98-5p;hsa-let-7g-5p;hsa-let-7i-5p;hsa-miR-493-5p;hsa-miR-361-5p;hsa-miR-425-5p
chr6	52957622-52958263	1007	FBXO9	ENST00000370939	EJC+miRNA	72	19	0.116	9	hsa-miR-493-5p;hsa-miR-532-5p;hsa-miR-18a-5p;hsa-miR-31-5p;hsa-miR-31-5p;hsa-miR-96-5p;hsa-miR-182-5p;hsa-miR-425-5p;hsa-miR-1271-5p
chr11	134129639-134130937	1424	ACAD8	ENST00000537915	EJC+miRNA	19	5	0.116	4	hsa-miR-140-3p;hsa-miR-149-5p;hsa-miR-140-3p;hsa-miR-186-5p
chr1	151341665-151341917	1354	SELENBP1	ENST00000368868	EJC+miRNA	23	6	0.115	2	hsa-miR-2355-5p;hsa-miR-493-5p
chr9	34655314-34655601	1412	IL11RA	ENST00000441545	EJC+miRNA	3	1	0.115	1	hsa-miR-128-3p
chr12	123003576-123005931	3237	RSRC2	ENST00000418773	EJC+miRNA	36	15	0.112	3	hsa-miR-654-3p;hsa-miR-361-5p;hsa-miR-409-3p
chr7	92130987-92131203	1629	PEX1	ENST00000248633	EJC+miRNA	8	2	0.111	14	hsa-let-7a-5p;hsa-let-7b-5p;hsa-let-7c-5p;hsa-let-7d-5p;hsa-let-7e-5p;hsa-let-7f-5p;hsa-miR-98-5p;hsa-miR-196a-5p;hsa-let-7g-5p;hsa-let-7i-5p;hsa-miR-379-5p;hsa-miR-505-3p;hsa-miR-421;hsa-miR-181a-2-3p
chr1	45270173-45270321	580	PLK3	ENST00000543983	EJC+miRNA	12	3	0.111	13	hsa-let-7a-5p;hsa-let-7b-5p;hsa-let-7c-5p;hsa-let-7d-5p;hsa-let-7e-5p;hsa-let-7f-5p;hsa-miR-98-5p;hsa-miR-181a-2-3p;hsa-miR-224-5p;hsa-let-7g-5p;hsa-let-7i-5p;hsa-miR-15b-3p;hsa-miR-423-5p
chr14	24031802-24032588	1713	AP1G2	ENST00000397120	EJC+miRNA	16	4	0.11	5	hsa-miR-2355-5p;hsa-miR-15a-5p;hsa-miR-16-5p;hsa-miR-221-5p;hsa-miR-15b-5p
chrX	48673458-48673790	2827	HDAC6	ENST00000444343	EJC+miRNA	12	3	0.11	7	hsa-miR-143-3p;hsa-miR-454-3p;hsa-miR-29a-3p;hsa-miR-769-5p;hsa-miR-186-5p;hsa-miR-320a;hsa-miR-320b
chr1	153609129-153610770	2319	CHTOP	ENST00000368694	EJC+miRNA	159	41	0.108	6	hsa-miR-31-5p;hsa-miR-361-3p;hsa-miR-24-3p;hsa-miR-21-5p;hsa-miR-103a-3p;hsa-miR-107
chr7	92122443-92123606	1908	PEX1	ENST00000248633	EJC+miRNA	17	4	0.105	14	hsa-let-7a-5p;hsa-let-7b-5p;hsa-let-7c-5p;hsa-let-7d-5p;hsa-let-7e-5p;hsa-let-7f-5p;hsa-miR-98-5p;hsa-miR-196a-5p;hsa-let-7g-5p;hsa-let-7i-5p;hsa-miR-379-5p;hsa-miR-505-3p;hsa-miR-421;hsa-miR-181a-2-3p
chr22	21355076-21355544	1029	THAP7	ENST00000399133	EJC+miRNA	85	20	0.105	4	hsa-miR-31-5p;hsa-miR-370-3p;hsa-miR-103a-3p;hsa-miR-107
chrX	48934409-48935495	1767	WDR45	ENST00000485908	EJC+miRNA	19	5	0.105	8	hsa-miR-27a-3p;hsa-miR-183-5p;hsa-miR-27b-3p;hsa-miR-128-3p;hsa-miR-342-3p;hsa-miR-125b-5p;hsa-miR-125a-5p;hsa-miR-574-5p
chr8	21959362-21959685	368	FAM160B2	ENST00000450006	EJC+miRNA	13	3	0.103	4	hsa-miR-15a-5p;hsa-miR-16-5p;hsa-miR-28-5p;hsa-miR-15b-5p
chr21	47666318-47666541	1537	MCM3AP	ENST00000291688	EJC+miRNA	66	15	0.102	11	hsa-miR-103a-3p;hsa-miR-107;hsa-miR-15a-5p;hsa-miR-16-5p;hsa-miR-148a-3p;hsa-miR-15b-5p;hsa-miR-145-5p;hsa-miR-152-3p;hsa-miR-148b-3p;hsa-miR-454-3p;hsa-miR-582-5p
chr7	142962185-142962353	421	GSTK1	ENST00000358406	EJC+miRNA	54	24	0.102	9	hsa-let-7a-5p;hsa-let-7b-5p;hsa-let-7c-5p;hsa-let-7d-5p;hsa-let-7e-5p;hsa-let-7f-5p;hsa-miR-98-5p;hsa-let-7g-5p;hsa-let-7i-5p
chr14	73566458-73569899	5023	RBM25	ENST00000261973	EJC+miRNA	80	19	0.101	11	hsa-miR-148a-3p;hsa-miR-152-3p;hsa-miR-148b-3p;hsa-miR-582-5p;hsa-miR-27a-3p;hsa-miR-196a-5p;hsa-miR-27b-3p;hsa-miR-181a-2-3p;hsa-miR-494-3p;hsa-miR-193b-3p;hsa-miR-192-5p
chr11	71718481-71719733	2299	NUMA1	ENST00000393695	EJC+miRNA	97	21	0.098	10	hsa-miR-22-3p;hsa-miR-24-3p;hsa-miR-31-5p;hsa-miR-221-5p;hsa-miR-484;hsa-miR-138-5p;hsa-miR-494-3p;hsa-miR-181a-2-3p;hsa-miR-146b-5p;hsa-miR-589-5p
chr3	39142368-39142506	557	GORASP1	ENST00000453680	EJC+miRNA	18	4	0.097	1	hsa-miR-185-5p
chr2	178988378-178988554	614	RBM45	ENST00000286070	EJC+miRNA	18	4	0.096	7	hsa-miR-27a-3p;hsa-miR-28-5p;hsa-miR-30a-3p;hsa-miR-27b-5p;hsa-miR-27b-3p;hsa-miR-30e-3p;hsa-miR-27b-5p
chr6	32944713-32945218	1660	BRD2	ENST00000449085	EJC+miRNA	253	53	0.095	9	hsa-miR-28-5p;hsa-miR-2355-5p;hsa-miR-15a-5p;hsa-miR-16-5p;hsa-miR-103a-3p;hsa-miR-107;hsa-miR-15b-5p;hsa-miR-146b-5p;hsa-miR-589-5p
chr3	42660619-42661155	4680	NKTR	ENST00000232978	EJC+miRNA	9	3	0.093	7	hsa-miR-30a-5p;hsa-miR-30c-5p;hsa-miR-30d-5p;hsa-miR-30b-5p;hsa-miR-30e-5p;hsa-miR-335-3p;hsa-miR-582-3p
chr2	190618790-190618866	496	OSGEPL1	ENST00000264151	EJC+miRNA	18	3	0.093	9	hsa-let-7a-5p;hsa-let-7b-5p;hsa-let-7c-5p;hsa-let-7d-5p;hsa-let-7e-5p;hsa-let-7f-5p;hsa-miR-98-5p;hsa-let-7g-5p;hsa-let-7i-5p
chr14	21463060-21463323	815	METTL17	ENST00000382985	EJC+miRNA	87	21	0.092	7	hsa-miR-484;hsa-miR-501-3p;hsa-miR-92a-1-5p;hsa-miR-221-3p;hsa-miR-222-3p;hsa-miR-505-3p;hsa-miR-582-3p
chr1	12089338-12089821	905	MIIP	ENST00000235332	EJC+miRNA	38	10	0.091	2	hsa-miR-130b-5p;hsa-miR-744-5p
chr19	12766693-12767384	1867	MAN2B1	ENST00000456935	EJC+miRNA	15	3	0.091	6	hsa-miR-103a-3p;hsa-miR-107;hsa-miR-500a-3p;hsa-miR-500a-3p;hsa-miR-28-5p;hsa-miR-138-5p
chr10	58119902-58120053	698	ZWINT	ENST00000361148	EJC+miRNA	353	70	0.09	5	hsa-miR-148a-3p;hsa-miR-152-3p;hsa-miR-148b-3p;hsa-miR-339-5p;hsa-miR-7-5p
chr3	48679442-48679790	1534	CELSR3	ENST00000164024	EJC+miRNA	26	5	0.088	6	hsa-miR-149-5p;hsa-miR-149-5p;hsa-miR-25-3p;hsa-miR-92a-3p;hsa-miR-185-5p;hsa-miR-92b-3p
chr3	49070206-49070552	742	QRICH1	ENST00000357496	EJC+miRNA	93	18	0.088	26	hsa-miR-181a-2-3p;hsa-miR-138-5p;hsa-miR-26a-5p;hsa-miR-26b-5p;hsa-miR-362-5p;hsa-let-7a-5p;hsa-let-7b-5p;hsa-let-7c-5p;hsa-let-7d-5p;hsa-let-7e-5p;hsa-let-7f-5p;hsa-miR-98-5p;hsa-miR-196a-5p;hsa-let-7g-5p;hsa-let-7i-5p;hsa-miR-27b-5p;hsa-miR-379-5p;hsa-miR-24-3p;hsa-miR-181a-2-3p;hsa-miR-149-5p;hsa-miR-193b-3p;hsa-miR-181a-2-3p;hsa-miR-148a-3p;hsa-miR-152-3p;hsa-miR-148b-3p;hsa-miR-454-3p
chr3	9516266-9516751	1100	SETD5	ENST00000407969	EJC+miRNA	70	13	0.084	10	hsa-miR-340-3p;hsa-miR-183-5p;hsa-miR-345-5p;hsa-miR-148a-3p;hsa-miR-7-5p;hsa-miR-152-3p;hsa-miR-148b-3p;hsa-miR-423-5p;hsa-miR-629-5p;hsa-miR-454-3p
chr11	64559558-64559643	448	MAP4K2	ENST00000294066	EJC+miRNA	12	2	0.083	3	hsa-miR-7-5p;hsa-miR-362-5p;hsa-miR-654-3p
chr5	180660435-180660635	902	TRIM41	ENST00000315073	EJC+miRNA	7	4	0.083	1	hsa-miR-361-3p
chr5	10400954-10402170	2902	MARCH6	ENST00000449913	EJC+miRNA	195	54	0.083	48	hsa-miR-143-3p;hsa-miR-21-3p;hsa-miR-21-3p;hsa-miR-22-3p;hsa-miR-425-5p;hsa-miR-329-3p;hsa-miR-409-3p;hsa-miR-181a-2-3p;hsa-miR-335-3p;hsa-miR-409-3p;hsa-miR-582-5p;hsa-miR-29a-3p;hsa-miR-15a-5p;hsa-miR-16-5p;hsa-miR-15b-5p;hsa-miR-140-3p;hsa-miR-769-5p;hsa-miR-96-5p;hsa-miR-34a-5p;hsa-miR-182-5p;hsa-miR-455-3p;hsa-miR-1271-5p;hsa-let-7a-3p;hsa-miR-409-3p;hsa-miR-140-3p;hsa-miR-181a-2-3p;hsa-miR-…
chr11	128843327-128844018	3826	ARHGAP32	ENST00000527272	EJC+miRNA	11	2	0.083	2	hsa-miR-378a-3p;hsa-miR-574-5p
chr2	201721708-201722440	774	CLK1	ENST00000409403	EJC+miRNA	63	11	0.08	1	hsa-let-7d-3p
chr9	140508221-140508483	818	ARRDC1	ENST00000371421	EJC+miRNA	64	11	0.079	6	hsa-miR-27a-3p;hsa-miR-27a-3p;hsa-miR-27b-3p;hsa-miR-27b-3p;hsa-miR-128-3p;hsa-miR-1180-3p
chr3	50327059-50327142	771	IFRD2	ENST00000429673	EJC+miRNA	92	20	0.079	2	hsa-miR-140-3p;hsa-miR-484
chr14	24032847-24032924	1200	AP1G2	ENST00000397120	EJC+miRNA	11	2	0.078	5	hsa-miR-2355-5p;hsa-miR-15a-5p;hsa-miR-16-5p;hsa-miR-221-5p;hsa-miR-15b-5p
chr12	56743974-56744195	1650	STAT2	ENST00000557235	EJC+miRNA	5	3	0.078	9	hsa-miR-10a-5p;hsa-miR-10b-5p;hsa-miR-125b-5p;hsa-miR-125a-5p;hsa-miR-345-5p;hsa-miR-24-3p;hsa-miR-27a-3p;hsa-miR-27b-3p;hsa-miR-654-3p
chr8	100883115-100883675	1055	VPS13B	ENST00000357162	EJC+miRNA	12	2	0.077	1	hsa-miR-423-5p
chr22	39136437-39137011	1441	SUN2	ENST00000216064	EJC+miRNA	33	9	0.076	4	hsa-miR-148a-3p;hsa-miR-152-3p;hsa-miR-148b-3p;hsa-miR-615-3p
chrX	48370323-48370713	1362	PORCN	ENST00000361988	EJC+miRNA	11	3	0.076	14	hsa-miR-25-5p;hsa-miR-185-5p;hsa-miR-2355-5p;hsa-let-7a-5p;hsa-let-7b-5p;hsa-let-7c-5p;hsa-let-7d-5p;hsa-let-7e-5p;hsa-let-7f-5p;hsa-miR-98-5p;hsa-miR-196a-5p;hsa-miR-7-5p;hsa-let-7g-5p;hsa-let-7i-5p
chr6	43471444-43472498	1852	TJAP1	ENST00000372444	miRNA	23	4	0.076	2	hsa-miR-744-5p;hsa-miR-345-5p
chr1	114940482-114940561	208	TRIM33	ENST00000450349	EJC+miRNA	21	4	0.075	3	hsa-miR-340-5p;hsa-miR-345-5p;hsa-miR-744-5p
chr11	64564852-64564972	1410	MAP4K2	ENST00000294066	EJC+miRNA	3	1	0.074	8	hsa-miR-15a-5p;hsa-miR-16-5p;hsa-miR-103a-3p;hsa-miR-107;hsa-miR-15b-5p;hsa-miR-7-5p;hsa-miR-362-5p;hsa-miR-654-3p
chr12	64818962-64819117	1523	XPOT	ENST00000332707	EJC+miRNA	256	40	0.072	19	hsa-miR-18a-5p;hsa-miR-340-5p;hsa-miR-494-3p;hsa-miR-495-3p;hsa-miR-744-5p;hsa-miR-7-5p;hsa-miR-191-5p;hsa-miR-30a-5p;hsa-miR-30c-5p;hsa-miR-30d-5p;hsa-miR-30b-5p;hsa-miR-30e-5p;hsa-miR-654-3p;hsa-miR-27a-3p;hsa-miR-27b-3p;hsa-miR-128-3p;hsa-miR-320a;hsa-miR-320b;hsa-miR-365b-3p
chr2	234198620-234198893	684	ATG16L1	ENST00000392020	EJC+miRNA	39	6	0.071	2	hsa-miR-145-5p;hsa-miR-106b-3p
chr1	45269363-45269602	1012	PLK3	ENST00000543983	EJC+miRNA	13	2	0.071	13	hsa-let-7a-5p;hsa-let-7b-5p;hsa-let-7c-5p;hsa-let-7d-5p;hsa-let-7e-5p;hsa-let-7f-5p;hsa-miR-98-5p;hsa-miR-181a-2-3p;hsa-miR-224-5p;hsa-let-7g-5p;hsa-let-7i-5p;hsa-miR-15b-3p;hsa-miR-423-5p
chr9	139837147-139837220	1132	FBXW5	ENST00000325285	EJC+miRNA	213	25	0.07	2	hsa-miR-29a-3p;hsa-miR-615-3p
chr10	58119614-58119778	395	ZWINT	ENST00000361148	EJC+miRNA	312	47	0.07	1	hsa-miR-7-5p
chr10	75554088-75554298	2889	KIAA0913	ENST00000398706	EJC+miRNA	20	3	0.07	4	hsa-miR-24-3p;hsa-miR-29a-3p;hsa-miR-361-3p;hsa-miR-582-3p
chr14	68228301-68228919	1743	ZFYVE26	ENST00000411699	EJC+miRNA	20	3	0.07	22	hsa-miR-196a-5p;hsa-miR-379-5p;hsa-let-7a-5p;hsa-let-7b-5p;hsa-let-7c-5p;hsa-let-7d-5p;hsa-let-7e-5p;hsa-let-7f-5p;hsa-miR-98-5p;hsa-miR-196a-5p;hsa-let-7g-5p;hsa-let-7i-5p;hsa-miR-27b-5p;hsa-miR-379-5p;hsa-miR-17-5p;hsa-miR-20a-5p;hsa-miR-92a-1-5p;hsa-miR-93-5p;hsa-miR-96-5p;hsa-miR-182-5p;hsa-miR-106b-5p;hsa-miR-1271-5p
chr12	123465846-123466141	822	ARL6IP4	ENST00000439686	EJC+miRNA	113	17	0.07	3	hsa-miR-28-5p;hsa-miR-7-5p;hsa-miR-582-3p
chr7	100210619-100210816	545	MOSPD3	ENST00000393950	EJC+miRNA	19	3	0.066	5	hsa-miR-125b-5p;hsa-miR-125a-5p;hsa-miR-23a-3p;hsa-miR-27a-5p;hsa-miR-23b-3p
chr12	121756227-121756303	403	ANAPC5	ENST00000261819	EJC+miRNA	196	22	0.065	7	hsa-miR-30a-5p;hsa-miR-30c-5p;hsa-miR-30d-5p;hsa-miR-30b-5p;hsa-miR-125b-5p;hsa-miR-125a-5p;hsa-miR-30e-5p
chr3	50098980-50099394	1296	RBM6	ENST00000266022	EJC+miRNA	63	9	0.064	2	hsa-miR-335-5p;hsa-miR-452-5p
chrX	48673147-48673240	2699	HDAC6	ENST00000444343	EJC+miRNA	7	2	0.064	4	hsa-miR-143-3p;hsa-miR-454-3p;hsa-miR-29a-3p;hsa-miR-769-5p
chr16	70542367-70543133	2110	COG4	ENST00000323786	EJC+miRNA	34	6	0.063	3	hsa-miR-452-5p;hsa-miR-92a-1-5p;hsa-miR-452-5p
chr8	145736105-145736176	299	MFSD3	ENST00000301327	EJC+miRNA	50	5	0.062	13	hsa-miR-18a-5p;hsa-miR-15a-5p;hsa-miR-15a-5p;hsa-miR-15a-5p;hsa-miR-16-5p;hsa-miR-16-5p;hsa-miR-16-5p;hsa-miR-103a-3p;hsa-miR-107;hsa-miR-15b-5p;hsa-miR-15b-5p;hsa-miR-15b-5p;hsa-miR-2355-5p
chr20	35399596-35399827	1185	DSN1	ENST00000373750	EJC+miRNA	30	6	0.062	6	hsa-miR-145-3p;hsa-miR-494-3p;hsa-miR-193b-3p;hsa-miR-582-3p;hsa-miR-186-5p;hsa-miR-582-5p
chr3	52436887-52437153	538	BAP1	ENST00000296288	EJC+miRNA	139	18	0.061	1	hsa-miR-18a-5p
chr5	179044933-179044989	611	HNRNPH1	ENST00000393432	EJC+miRNA	845	66	0.061	6	hsa-miR-128-3p;hsa-miR-493-5p;hsa-miR-27a-3p;hsa-miR-27b-3p;hsa-miR-342-3p;hsa-miR-197-3p
chr10	135215094-135215652	759	MTG1.1	ENST00000317502	EJC+miRNA	37	6	0.06	4	hsa-miR-15a-5p;hsa-miR-16-5p;hsa-miR-25-5p;hsa-miR-15b-5p
chr8	145140382-145140475	504	GPAA1	ENST00000355091	EJC+miRNA	164	21	0.06	15	hsa-miR-29a-3p;hsa-miR-103a-3p;hsa-miR-107;hsa-miR-138-5p;hsa-miR-31-5p;hsa-miR-96-5p;hsa-miR-103a-3p;hsa-miR-107;hsa-miR-182-5p;hsa-miR-1271-5p;hsa-miR-379-5p;hsa-miR-10a-5p;hsa-miR-10b-5p;hsa-miR-339-5p;hsa-miR-339-5p
chr8	144696623-144696793	259	TSTA3	ENST00000425753	EJC+miRNA	178	26	0.06	2	hsa-miR-149-5p;hsa-miR-193b-3p
chr2	27456404-27456493	3512	CAD	ENST00000264705	EJC+miRNA	58	7	0.059	9	hsa-miR-362-5p;hsa-miR-378a-3p;hsa-miR-15a-5p;hsa-miR-16-5p;hsa-miR-15b-5p;hsa-miR-320a;hsa-miR-320b;hsa-miR-941;hsa-miR-224-5p
chr8	145138403-145138616	1574	GPAA1	ENST00000355091	EJC+miRNA	103	13	0.059	17	hsa-miR-29a-3p;hsa-miR-103a-3p;hsa-miR-107;hsa-miR-138-5p;hsa-miR-31-5p;hsa-miR-96-5p;hsa-miR-103a-3p;hsa-miR-107;hsa-miR-182-5p;hsa-miR-1271-5p;hsa-miR-379-5p;hsa-miR-10a-5p;hsa-miR-10b-5p;hsa-miR-339-5p;hsa-miR-339-5p;hsa-miR-29a-3p;hsa-miR-140-3p
chr12	121017400-121017576	329	POP5	ENST00000357500	EJC+miRNA	128	17	0.059	2	hsa-miR-27a-3p;hsa-miR-27b-3p
chr1	24123076-24123186	185	GALE	ENST00000418277	miRNA	62	9	0.059	2	hsa-miR-103a-3p;hsa-miR-107
chr1	45268825-45268939	953	PLK3	ENST00000543983	EJC+miRNA	16	2	0.059	13	hsa-let-7a-5p;hsa-let-7b-5p;hsa-let-7c-5p;hsa-let-7d-5p;hsa-let-7e-5p;hsa-let-7f-5p;hsa-miR-98-5p;hsa-miR-181a-2-3p;hsa-miR-224-5p;hsa-let-7g-5p;hsa-let-7i-5p;hsa-miR-15b-3p;hsa-miR-423-5p
chr14	75572699-75573204	1813	NEK9	ENST00000238616	EJC+miRNA	31	6	0.058	12	hsa-let-7a-5p;hsa-let-7b-5p;hsa-let-7c-5p;hsa-let-7d-5p;hsa-let-7e-5p;hsa-let-7f-5p;hsa-miR-98-5p;hsa-let-7g-5p;hsa-let-7i-5p;hsa-miR-361-5p;hsa-miR-143-3p;hsa-miR-22-3p
chr15	85191185-85191767	1414	WDR73	ENST00000434634	EJC+miRNA	51	8	0.058	2	hsa-miR-197-3p;hsa-miR-181a-2-3p
chr11	62566047-62567848	2587	NXF1	ENST00000294172	EJC+miRNA	54	12	0.055	8	hsa-miR-31-5p;hsa-miR-335-5p;hsa-miR-423-5p;hsa-miR-582-3p;hsa-miR-24-3p;hsa-miR-143-3p;hsa-miR-193b-3p;hsa-miR-582-3p
chr12	113726039-113726562	1145	TPCN1	ENST00000541517	EJC+miRNA	22	3	0.055	4	hsa-miR-744-5p;hsa-miR-181a-2-3p;hsa-miR-365b-3p;hsa-miR-495-3p
chr1	155785691-155786002	5906	GON4L	ENST00000437809	EJC+miRNA	12	2	0.054	4	hsa-miR-27a-5p;hsa-miR-148a-3p;hsa-miR-152-3p;hsa-miR-148b-3p
chr22	20939302-20939387	367	MED15	ENST00000292733	EJC+miRNA	88	9	0.053	2	hsa-miR-27a-5p;hsa-miR-181a-2-3p
chr6	134492053-134492160	318	SGK1	ENST00000237305	EJC+miRNA	223	25	0.052	4	hsa-miR-149-5p;hsa-miR-151a-5p;hsa-miR-484;hsa-miR-151b
chr14	21458236-21458388	1346	METTL17	ENST00000382985	EJC+miRNA	46	5	0.052	10	hsa-miR-484;hsa-miR-501-3p;hsa-miR-92a-1-5p;hsa-miR-221-3p;hsa-miR-222-3p;hsa-miR-505-3p;hsa-miR-582-3p;hsa-miR-196a-5p;hsa-miR-379-5p;hsa-miR-145-5p
chr20	31016051-31016127	4096	ASXL1	ENST00000412498	EJC+miRNA	79	7	0.052	54	hsa-miR-197-3p;hsa-miR-27b-5p;hsa-miR-140-3p;hsa-miR-582-5p;hsa-miR-30a-3p;hsa-miR-96-5p;hsa-miR-182-5p;hsa-miR-30e-3p;hsa-miR-484;hsa-miR-1271-5p;hsa-miR-143-3p;hsa-miR-18a-5p;hsa-miR-185-5p;hsa-miR-31-5p;hsa-miR-425-5p;hsa-miR-361-3p;hsa-miR-495-3p;hsa-miR-181a-5p;hsa-miR-181b-5p;hsa-miR-320a;hsa-miR-320b;hsa-miR-23a-3p;hsa-miR-23b-3p;hsa-miR-378a-3p;hsa-let-7a-5p;hsa-let-7b-5p;hsa-let-7c-5p;hs…
chr3	146239492-146239619	472	PLSCR1	ENST00000448787	EJC+miRNA	46	5	0.052	7	hsa-miR-30a-5p;hsa-miR-30c-5p;hsa-miR-30d-5p;hsa-miR-30b-5p;hsa-miR-30e-5p;hsa-miR-379-5p;hsa-miR-22-3p
chr15	50867986-50868065	982	TRPM7	ENST00000313478	EJC+miRNA	13	3	0.051	4	hsa-miR-125b-5p;hsa-miR-125a-5p;hsa-miR-340-5p;hsa-miR-24-3p
chr7	142961769-142962084	693	GSTK1	ENST00000358406	EJC+miRNA	179	19	0.05	10	hsa-let-7a-5p;hsa-let-7b-5p;hsa-let-7c-5p;hsa-let-7d-5p;hsa-let-7e-5p;hsa-let-7f-5p;hsa-miR-98-5p;hsa-let-7g-5p;hsa-let-7i-5p;hsa-miR-192-5p
chr1	213415640-213415911	598	RPS6KC1	ENST00000366960	EJC+miRNA	29	3	0.049	4	hsa-miR-370-3p;hsa-miR-27a-3p;hsa-miR-27b-3p;hsa-miR-484
chr6	44197783-44198083	1140	SLC29A1	ENST00000371755	EJC+miRNA	156	16	0.049	17	hsa-miR-148a-3p;hsa-miR-152-3p;hsa-miR-361-3p;hsa-miR-148b-3p;hsa-miR-196a-5p;hsa-miR-128-3p;hsa-miR-140-3p;hsa-miR-744-5p;hsa-miR-21-3p;hsa-miR-29a-3p;hsa-miR-192-5p;hsa-miR-378a-3p;hsa-miR-22-3p;hsa-miR-138-5p;hsa-miR-370-3p;hsa-miR-744-5p;hsa-miR-221-5p
chr14	21458542-21458622	1234	METTL17	ENST00000382985	EJC+miRNA	68	6	0.049	10	hsa-miR-484;hsa-miR-501-3p;hsa-miR-92a-1-5p;hsa-miR-221-3p;hsa-miR-222-3p;hsa-miR-505-3p;hsa-miR-582-3p;hsa-miR-196a-5p;hsa-miR-379-5p;hsa-miR-145-5p
chr17	7579721-7579838	1131	TP53	ENST00000269305	EJC+miRNA	6	2	0.048	19	hsa-miR-27b-5p;hsa-miR-378a-3p;hsa-miR-22-3p;hsa-miR-17-5p;hsa-miR-20a-5p;hsa-miR-93-5p;hsa-miR-106b-5p;hsa-let-7a-5p;hsa-let-7b-5p;hsa-let-7c-5p;hsa-let-7d-5p;hsa-let-7e-5p;hsa-let-7f-5p;hsa-miR-98-5p;hsa-miR-196a-5p;hsa-let-7g-5p;hsa-let-7i-5p;hsa-miR-379-5p;hsa-miR-151a-3p
chr12	49959998-49960504	1877	MCRS1	ENST00000343810	EJC+miRNA	172	17	0.047	6	hsa-miR-181a-2-3p;hsa-miR-193b-3p;hsa-miR-484;hsa-miR-22-3p;hsa-miR-103a-3p;hsa-miR-107
chr5	179048036-179048242	1298	HNRNPH1	ENST00000393432	EJC+miRNA	943	92	0.047	6	hsa-miR-128-3p;hsa-miR-493-5p;hsa-miR-27a-3p;hsa-miR-27b-3p;hsa-miR-342-3p;hsa-miR-197-3p
chr11	93527030-93527116	1241	MED17	ENST00000427225	EJC+miRNA	74	7	0.047	8	hsa-miR-15a-5p;hsa-miR-16-5p;hsa-miR-15b-5p;hsa-miR-340-5p;hsa-miR-495-3p;hsa-miR-454-3p;hsa-miR-370-3p;hsa-miR-493-5p
chr6	35436804-35437157	748	RPL10A	ENST00000322203	EJC+miRNA	2014	210	0.046	6	hsa-miR-361-3p;hsa-miR-329-3p;hsa-miR-329-3p;hsa-miR-146b-5p;hsa-miR-589-5p;hsa-miR-744-5p
chr6	97717868-97720579	5711	MMS22L	ENST00000369251	EJC+miRNA	31	3	0.046	41	hsa-miR-29a-3p;hsa-miR-185-5p;hsa-miR-409-3p;hsa-miR-155-5p;hsa-miR-221-3p;hsa-miR-222-3p;hsa-miR-186-5p;hsa-miR-381-3p;hsa-miR-22-3p;hsa-miR-21-3p;hsa-miR-21-3p;hsa-miR-186-5p;hsa-miR-138-5p;hsa-miR-381-3p;hsa-miR-96-5p;hsa-miR-182-5p;hsa-miR-149-5p;hsa-miR-1271-5p;hsa-miR-17-5p;hsa-miR-20a-5p;hsa-miR-23a-3p;hsa-miR-93-5p;hsa-miR-23b-3p;hsa-miR-106b-5p;hsa-miR-143-3p;hsa-miR-186-5p;hsa-miR-197-3…
chr12	121783834-121784698	2731	ANAPC5	ENST00000261819	EJC+miRNA	254	24	0.045	24	hsa-miR-34a-5p;hsa-miR-493-5p;hsa-miR-582-5p;hsa-miR-27a-3p;hsa-miR-27b-3p;hsa-miR-25-5p;hsa-miR-345-5p;hsa-miR-15b-3p;hsa-miR-145-3p;hsa-miR-21-5p;hsa-miR-27b-5p;hsa-miR-320a;hsa-miR-381-3p;hsa-miR-320b;hsa-miR-30a-3p;hsa-miR-30e-3p;hsa-miR-452-5p;hsa-miR-30a-5p;hsa-miR-30c-5p;hsa-miR-30d-5p;hsa-miR-30b-5p;hsa-miR-125b-5p;hsa-miR-125a-5p;hsa-miR-30e-5p
chr12	48528821-48529073	1626	PFKM	ENST00000359794	EJC+miRNA	168	16	0.045	12	hsa-miR-181a-5p;hsa-miR-181b-5p;hsa-miR-370-3p;hsa-miR-27a-3p;hsa-miR-27b-3p;hsa-miR-128-3p;hsa-miR-342-3p;hsa-miR-27a-3p;hsa-miR-181a-2-3p;hsa-miR-27b-3p;hsa-miR-361-3p;hsa-miR-484
chr9	134404425-134404514	353	UCK1	ENST00000372215	EJC+miRNA	100	9	0.045	3	hsa-miR-24-3p;hsa-miR-221-5p;hsa-miR-149-5p
