# Supplementary figures and images for: MicroRNA-mediated repression of nonsense mRNAs
Source: eLife journal article supplement (doi:10.7554/elife.03032), 2014-08-08

A

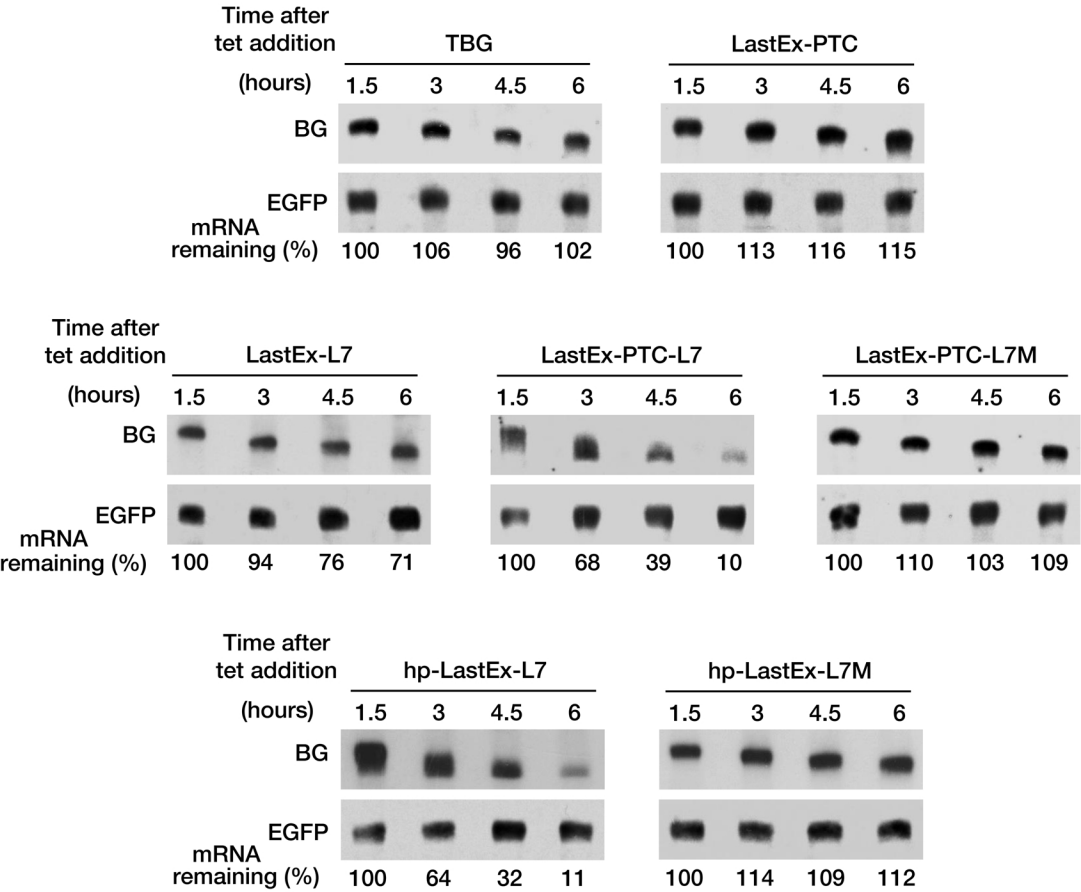

B

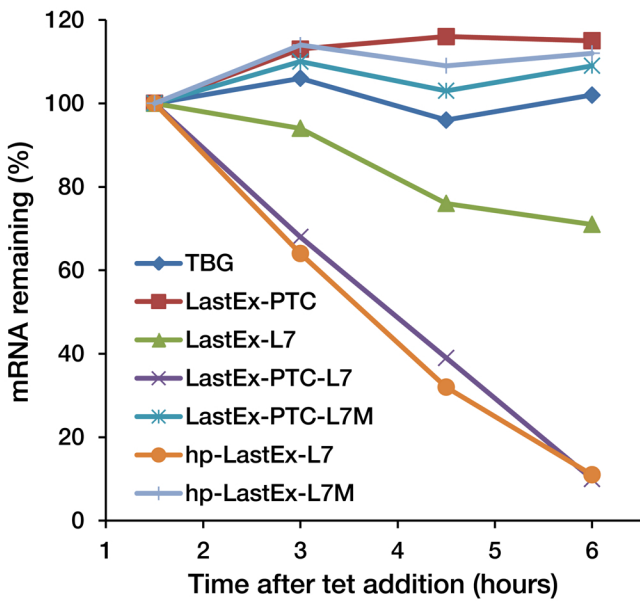

Figure 1-figure supplement 1. A PTC potentiates rapid miRNA-mediated decay of nonsense mRNAs

Supplement: supp [file elife-03032-supp-v1.zip]

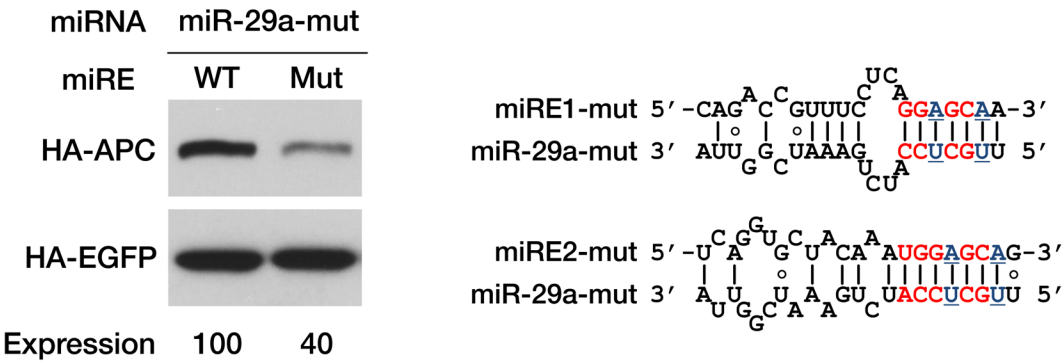

Figure 3-figure supplement 5. Confirmation of interaction between miR-29a and its miREs in APC mRNA

Supplement: supp [file elife-03032-supp-v1.zip]

A

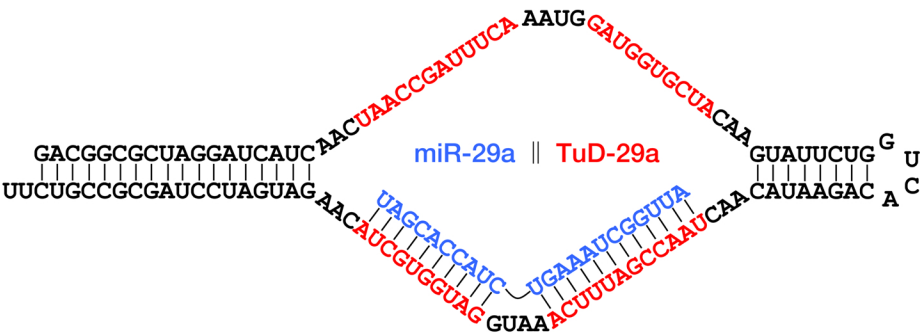

B

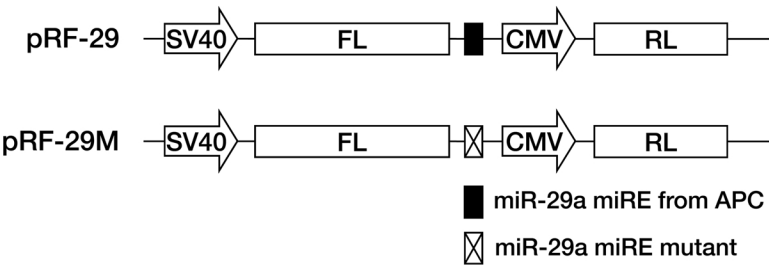

C

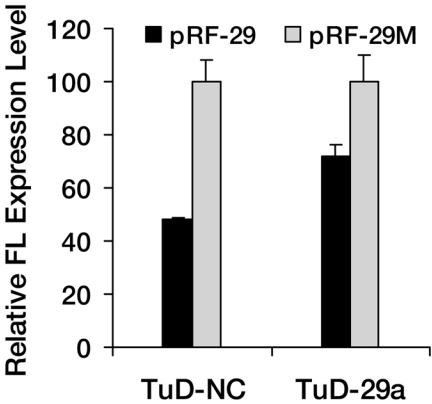

D

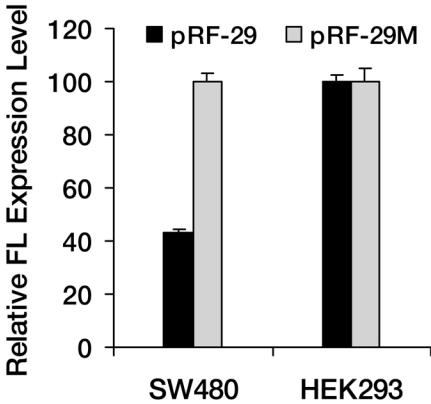

Figure 3-figure supplement 4. Successful knockdown of endogenous miR-29a by TuD-29a

Supplement: supp [file elife-03032-supp-v1.zip]

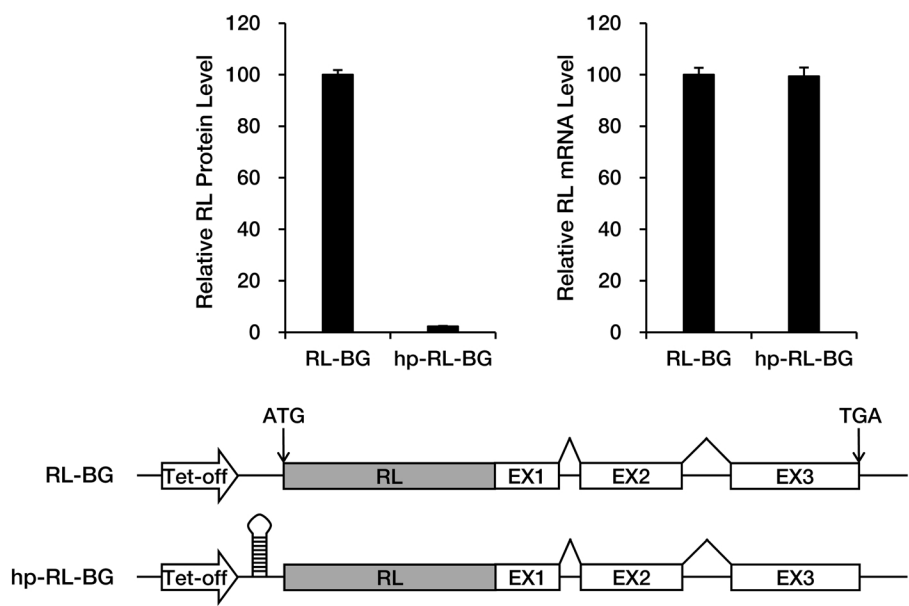

Figure 1-figure supplement 3. A large stem-loop structure in the 5' UTR blocks translation of BG mRNA

Supplement: supp [file elife-03032-supp-v1.zip]
